# Supplementary material for: Development and implementation of a new biomassburning emissions injection height scheme for the GEOSChemmodel
Source: Copernicus journal article supplement (doi:10.5194/gmd-2018-93), 2018-06-15
Supplement: Supplementary file [file gmd-2018-93-AC1-supplement.zip]

Supplemental Material For: A Global Climatology of Wildfire Smoke Injection Height Derived from  
Space-based Multi-angle Imaging

Maria Val Martin<sup>1</sup> and Ralph A. Kahn<sup>2</sup>

<sup>1</sup>Leverhulme Center for Climate Change Mitigation, Animal and Plant Science Department, University  
5 of Sheffield, Sheffield, UK

<sup>2</sup>Climate and Radiation Laboratory, Earth Science Division, NASA Goddard Space Flight Center,  
Greenbelt, MD 20771, USA

**Table S1.** Summary of equations used to calculate the fitting technique parameters<sup>a</sup>.

| Normal Distribution                                          | Log-Normal Distribution                                                                                  |
|--------------------------------------------------------------|----------------------------------------------------------------------------------------------------------|
| $\mu_z = \frac{\sum_{i=1}^N z_i}{N}$                         | $\mu_{lnz} = \frac{\sum_{i=1}^N \ln(z_i)}{N}$                                                            |
| $\sigma_z = \sqrt{\frac{\sum_{i=1}^N (z_i - \mu_z)^2}{N-1}}$ | $\sigma_{lnz} = \sqrt{\frac{\sum_{i=1}^N [\ln(z_i) - \mu_{lnz}]^2}{N-1}}$                                |
| $\sigma'_z = \sqrt{\sigma_z^2 + 500^2}$                      | $\mu_z = e^{\mu_{lnz} + \frac{\sigma_{lnz}^2}{2}}$                                                       |
| $\mu'_z = \mu_z$                                             | $\sigma_z = e^{\mu_{lnz} + \frac{\sigma_{lnz}^2}{2}} \sqrt{e^{\sigma_{lnz}^2} - 1}$                      |
|                                                              | $c = \sqrt{\frac{\sigma_z^2 + 500^2}{\sigma_z^2}}$                                                       |
|                                                              | $f = \ln \left[ \frac{1 + \frac{\sigma_z^2}{\mu_z^2}}{1 + c^2 \cdot \frac{\sigma_z^2}{\mu_z^2}} \right]$ |
|                                                              | $\mu'_{lnz} = \mu_{lnz} + \frac{f}{2}$                                                                   |
|                                                              | $\sigma'_{lnz} = \sqrt{\sigma_{lnz}^2 + f}$                                                              |

<sup>a</sup>  $\mu_z$  and  $\sigma_z$  are the mean and standard deviation (SD) of the MISR plume height retrieved points,  $\mu_{lnz}$  and  $\sigma_{lnz}$  are the mean and SD of the natural logarithm of the MISR plume height retrieved points; the prime superscript (') denotes adjustment of the mean and SD to account for the  $\pm 500$  m MISR measurement uncertainty. Note that, in the case of lognormal distribution, this adjustment modifies the mean as well as the SD.

**Table S2.** Percentages (minimum and maximum) applied to the vertical distribution lowest level to account for small fires under detected by MISR.

|                | Forest | Savanna | Grassland | Cropland |
|----------------|--------|---------|-----------|----------|
| North America  | 13–30  | 15–36   | 10–30     | 31–44    |
| South America  | 29–43  | 22–33   | 20–34     | 24–38    |
| Africa         | 35–50  | 16–44   | 11–25     | 22–31    |
| Europa         | 36–50  | 28–47   | 27–49     | 31–48    |
| Boreal Eurasia | 23–50  | 8–46    | 28–39     | 36–46    |
| South Asia     | 34–45  | 12–45   | 10–30     | 38–45    |
| Australia      | 27–50  | 11–26   | 7–42      | 36–46    |

**Table S3.** Statistical summary of maximum plume heights and mean AOD per biome in the MISR climatology<sup>a</sup>

| Biome               | N    | 2008                  |                        | N    | 2009                  |                        | N    | 2010                  |                        |
|---------------------|------|-----------------------|------------------------|------|-----------------------|------------------------|------|-----------------------|------------------------|
|                     |      | Max Height<br>(m agl) | Mean AOD<br>(unitless) |      | Max Height<br>(m agl) | Mean AOD<br>(unitless) |      | Max Height<br>(m agl) | Mean AOD<br>(unitless) |
| Everg Ndl Forest    | 143  | 1750 ± 1075           | 0.32 ± 0.29            | 48   | 1559 ± 762            | 0.16 ± 0.15            | 88   | 1786 ± 843            | 0.31 ± 0.25            |
| Everg Brl Forest    | 547  | 1005 ± 475            | 0.27 ± 0.19            | 232  | 1099 ± 534            | 0.26 ± 0.20            | 478  | 1280 ± 700            | 0.52 ± 0.32            |
| Decid Ndl Forest    | 372  | 1409 ± 636            | 0.40 ± 0.29            | 46   | 1589 ± 700            | 0.18 ± 0.12            | 20   | 1454 ± 518            | 0.19 ± 0.14            |
| Decid Broadl Forest | 124  | 1216 ± 751            | 0.21 ± 0.12            | 44   | 1571 ± 1022           | 0.17 ± 0.11            | 59   | 1299 ± 805            | 0.22 ± 0.20            |
| Mixed Forest        | 578  | 1283 ± 648            | 0.30 ± 0.26            | 126  | 1295 ± 713            | 0.20 ± 0.18            | 213  | 1718 ± 1077           | 0.40 ± 0.35            |
| Closed Shrub        | 9    | 1223 ± 373            | 0.11 ± 0.11            | 8    | 1920 ± 1007           | 0.15 ± 0.13            | –    | –                     | –                      |
| Open Shrub          | 461  | 1517 ± 771            | 0.29 ± 0.28            | 262  | 1524 ± 778            | 0.26 ± 0.20            | 319  | 1444 ± 865            | 0.29 ± 0.22            |
| Woody Savanna       | 3762 | 1096 ± 519            | 0.28 ± 0.17            | 1846 | 1136 ± 580            | 0.27 ± 0.16            | 1123 | 1226 ± 648            | 0.25 ± 0.17            |
| Savanna             | 2893 | 1243 ± 593            | 0.22 ± 0.16            | 1405 | 1282 ± 652            | 0.21 ± 0.14            | 1126 | 1410 ± 711            | 0.26 ± 0.20            |
| Grassland           | 832  | 1365 ± 770            | 0.19 ± 0.17            | 236  | 1311 ± 736            | 0.18 ± 0.14            | 243  | 1529 ± 901            | 0.18 ± 0.13            |
| Wetland             | 95   | 1006 ± 513            | 0.23 ± 0.18            | 47   | 1142 ± 468            | 0.24 ± 0.13            | 42   | 1212 ± 481            | 0.29 ± 0.22            |
| Cropland            | 1761 | 1196 ± 605            | 0.28 ± 0.21            | 440  | 1118 ± 593            | 0.26 ± 0.18            | 420  | 1288 ± 862            | 0.21 ± 0.17            |

<sup>a</sup>Only included distributions with more than 5 observations. Reported the average±SD and number of observations

**Table S4a.** AOD-weighted percentages of fire smoke injection heights per fire region, main biomes and seasons, for North and South America. Note that percentages are above ground level.

|               | Forest |      |      |      | Shrubland |      |      |      | Grassland |      |      |      | Cropland |      |      |      |
|---------------|--------|------|------|------|-----------|------|------|------|-----------|------|------|------|----------|------|------|------|
|               | MAM    | JJA  | SON  | DJF  | MAM       | JJA  | SON  | DJF  | MAM       | JJA  | SON  | DJF  | MAM      | JJA  | SON  | DJF  |
| North America |        |      |      |      |           |      |      |      |           |      |      |      |          |      |      |      |
| 0–250         | 12.1   | 4.9  | 3.6  | 8.8  | 13.9      | 7.7  | 19.5 | 24.2 | 19.3      | 3.0  | 9.8  | 14.5 | 19.3     | 3.0  | 16.9 | 6.7  |
| 250–500       | 14.0   | 8.7  | 5.4  | 32.7 | 17.5      | 10.1 | 17.7 | 35.6 | 30.6      | 12.0 | 30.0 | 21.1 | 30.6     | 12.0 | 35.8 | 35.2 |
| 500–750       | 14.5   | 10.4 | 5.4  | 18.9 | 18.6      | 12.1 | 14.9 | 17.0 | 21.7      | 22.0 | 23.1 | 31.1 | 21.7     | 22.0 | 15.6 | 20.1 |
| 750–1000      | 12.0   | 10.4 | 5.3  | 8.6  | 15.2      | 13.1 | 10.4 | 7.8  | 11.6      | 21.7 | 10.8 | 11.7 | 11.6     | 21.7 | 9.2  | 13.4 |
| 1000–1250     | 8.6    | 10.5 | 5.6  | 5.0  | 11.9      | 13.0 | 9.5  | 6.0  | 7.5       | 16.4 | 8.6  | 10.9 | 7.5      | 16.4 | 11.5 | 7.2  |
| 1250–1500     | 7.8    | 8.9  | 7.5  | 4.4  | 10.4      | 8.6  | 7.2  | 3.0  | 4.1       | 9.3  | 7.0  | 6.2  | 4.1      | 9.3  | 5.7  | 6.4  |
| 1500–1750     | 5.4    | 6.7  | 8.8  | 4.1  | 5.2       | 6.9  | 5.8  | 2.0  | 2.1       | 6.1  | 4.4  | 1.7  | 2.1      | 6.1  | 2.8  | 4.2  |
| 1750–2000     | 3.4    | 5.4  | 9.2  | 4.3  | 3.3       | 6.4  | 4.6  | 1.7  | 1.2       | 3.7  | 2.4  | 1.5  | 1.2      | 3.7  | 1.3  | 1.3  |
| 2000–2050     | 2.7    | 4.4  | 7.4  | 4.3  | 1.9       | 7.9  | 2.6  | 1.1  | 0.7       | 2.3  | 2.1  | 0.1  | 0.7      | 2.3  | 0.5  | 1.1  |
| 2250–2500     | 2.2    | 3.9  | 6.1  | 1.9  | 0.9       | 8.8  | 1.9  | 0.4  | 0.5       | 1.5  | 0.8  | 0.2  | 0.5      | 1.5  | 0.4  | 1.1  |
| 2500–2750     | 1.8    | 3.0  | 4.5  | 0.6  | 0.4       | 3.4  | 2.3  | 0.8  | 0.3       | 0.8  | 0.5  | 0.3  | 0.3      | 0.8  | 0.3  | 0.8  |
| 2750–3000     | 2.2    | 2.5  | 2.5  | 2.4  | 0.3       | 0.9  | 1.6  | 0.3  | 0.1       | 0.6  | 0.3  | 0.5  | 0.1      | 0.6  | 0.0  | 0.6  |
| 3000–3250     | 2.2    | 2.4  | 2.5  | 0.6  | 0.2       | 0.5  | 0.8  | 0.1  | 0.1       | 0.3  | 0.1  | 0.2  | 0.1      | 0.3  | 0.0  | 0.8  |
| 3250–3500     | 2.1    | 2.2  | 2.3  | 0.9  | 0.1       | 0.3  | 0.3  | 0.0  | 0.1       | 0.2  | 0.1  | 0.0  | 0.1      | 0.2  | 0.0  | 0.1  |
| 3500–3749     | 2.0    | 2.2  | 2.3  | 2.5  | 0.1       | 0.1  | 0.2  | 0.0  | 0.1       | 0.1  | 0.0  | 0.0  | 0.1      | 0.1  | 0.0  | 0.2  |
| 3750–4000     | 1.8    | 2.2  | 3.0  | 0.0  | 0.1       | 0.1  | 0.2  | 0.0  | 0.0       | 0.0  | 0.0  | 0.0  | 0.0      | 0.0  | 0.0  | 0.2  |
| 4000–4250     | 1.5    | 2.1  | 4.1  | 0.0  | 0.0       | 0.1  | 0.1  | 0.0  | 0.0       | 0.0  | 0.0  | 0.0  | 0.0      | 0.0  | 0.0  | 0.5  |
| 4250–4500     | 1.4    | 2.1  | 5.9  | 0.0  | 0.0       | 0.0  | 0.1  | 0.0  | 0.0       | 0.0  | 0.0  | 0.0  | 0.0      | 0.0  | 0.0  | 0.1  |
| 4500–4750     | 1.0    | 2.1  | 3.6  | 0.0  | 0.0       | 0.0  | 0.1  | 0.0  | 0.0       | 0.0  | 0.0  | 0.0  | 0.0      | 0.0  | 0.0  | 0.0  |
| 4750–5000     | 0.6    | 2.1  | 2.3  | 0.0  | 0.0       | 0.0  | 0.1  | 0.0  | 0.0       | 0.0  | 0.0  | 0.0  | 0.0      | 0.0  | 0.0  | 0.0  |
| 5000–5250     | 0.3    | 1.3  | 1.1  | 0.0  | 0.0       | 0.0  | 0.1  | 0.0  | 0.0       | 0.0  | 0.0  | 0.0  | 0.0      | 0.0  | 0.0  | 0.0  |
| 5250–5500     | 0.2    | 0.8  | 1.0  | 0.0  | 0.0       | 0.0  | 0.0  | 0.0  | 0.0       | 0.0  | 0.0  | 0.0  | 0.0      | 0.0  | 0.0  | 0.0  |
| 5500–5750     | 0.1    | 0.5  | 0.4  | 0.0  | 0.0       | 0.0  | 0.0  | 0.0  | 0.0       | 0.0  | 0.0  | 0.0  | 0.0      | 0.0  | 0.0  | 0.0  |
| 5750–6000     | 0.1    | 0.3  | 0.2  | 0.0  | 0.0       | 0.0  | 0.0  | 0.0  | 0.0       | 0.0  | 0.0  | 0.0  | 0.0      | 0.0  | 0.0  | 0.0  |
| South America |        |      |      |      |           |      |      |      |           |      |      |      |          |      |      |      |
| 0–250         | 20.7   | 17.4 | 19.2 | 19.6 | 23.1      | 22.1 | 11.2 | 13.1 | 19.3      | 19.9 | 21.6 | 16.8 | 19.3     | 19.9 | 13.4 | 13.3 |
| 250–500       | 30.1   | 29.8 | 25.3 | 27.0 | 31.4      | 37.5 | 18.0 | 21.2 | 25.1      | 29.3 | 22.7 | 26.9 | 25.1     | 29.3 | 22.7 | 18.4 |
| 500–750       | 21.1   | 22.9 | 19.7 | 18.8 | 20.9      | 18.9 | 20.1 | 18.7 | 18.2      | 19.6 | 18.2 | 21.9 | 18.2     | 19.6 | 22.3 | 22.7 |
| 750–1000      | 9.4    | 14.9 | 13.3 | 14.1 | 10.2      | 9.9  | 16.7 | 14.1 | 14.8      | 12.5 | 12.1 | 14.1 | 14.8     | 12.5 | 18.9 | 23.4 |
| 1000–1250     | 5.7    | 8.2  | 8.0  | 9.7  | 6.3       | 5.0  | 10.9 | 11.9 | 9.3       | 7.7  | 8.2  | 7.6  | 9.3      | 7.7  | 11.2 | 9.9  |
| 1250–1500     | 6.4    | 3.7  | 4.8  | 5.0  | 4.0       | 2.9  | 6.6  | 7.2  | 5.3       | 4.7  | 5.0  | 4.9  | 5.3      | 4.7  | 5.1  | 5.8  |
| 1500–1750     | 4.0    | 1.6  | 2.9  | 2.5  | 1.7       | 1.8  | 3.7  | 5.2  | 4.2       | 2.6  | 3.7  | 3.2  | 4.2      | 2.6  | 2.5  | 3.0  |
| 1750–2000     | 1.5    | 0.7  | 1.9  | 1.4  | 0.8       | 0.7  | 2.4  | 2.9  | 1.9       | 1.4  | 2.4  | 1.8  | 1.9      | 1.4  | 1.9  | 1.4  |
| 2000–2050     | 0.4    | 0.3  | 1.3  | 1.0  | 0.6       | 0.5  | 1.7  | 2.5  | 0.7       | 0.9  | 1.7  | 1.2  | 1.0      | 1.0  | 0.9  | 0.8  |
| 2250–2500     | 0.3    | 0.2  | 1.0  | 0.3  | 0.4       | 0.3  | 1.5  | 1.0  | 0.5       | 0.6  | 1.4  | 0.7  | 0.4      | 0.6  | 0.4  | 0.7  |
| 2500–2750     | 0.2    | 0.2  | 0.7  | 0.2  | 0.3       | 0.2  | 1.3  | 0.5  | 0.3       | 0.4  | 0.8  | 0.3  | 0.2      | 0.3  | 0.2  | 0.1  |
| 2750–3000     | 0.1    | 0.1  | 0.4  | 0.1  | 0.2       | 0.1  | 0.7  | 0.6  | 0.2       | 0.2  | 0.7  | 0.3  | 0.1      | 0.2  | 0.2  | 0.1  |
| 3000–3250     | 0.1    | 0.0  | 0.4  | 0.2  | 0.1       | 0.1  | 0.4  | 0.3  | 0.1       | 0.1  | 0.5  | 0.1  | 0.1      | 0.1  | 0.2  | 0.4  |
| 3250–3500     | 0.0    | 0.0  | 0.3  | 0.1  | 0.0       | 0.0  | 0.4  | 0.2  | 0.1       | 0.1  | 0.4  | 0.1  | 0.1      | 0.1  | 0.1  | 0.0  |
| 3500–3749     | 0.0    | 0.0  | 0.2  | 0.0  | 0.0       | 0.0  | 0.3  | 0.1  | 0.0       | 0.0  | 0.3  | 0.1  | 0.0      | 0.0  | 0.0  | 0.0  |
| 3750–4000     | 0.0    | 0.0  | 0.2  | 0.0  | 0.0       | 0.0  | 0.3  | 0.1  | 0.0       | 0.0  | 0.2  | 0.0  | 0.0      | 0.0  | 0.0  | 0.0  |
| 4000–4250     | 0.0    | 0.0  | 0.1  | 0.0  | 0.0       | 0.0  | 0.6  | 0.3  | 0.0       | 0.0  | 0.1  | 0.0  | 0.0      | 0.0  | 0.0  | 0.0  |
| 4250–4500     | 0.0    | 0.0  | 0.1  | 0.0  | 0.0       | 0.0  | 1.3  | 0.0  | 0.0       | 0.0  | 0.0  | 0.0  | 0.0      | 0.0  | 0.0  | 0.0  |
| 4500–4750     | 0.0    | 0.0  | 0.1  | 0.0  | 0.0       | 0.0  | 1.1  | 0.1  | 0.0       | 0.0  | 0.0  | 0.0  | 0.0      | 0.0  | 0.0  | 0.0  |
| 4750–5000     | 0.0    | 0.0  | 0.1  | 0.0  | 0.0       | 0.0  | 0.4  | 0.0  | 0.0       | 0.0  | 0.0  | 0.0  | 0.0      | 0.0  | 0.0  | 0.0  |
| 5000–5250     | 0.0    | 0.0  | 0.0  | 0.0  | 0.0       | 0.0  | 0.1  | 0.0  | 0.0       | 0.0  | 0.0  | 0.0  | 0.0      | 0.0  | 0.0  | 0.0  |
| 5250–5500     | 0.0    | 0.0  | 0.0  | 0.0  | 0.0       | 0.0  | 0.1  | 0.0  | 0.0       | 0.0  | 0.0  | 0.0  | 0.0      | 0.0  | 0.0  | 0.0  |
| 5500–5750     | 0.0    | 0.0  | 0.0  | 0.0  | 0.0       | 0.0  | 0.1  | 0.0  | 0.0       | 0.0  | 0.0  | 0.0  | 0.0      | 0.0  | 0.0  | 0.0  |
| 5750–6000     | 0.0    | 0.0  | 0.0  | 0.0  | 0.0       | 0.0  | 0.1  | 0.0  | 0.0       | 0.0  | 0.0  | 0.0  | 0.0      | 0.0  | 0.0  | 0.0  |

**Table S4b.** Same as Table S4a, for Africa and Europe.

|           | Forest |      |      |      | Shrubland |      |      |      | Grassland |      |      |      | Cropland |      |      |      |
|-----------|--------|------|------|------|-----------|------|------|------|-----------|------|------|------|----------|------|------|------|
|           | MAM    | JJA  | SON  | DJF  | MAM       | JJA  | SON  | DJF  | MAM       | JJA  | SON  | DJF  | MAM      | JJA  | SON  | DJF  |
| Africa    |        |      |      |      |           |      |      |      |           |      |      |      |          |      |      |      |
| 0–250     | 16.1   | 17.6 | 6.3  | 12.5 | 16.7      | 10.7 | 7.2  | 11.5 | 7.4       | 12.0 | 6.9  | 9.4  | 7.4      | 12.0 | 13.4 | 13.0 |
| 250–500   | 29.5   | 37.3 | 9.6  | 14.0 | 22.8      | 22.3 | 16.5 | 24.6 | 14.2      | 23.1 | 17.5 | 20.1 | 14.2     | 23.1 | 20.2 | 25.9 |
| 500–750   | 24.0   | 19.4 | 11.7 | 14.6 | 18.9      | 22.4 | 19.7 | 22.3 | 17.4      | 19.2 | 17.9 | 19.5 | 17.4     | 19.2 | 18.3 | 24.9 |
| 750–1000  | 16.4   | 12.4 | 16.7 | 19.9 | 14.5      | 18.3 | 18.9 | 16.0 | 17.7      | 17.3 | 16.0 | 16.0 | 17.7     | 17.3 | 13.7 | 17.1 |
| 1000–1250 | 7.2    | 4.7  | 21.1 | 15.6 | 10.5      | 11.9 | 15.0 | 11.1 | 12.5      | 12.7 | 12.4 | 11.7 | 12.5     | 12.7 | 10.3 | 9.3  |
| 1250–1500 | 3.1    | 5.4  | 16.2 | 10.0 | 6.6       | 6.7  | 9.4  | 6.8  | 10.5      | 7.5  | 8.6  | 8.1  | 10.5     | 7.5  | 8.1  | 4.3  |
| 1500–1750 | 2.4    | 1.9  | 9.6  | 8.2  | 3.9       | 3.6  | 5.2  | 3.3  | 7.8       | 3.9  | 5.7  | 5.4  | 7.8      | 3.9  | 5.2  | 2.3  |
| 1750–2000 | 0.7    | 1.0  | 4.9  | 3.0  | 2.7       | 1.9  | 2.9  | 1.7  | 5.1       | 2.1  | 3.8  | 3.6  | 5.1      | 2.1  | 3.3  | 1.5  |
| 2000–2050 | 0.6    | 0.1  | 2.2  | 1.3  | 1.5       | 1.0  | 1.8  | 1.0  | 3.0       | 1.0  | 2.5  | 2.3  | 3.0      | 1.0  | 2.4  | 0.7  |
| 2250–2500 | 0.0    | 0.1  | 0.7  | 0.6  | 0.9       | 0.7  | 1.1  | 0.6  | 1.9       | 0.6  | 1.8  | 1.5  | 1.9      | 0.6  | 1.8  | 0.4  |
| 2500–2750 | 0.0    | 0.1  | 0.6  | 0.3  | 0.4       | 0.3  | 0.7  | 0.4  | 1.0       | 0.3  | 1.3  | 0.9  | 1.0      | 0.3  | 1.1  | 0.2  |
| 2750–3000 | 0.0    | 0.0  | 0.4  | 0.0  | 0.3       | 0.1  | 0.5  | 0.3  | 0.6       | 0.2  | 1.1  | 0.6  | 0.6      | 0.2  | 1.0  | 0.1  |
| 3000–3250 | 0.0    | 0.0  | 0.0  | 0.0  | 0.2       | 0.1  | 0.4  | 0.2  | 0.4       | 0.1  | 1.0  | 0.3  | 0.4      | 0.1  | 0.6  | 0.1  |
| 3250–3500 | 0.0    | 0.0  | 0.0  | 0.0  | 0.1       | 0.0  | 0.3  | 0.1  | 0.3       | 0.0  | 0.8  | 0.2  | 0.2      | 0.0  | 0.3  | 0.1  |
| 3500–3749 | 0.0    | 0.0  | 0.0  | 0.0  | 0.0       | 0.0  | 0.2  | 0.1  | 0.2       | 0.0  | 0.7  | 0.2  | 0.1      | 0.0  | 0.2  | 0.1  |
| 3750–4000 | 0.0    | 0.0  | 0.0  | 0.0  | 0.0       | 0.0  | 0.1  | 0.0  | 0.0       | 0.0  | 0.6  | 0.1  | 0.1      | 0.0  | 0.1  | 0.0  |
| 4000–4250 | 0.0    | 0.0  | 0.0  | 0.0  | 0.0       | 0.0  | 0.1  | 0.0  | 0.0       | 0.0  | 0.7  | 0.1  | 0.1      | 0.0  | 0.0  | 0.0  |
| 4250–4500 | 0.0    | 0.0  | 0.0  | 0.0  | 0.0       | 0.0  | 0.0  | 0.0  | 0.0       | 0.0  | 0.4  | 0.0  | 0.0      | 0.0  | 0.0  | 0.0  |
| 4500–4750 | 0.0    | 0.0  | 0.0  | 0.0  | 0.0       | 0.0  | 0.0  | 0.0  | 0.0       | 0.0  | 0.2  | 0.0  | 0.0      | 0.0  | 0.0  | 0.0  |
| 4750–5000 | 0.0    | 0.0  | 0.0  | 0.0  | 0.0       | 0.0  | 0.0  | 0.0  | 0.0       | 0.0  | 0.1  | 0.0  | 0.0      | 0.0  | 0.0  | 0.0  |
| 5000–5250 | 0.0    | 0.0  | 0.0  | 0.0  | 0.0       | 0.0  | 0.0  | 0.0  | 0.0       | 0.0  | 0.0  | 0.0  | 0.0      | 0.0  | 0.0  | 0.0  |
| 5250–5500 | 0.0    | 0.0  | 0.0  | 0.0  | 0.0       | 0.0  | 0.0  | 0.0  | 0.0       | 0.0  | 0.0  | 0.0  | 0.0      | 0.0  | 0.0  | 0.0  |
| 5500–5750 | 0.0    | 0.0  | 0.0  | 0.0  | 0.0       | 0.0  | 0.0  | 0.0  | 0.0       | 0.0  | 0.0  | 0.0  | 0.0      | 0.0  | 0.0  | 0.0  |
| 5750–6000 | 0.0    | 0.0  | 0.0  | 0.0  | 0.0       | 0.0  | 0.0  | 0.0  | 0.0       | 0.0  | 0.0  | 0.0  | 0.0      | 0.0  | 0.0  | 0.0  |
| Europe    |        |      |      |      |           |      |      |      |           |      |      |      |          |      |      |      |
| 0–250     | 10.4   | 30.8 | 28.2 | 29.2 | 11.2      | 11.4 | 40.5 | 38.5 | 33.3      | 20.6 | 7.8  | 8.8  | 33.3     | 20.6 | 18.0 | 31.5 |
| 250–500   | 14.3   | 26.4 | 23.9 | 23.5 | 6.0       | 7.4  | 34.0 | 35.1 | 31.1      | 24.7 | 12.9 | 12.8 | 31.1     | 24.7 | 20.4 | 27.2 |
| 500–750   | 14.3   | 19.6 | 14.3 | 14.1 | 9.6       | 8.9  | 25.5 | 26.4 | 18.6      | 15.6 | 18.0 | 17.8 | 18.6     | 15.6 | 16.8 | 22.1 |
| 750–1000  | 12.1   | 9.3  | 8.0  | 7.9  | 20.7      | 15.7 | 0.0  | 0.0  | 7.2       | 6.8  | 14.4 | 14.2 | 7.2      | 6.8  | 13.4 | 9.9  |
| 1000–1250 | 14.4   | 2.8  | 7.6  | 7.5  | 24.0      | 22.2 | 0.0  | 0.0  | 5.7       | 6.3  | 16.0 | 15.9 | 5.7      | 6.3  | 9.3  | 4.0  |
| 1250–1500 | 11.7   | 3.7  | 9.7  | 9.5  | 13.5      | 13.7 | 0.0  | 0.0  | 2.0       | 4.8  | 12.2 | 12.0 | 2.0      | 4.8  | 6.9  | 2.7  |
| 1500–1750 | 10.1   | 1.8  | 5.3  | 5.2  | 9.6       | 9.0  | 0.0  | 0.0  | 0.9       | 5.8  | 7.9  | 7.8  | 0.9      | 5.8  | 6.1  | 1.0  |
| 1750–2000 | 3.9    | 1.6  | 1.8  | 1.8  | 3.3       | 3.6  | 0.0  | 0.0  | 0.5       | 3.7  | 4.1  | 4.1  | 0.5      | 3.7  | 3.5  | 0.6  |
| 2000–2050 | 3.5    | 1.0  | 0.1  | 0.1  | 1.3       | 3.0  | 0.0  | 0.0  | 0.0       | 3.0  | 3.5  | 3.5  | 0.0      | 3.0  | 2.3  | 0.4  |
| 2250–2500 | 1.7    | 1.0  | 0.5  | 0.5  | 0.4       | 2.9  | 0.0  | 0.0  | 0.4       | 3.8  | 2.0  | 1.9  | 0.4      | 3.8  | 1.6  | 0.3  |
| 2500–2750 | 1.4    | 1.1  | 0.2  | 0.2  | 0.2       | 1.1  | 0.0  | 0.0  | 0.2       | 1.3  | 0.7  | 0.7  | 0.2      | 1.3  | 0.8  | 0.2  |
| 2750–3000 | 1.0    | 0.4  | 0.2  | 0.2  | 0.1       | 0.5  | 0.0  | 0.0  | 0.1       | 1.3  | 0.3  | 0.3  | 0.1      | 1.3  | 0.4  | 0.1  |
| 3000–3250 | 0.6    | 0.1  | 0.1  | 0.2  | 0.1       | 0.3  | 0.0  | 0.0  | 0.0       | 0.9  | 0.2  | 0.2  | 0.0      | 0.9  | 0.3  | 0.0  |
| 3250–3500 | 0.3    | 0.2  | 0.1  | 0.1  | 0.0       | 0.2  | 0.0  | 0.0  | 0.0       | 0.9  | 0.0  | 0.0  | 0.0      | 0.9  | 0.2  | 0.0  |
| 3500–3749 | 0.2    | 0.1  | 0.0  | 0.0  | 0.0       | 0.1  | 0.0  | 0.0  | 0.0       | 0.2  | 0.0  | 0.0  | 0.0      | 0.2  | 0.0  | 0.0  |
| 3750–4000 | 0.1    | 0.1  | 0.0  | 0.0  | 0.0       | 0.0  | 0.0  | 0.0  | 0.0       | 0.1  | 0.0  | 0.0  | 0.0      | 0.1  | 0.0  | 0.0  |
| 4000–4250 | 0.0    | 0.0  | 0.0  | 0.0  | 0.0       | 0.0  | 0.0  | 0.0  | 0.0       | 0.1  | 0.0  | 0.0  | 0.0      | 0.1  | 0.0  | 0.0  |
| 4250–4500 | 0.0    | 0.0  | 0.0  | 0.0  | 0.0       | 0.0  | 0.0  | 0.0  | 0.0       | 0.1  | 0.0  | 0.0  | 0.0      | 0.1  | 0.0  | 0.0  |
| 4500–4750 | 0.0    | 0.0  | 0.0  | 0.0  | 0.0       | 0.0  | 0.0  | 0.0  | 0.0       | 0.0  | 0.0  | 0.0  | 0.0      | 0.0  | 0.0  | 0.0  |
| 4750–5000 | 0.0    | 0.0  | 0.0  | 0.0  | 0.0       | 0.0  | 0.0  | 0.0  | 0.0       | 0.0  | 0.0  | 0.0  | 0.0      | 0.0  | 0.0  | 0.0  |
| 5000–5250 | 0.0    | 0.0  | 0.0  | 0.0  | 0.0       | 0.0  | 0.0  | 0.0  | 0.0       | 0.0  | 0.0  | 0.0  | 0.0      | 0.0  | 0.0  | 0.0  |
| 5250–5500 | 0.0    | 0.0  | 0.0  | 0.0  | 0.0       | 0.0  | 0.0  | 0.0  | 0.0       | 0.0  | 0.0  | 0.0  | 0.0      | 0.0  | 0.0  | 0.0  |
| 5500–5750 | 0.0    | 0.0  | 0.0  | 0.0  | 0.0       | 0.0  | 0.0  | 0.0  | 0.0       | 0.0  | 0.0  | 0.0  | 0.0      | 0.0  | 0.0  | 0.0  |
| 5750–6000 | 0.0    | 0.0  | 0.0  | 0.0  | 0.0       | 0.0  | 0.0  | 0.0  | 0.0       | 0.0  | 0.0  | 0.0  | 0.0      | 0.0  | 0.0  | 0.0  |

**Table S4c.** Same as Table S4a, for Boreal Eurasia and South Asia.

|                | Forest |      |      |      | Shrubland |      |      |      | Grassland |      |      |      | Cropland |      |      |      |
|----------------|--------|------|------|------|-----------|------|------|------|-----------|------|------|------|----------|------|------|------|
|                | MAM    | JJA  | SON  | DJF  | MAM       | JJA  | SON  | DJF  | MAM       | JJA  | SON  | DJF  | MAM      | JJA  | SON  | DJF  |
| Boreal Eurasia |        |      |      |      |           |      |      |      |           |      |      |      |          |      |      |      |
| 0–250          | 5.3    | 7.3  | 42.5 | 45.0 | 2.8       | 6.5  | 22.6 | 20.9 | 5.6       | 8.6  | 41.6 | 30.0 | 5.6      | 8.6  | 27.4 | 20.3 |
| 250–500        | 12.0   | 16.2 | 32.8 | 31.4 | 5.0       | 11.8 | 40.9 | 41.7 | 8.6       | 18.2 | 33.4 | 40.0 | 8.6      | 18.2 | 28.0 | 30.8 |
| 500–750        | 17.8   | 23.0 | 24.7 | 23.6 | 8.0       | 14.1 | 28.9 | 29.4 | 16.2      | 19.4 | 25.0 | 30.0 | 16.2     | 19.4 | 21.1 | 23.2 |
| 750–1000       | 20.4   | 19.9 | 0.0  | 0.0  | 18.7      | 14.5 | 3.6  | 3.9  | 18.1      | 19.7 | 0.0  | 0.0  | 18.1     | 19.7 | 10.7 | 11.7 |
| 1000–1250      | 15.6   | 13.3 | 0.0  | 0.0  | 19.0      | 14.7 | 1.5  | 1.5  | 13.7      | 15.6 | 0.0  | 0.0  | 13.7     | 15.6 | 6.2  | 6.9  |
| 1250–1500      | 11.2   | 8.1  | 0.0  | 0.0  | 9.2       | 12.8 | 1.4  | 1.4  | 12.2      | 8.3  | 0.0  | 0.0  | 12.2     | 8.3  | 2.7  | 3.0  |
| 1500–1750      | 7.6    | 5.2  | 0.0  | 0.0  | 7.6       | 10.4 | 0.7  | 0.8  | 9.1       | 4.5  | 0.0  | 0.0  | 9.1      | 4.5  | 2.3  | 2.5  |
| 1750–2000      | 4.0    | 3.2  | 0.0  | 0.0  | 6.2       | 6.8  | 0.2  | 0.2  | 6.1       | 2.4  | 0.0  | 0.0  | 6.1      | 2.4  | 0.9  | 1.0  |
| 2000–2050      | 2.5    | 1.8  | 0.0  | 0.0  | 4.8       | 4.0  | 0.2  | 0.2  | 4.1       | 1.6  | 0.0  | 0.0  | 4.1      | 1.6  | 0.6  | 0.6  |
| 2250–2500      | 1.6    | 1.0  | 0.0  | 0.0  | 6.9       | 2.1  | 0.0  | 0.0  | 2.8       | 0.9  | 0.0  | 0.0  | 2.8      | 0.7  | 0.1  | 0.0  |
| 2500–2750      | 0.9    | 0.5  | 0.0  | 0.0  | 4.8       | 1.1  | 0.0  | 0.0  | 1.6       | 0.3  | 0.0  | 0.0  | 1.6      | 0.5  | 0.0  | 0.0  |
| 2750–3000      | 0.5    | 0.3  | 0.0  | 0.0  | 3.3       | 0.6  | 0.0  | 0.0  | 0.9       | 0.2  | 0.0  | 0.0  | 1.1      | 0.2  | 0.0  | 0.0  |
| 3000–3250      | 0.3    | 0.1  | 0.0  | 0.0  | 2.2       | 0.3  | 0.0  | 0.0  | 0.7       | 0.1  | 0.0  | 0.0  | 0.6      | 0.1  | 0.0  | 0.0  |
| 3250–3500      | 0.2    | 0.1  | 0.0  | 0.0  | 1.2       | 0.2  | 0.0  | 0.0  | 0.3       | 0.1  | 0.0  | 0.0  | 0.2      | 0.1  | 0.0  | 0.0  |
| 3500–3749      | 0.1    | 0.0  | 0.0  | 0.0  | 0.2       | 0.1  | 0.0  | 0.0  | 0.0       | 0.1  | 0.0  | 0.0  | 0.0      | 0.1  | 0.0  | 0.0  |
| 3750–4000      | 0.0    | 0.0  | 0.0  | 0.0  | 0.1       | 0.0  | 0.0  | 0.0  | 0.0       | 0.0  | 0.0  | 0.0  | 0.0      | 0.0  | 0.0  | 0.0  |
| 4000–4250      | 0.0    | 0.0  | 0.0  | 0.0  | 0.0       | 0.0  | 0.0  | 0.0  | 0.0       | 0.0  | 0.0  | 0.0  | 0.0      | 0.0  | 0.0  | 0.0  |
| 4250–4500      | 0.0    | 0.0  | 0.0  | 0.0  | 0.0       | 0.0  | 0.0  | 0.0  | 0.0       | 0.0  | 0.0  | 0.0  | 0.0      | 0.0  | 0.0  | 0.0  |
| 4500–4750      | 0.0    | 0.0  | 0.0  | 0.0  | 0.0       | 0.0  | 0.0  | 0.0  | 0.0       | 0.0  | 0.0  | 0.0  | 0.0      | 0.0  | 0.0  | 0.0  |
| 4750–5000      | 0.0    | 0.0  | 0.0  | 0.0  | 0.0       | 0.0  | 0.0  | 0.0  | 0.0       | 0.0  | 0.0  | 0.0  | 0.0      | 0.0  | 0.0  | 0.0  |
| 5000–5250      | 0.0    | 0.0  | 0.0  | 0.0  | 0.0       | 0.0  | 0.0  | 0.0  | 0.0       | 0.0  | 0.0  | 0.0  | 0.0      | 0.0  | 0.0  | 0.0  |
| 5250–5500      | 0.0    | 0.0  | 0.0  | 0.0  | 0.0       | 0.0  | 0.0  | 0.0  | 0.0       | 0.0  | 0.0  | 0.0  | 0.0      | 0.0  | 0.0  | 0.0  |
| 5500–5750      | 0.0    | 0.0  | 0.0  | 0.0  | 0.0       | 0.0  | 0.0  | 0.0  | 0.0       | 0.0  | 0.0  | 0.0  | 0.0      | 0.0  | 0.0  | 0.0  |
| 5750–6000      | 0.0    | 0.0  | 0.0  | 0.0  | 0.0       | 0.0  | 0.0  | 0.0  | 0.0       | 0.0  | 0.0  | 0.0  | 0.0      | 0.0  | 0.0  | 0.0  |
| South Asia     |        |      |      |      |           |      |      |      |           |      |      |      |          |      |      |      |
| 0–250          | 19.3   | 3.8  | 15.0 | 26.1 | 17.9      | 17.5 | 8.2  | 15.0 | 7.0       | 4.5  | 10.2 | 5.9  | 7.0      | 4.5  | 21.3 | 23.0 |
| 250–500        | 19.2   | 8.8  | 18.7 | 25.5 | 18.7      | 18.4 | 23.6 | 22.7 | 11.0      | 9.5  | 19.8 | 37.8 | 11.0     | 9.5  | 34.5 | 28.6 |
| 500–750        | 16.5   | 16.9 | 14.2 | 19.1 | 16.8      | 18.9 | 21.2 | 26.4 | 14.0      | 9.9  | 18.5 | 21.8 | 14.0     | 9.9  | 21.7 | 20.1 |
| 750–1000       | 14.6   | 16.0 | 20.7 | 12.1 | 13.7      | 14.7 | 15.1 | 18.6 | 13.4      | 10.7 | 15.7 | 16.0 | 13.4     | 10.7 | 11.4 | 12.7 |
| 1000–1250      | 10.7   | 15.2 | 13.0 | 8.9  | 11.3      | 8.9  | 8.9  | 7.4  | 13.8      | 11.1 | 11.7 | 8.7  | 13.8     | 11.1 | 5.2  | 6.3  |
| 1250–1500      | 7.9    | 14.6 | 8.2  | 4.3  | 7.6       | 5.2  | 8.1  | 4.8  | 13.2      | 11.8 | 7.2  | 5.1  | 13.2     | 11.8 | 2.8  | 3.6  |
| 1500–1750      | 5.5    | 12.4 | 5.4  | 2.0  | 4.4       | 4.5  | 8.5  | 2.3  | 10.5      | 12.6 | 6.9  | 2.6  | 10.5     | 12.6 | 1.6  | 2.0  |
| 1750–2000      | 2.9    | 7.9  | 4.0  | 1.0  | 3.2       | 2.2  | 3.1  | 0.9  | 7.3       | 11.0 | 4.6  | 0.2  | 7.3      | 11.0 | 0.5  | 1.5  |
| 2000–2050      | 1.5    | 2.7  | 0.3  | 0.5  | 2.1       | 2.2  | 1.3  | 0.5  | 4.1       | 6.9  | 2.1  | 1.1  | 4.1      | 6.9  | 0.5  | 1.0  |
| 2250–2500      | 0.7    | 0.8  | 0.2  | 0.2  | 1.6       | 1.4  | 1.2  | 0.5  | 2.3       | 4.8  | 1.3  | 0.4  | 2.3      | 4.8  | 0.3  | 0.4  |
| 2500–2750      | 0.5    | 0.3  | 0.1  | 0.1  | 1.3       | 1.2  | 0.1  | 0.2  | 1.3       | 2.5  | 0.6  | 0.3  | 1.2      | 2.6  | 0.1  | 0.3  |
| 2750–3000      | 0.4    | 0.3  | 0.1  | 0.1  | 0.6       | 1.1  | 0.1  | 0.1  | 0.8       | 1.4  | 0.5  | 0.1  | 0.8      | 1.4  | 0.1  | 0.2  |
| 3000–3250      | 0.2    | 0.2  | 0.1  | 0.1  | 0.3       | 1.2  | 0.0  | 0.2  | 0.5       | 0.9  | 0.3  | 0.0  | 0.5      | 0.9  | 0.0  | 0.2  |
| 3250–3500      | 0.1    | 0.1  | 0.0  | 0.0  | 0.2       | 0.9  | 0.0  | 0.2  | 0.3       | 0.5  | 0.1  | 0.0  | 0.4      | 0.5  | 0.0  | 0.1  |
| 3500–3749      | 0.0    | 0.0  | 0.0  | 0.0  | 0.1       | 0.7  | 0.3  | 0.1  | 0.2       | 0.3  | 0.1  | 0.0  | 0.2      | 0.4  | 0.0  | 0.0  |
| 3750–4000      | 0.0    | 0.0  | 0.0  | 0.0  | 0.1       | 0.5  | 0.2  | 0.1  | 0.1       | 0.3  | 0.1  | 0.0  | 0.1      | 0.3  | 0.0  | 0.0  |
| 4000–4250      | 0.0    | 0.0  | 0.0  | 0.0  | 0.1       | 0.2  | 0.1  | 0.0  | 0.1       | 0.3  | 0.1  | 0.0  | 0.1      | 0.3  | 0.0  | 0.0  |
| 4250–4500      | 0.0    | 0.0  | 0.0  | 0.0  | 0.0       | 0.2  | 0.0  | 0.0  | 0.1       | 0.3  | 0.1  | 0.0  | 0.1      | 0.3  | 0.0  | 0.0  |
| 4500–4750      | 0.0    | 0.0  | 0.0  | 0.0  | 0.0       | 0.1  | 0.0  | 0.0  | 0.0       | 0.2  | 0.1  | 0.0  | 0.0      | 0.2  | 0.0  | 0.0  |
| 4750–5000      | 0.0    | 0.0  | 0.0  | 0.0  | 0.0       | 0.0  | 0.0  | 0.0  | 0.0       | 0.2  | 0.0  | 0.0  | 0.0      | 0.1  | 0.0  | 0.0  |
| 5000–5250      | 0.0    | 0.0  | 0.0  | 0.0  | 0.0       | 0.0  | 0.0  | 0.0  | 0.0       | 0.2  | 0.0  | 0.0  | 0.0      | 0.1  | 0.0  | 0.0  |
| 5250–5500      | 0.0    | 0.0  | 0.0  | 0.0  | 0.0       | 0.0  | 0.0  | 0.0  | 0.0       | 0.1  | 0.0  | 0.0  | 0.0      | 0.1  | 0.0  | 0.0  |
| 5500–5750      | 0.0    | 0.0  | 0.0  | 0.0  | 0.0       | 0.0  | 0.0  | 0.0  | 0.0       | 0.0  | 0.0  | 0.0  | 0.0      | 0.0  | 0.0  | 0.0  |
| 5750–6000      | 0.0    | 0.0  | 0.0  | 0.0  | 0.0       | 0.0  | 0.0  | 0.0  | 0.0       | 0.0  | 0.0  | 0.0  | 0.0      | 0.0  | 0.0  | 0.0  |

**Table S4d.** Same as Table S4a for Australia.

|           | Forest    |      |      |      |      | Shrubland |      |      |      |      | Grassland |      |      |      |      | Cropland |     |     |     |
|-----------|-----------|------|------|------|------|-----------|------|------|------|------|-----------|------|------|------|------|----------|-----|-----|-----|
|           | MAM       | JJA  | SON  | DJF  |      | MAM       | JJA  | SON  | DJF  |      | MAM       | JJA  | SON  | DJF  |      | MAM      | JJA | SON | DJF |
|           | Australia |      |      |      |      |           |      |      |      |      |           |      |      |      |      |          |     |     |     |
| 0–250     | 15.7      | 18.5 | 24.3 | 17.5 | 14.1 | 18.2      | 12.9 | 5.8  | 25.9 | 15.8 | 6.5       | 18.6 | 25.9 | 15.8 | 43.9 | 43.3     |     |     |     |
| 250–500   | 24.2      | 23.4 | 23.8 | 26.6 | 26.5 | 30.7      | 17.8 | 9.2  | 24.6 | 28.4 | 13.0      | 22.7 | 24.6 | 28.4 | 32.1 | 32.4     |     |     |     |
| 500–750   | 19.4      | 18.7 | 22.7 | 34.4 | 20.2 | 25.3      | 17.3 | 8.5  | 18.8 | 22.0 | 14.6      | 16.3 | 18.8 | 22.0 | 24.0 | 24.3     |     |     |     |
| 750–1000  | 19.1      | 18.4 | 11.7 | 9.2  | 12.9 | 13.6      | 15.0 | 9.7  | 12.6 | 14.6 | 18.3      | 11.8 | 12.6 | 14.6 | 0.0  | 0.0      |     |     |     |
| 1000–1250 | 12.8      | 12.4 | 7.4  | 5.7  | 7.9  | 6.0       | 11.9 | 11.3 | 7.5  | 10.2 | 18.1      | 7.3  | 7.5  | 10.2 | 0.0  | 0.0      |     |     |     |
| 1250–1500 | 4.6       | 4.5  | 5.5  | 3.7  | 5.8  | 2.8       | 7.1  | 12.5 | 4.5  | 5.1  | 12.1      | 6.6  | 4.5  | 5.1  | 0.0  | 0.0      |     |     |     |
| 1500–1750 | 2.1       | 2.0  | 2.4  | 1.6  | 4.1  | 1.4       | 4.6  | 11.6 | 2.3  | 2.0  | 7.4       | 5.0  | 2.3  | 2.0  | 0.0  | 0.0      |     |     |     |
| 1750–2000 | 0.9       | 0.8  | 1.3  | 0.7  | 2.6  | 0.8       | 3.5  | 10.0 | 1.5  | 0.9  | 4.6       | 4.1  | 1.5  | 0.9  | 0.0  | 0.0      |     |     |     |
| 2000–2050 | 0.7       | 0.7  | 0.6  | 0.4  | 2.0  | 0.6       | 2.7  | 6.3  | 1.0  | 0.4  | 2.5       | 2.8  | 0.9  | 0.4  | 0.0  | 0.0      |     |     |     |
| 2250–2500 | 0.3       | 0.4  | 0.2  | 0.2  | 1.1  | 0.2       | 2.0  | 4.9  | 0.6  | 0.2  | 1.4       | 2.2  | 0.6  | 0.2  | 0.0  | 0.0      |     |     |     |
| 2500–2750 | 0.2       | 0.2  | 0.1  | 0.0  | 0.8  | 0.2       | 1.3  | 3.4  | 0.3  | 0.2  | 0.8       | 1.8  | 0.4  | 0.2  | 0.0  | 0.0      |     |     |     |
| 2750–3000 | 0.0       | 0.0  | 0.0  | 0.0  | 0.6  | 0.1       | 0.8  | 2.7  | 0.2  | 0.1  | 0.4       | 0.5  | 0.2  | 0.1  | 0.0  | 0.0      |     |     |     |
| 3000–3250 | 0.0       | 0.0  | 0.0  | 0.0  | 0.5  | 0.1       | 1.1  | 1.5  | 0.1  | 0.1  | 0.2       | 0.1  | 0.1  | 0.1  | 0.0  | 0.0      |     |     |     |
| 3250–3500 | 0.0       | 0.0  | 0.0  | 0.0  | 0.4  | 0.0       | 0.6  | 1.0  | 0.1  | 0.0  | 0.1       | 0.2  | 0.1  | 0.0  | 0.0  | 0.0      |     |     |     |
| 3500–3749 | 0.0       | 0.0  | 0.0  | 0.0  | 0.2  | 0.0       | 0.4  | 0.7  | 0.0  | 0.0  | 0.0       | 0.0  | 0.0  | 0.0  | 0.0  | 0.0      |     |     |     |
| 3750–4000 | 0.0       | 0.0  | 0.0  | 0.0  | 0.1  | 0.0       | 0.4  | 0.4  | 0.0  | 0.0  | 0.0       | 0.0  | 0.0  | 0.0  | 0.0  | 0.0      |     |     |     |
| 4000–4250 | 0.0       | 0.0  | 0.0  | 0.0  | 0.1  | 0.0       | 0.3  | 0.3  | 0.0  | 0.0  | 0.0       | 0.0  | 0.0  | 0.0  | 0.0  | 0.0      |     |     |     |
| 4250–4500 | 0.0       | 0.0  | 0.0  | 0.0  | 0.1  | 0.0       | 0.1  | 0.2  | 0.0  | 0.0  | 0.0       | 0.0  | 0.0  | 0.0  | 0.0  | 0.0      |     |     |     |
| 4500–4750 | 0.0       | 0.0  | 0.0  | 0.0  | 0.0  | 0.0       | 0.1  | 0.0  | 0.0  | 0.0  | 0.0       | 0.0  | 0.0  | 0.0  | 0.0  | 0.0      |     |     |     |
| 4750–5000 | 0.0       | 0.0  | 0.0  | 0.0  | 0.0  | 0.0       | 0.1  | 0.0  | 0.0  | 0.0  | 0.0       | 0.0  | 0.0  | 0.0  | 0.0  | 0.0      |     |     |     |
| 5000–5250 | 0.0       | 0.0  | 0.0  | 0.0  | 0.0  | 0.0       | 0.0  | 0.0  | 0.0  | 0.0  | 0.0       | 0.0  | 0.0  | 0.0  | 0.0  | 0.0      |     |     |     |
| 5250–5500 | 0.0       | 0.0  | 0.0  | 0.0  | 0.0  | 0.0       | 0.0  | 0.0  | 0.0  | 0.0  | 0.0       | 0.0  | 0.0  | 0.0  | 0.0  | 0.0      |     |     |     |
| 5500–5750 | 0.0       | 0.0  | 0.0  | 0.0  | 0.0  | 0.0       | 0.0  | 0.0  | 0.0  | 0.0  | 0.0       | 0.0  | 0.0  | 0.0  | 0.0  | 0.0      |     |     |     |
| 5750–6000 | 0.0       | 0.0  | 0.0  | 0.0  | 0.0  | 0.0       | 0.0  | 0.0  | 0.0  | 0.0  | 0.0       | 0.0  | 0.0  | 0.0  | 0.0  | 0.0      |     |     |     |

**Table S5a.** Pixel-weighted percentages of fire smoke injection heights per fire region, broad biomes and seasons, for North and South America. Note that percentages are above ground level.

|               | Forest |      |      |      | Shrubland |      |      |      | Grassland |      |      |      | Cropland |      |      |      |
|---------------|--------|------|------|------|-----------|------|------|------|-----------|------|------|------|----------|------|------|------|
|               | MAM    | JJA  | SON  | DJF  | MAM       | JJA  | SON  | DJF  | MAM       | JJA  | SON  | DJF  | MAM      | JJA  | SON  | DJF  |
| North America |        |      |      |      |           |      |      |      |           |      |      |      |          |      |      |      |
| 0–250         | 15.6   | 7.6  | 9.2  | 12.9 | 15.9      | 8.0  | 23.5 | 19.3 | 20.2      | 3.4  | 14.8 | 12.6 | 20.2     | 3.4  | 15.1 | 6.4  |
| 250–500       | 17.2   | 11.5 | 13.7 | 34.6 | 18.8      | 13.1 | 21.9 | 30.2 | 29.7      | 9.8  | 29.1 | 19.6 | 29.7     | 9.8  | 35.5 | 31.3 |
| 500–750       | 17.2   | 13.1 | 10.8 | 25.3 | 19.0      | 14.3 | 16.2 | 20.1 | 21.7      | 15.5 | 19.0 | 29.5 | 21.7     | 15.5 | 14.7 | 21.2 |
| 750–1000      | 14.0   | 11.7 | 8.3  | 11.1 | 14.6      | 15.2 | 10.6 | 11.6 | 12.1      | 16.9 | 11.2 | 13.9 | 12.1     | 16.9 | 9.8  | 15.6 |
| 1000–1250     | 8.4    | 10.9 | 7.0  | 4.0  | 11.4      | 13.7 | 8.8  | 7.8  | 7.2       | 15.0 | 8.7  | 12.9 | 7.2      | 15.0 | 12.5 | 8.6  |
| 1250–1500     | 6.2    | 9.1  | 5.7  | 2.5  | 8.4       | 9.4  | 6.3  | 3.9  | 3.9       | 11.3 | 6.3  | 7.1  | 3.9      | 11.3 | 6.5  | 6.8  |
| 1500–1750     | 3.9    | 6.5  | 4.6  | 2.5  | 5.0       | 6.3  | 4.1  | 2.6  | 2.3       | 9.0  | 4.3  | 1.7  | 2.3      | 9.0  | 3.3  | 3.8  |
| 1750–2000     | 2.5    | 4.9  | 4.1  | 1.9  | 3.1       | 5.2  | 3.0  | 1.9  | 1.3       | 6.2  | 2.8  | 1.7  | 1.3      | 6.2  | 1.6  | 1.5  |
| 2000–2050     | 1.6    | 3.8  | 3.3  | 1.9  | 1.8       | 5.3  | 1.6  | 1.3  | 0.6       | 4.0  | 1.9  | 0.2  | 0.6      | 4.0  | 0.5  | 1.4  |
| 2250–2500     | 1.3    | 3.3  | 2.7  | 0.7  | 0.8       | 4.2  | 1.2  | 0.7  | 0.4       | 2.8  | 1.0  | 0.2  | 0.5      | 2.8  | 0.3  | 1.0  |
| 2500–2750     | 1.2    | 2.9  | 2.4  | 0.4  | 0.4       | 2.4  | 1.1  | 0.5  | 0.3       | 1.8  | 0.4  | 0.2  | 0.4      | 1.8  | 0.2  | 0.6  |
| 2750–3000     | 1.5    | 2.4  | 1.7  | 0.7  | 0.3       | 1.0  | 0.9  | 0.0  | 0.2       | 1.6  | 0.3  | 0.2  | 0.1      | 1.6  | 0.0  | 0.4  |
| 3000–3250     | 1.5    | 2.0  | 1.9  | 0.2  | 0.2       | 0.8  | 0.4  | 0.0  | 0.1       | 1.0  | 0.1  | 0.2  | 0.0      | 1.0  | 0.0  | 0.6  |
| 3250–3500     | 1.6    | 1.6  | 2.0  | 0.4  | 0.1       | 0.7  | 0.2  | 0.0  | 0.0       | 0.7  | 0.1  | 0.0  | 0.0      | 0.7  | 0.0  | 0.1  |
| 3500–3749     | 1.5    | 1.4  | 2.2  | 0.9  | 0.1       | 0.2  | 0.1  | 0.0  | 0.0       | 0.3  | 0.0  | 0.0  | 0.0      | 0.3  | 0.0  | 0.1  |
| 3750–4000     | 1.4    | 1.2  | 2.6  | 0.0  | 0.1       | 0.1  | 0.1  | 0.0  | 0.0       | 0.2  | 0.0  | 0.0  | 0.0      | 0.2  | 0.0  | 0.1  |
| 4000–4250     | 1.2    | 1.2  | 3.6  | 0.0  | 0.0       | 0.1  | 0.0  | 0.0  | 0.0       | 0.1  | 0.0  | 0.0  | 0.0      | 0.1  | 0.0  | 0.3  |
| 4250–4500     | 0.8    | 1.2  | 5.1  | 0.0  | 0.0       | 0.0  | 0.0  | 0.1  | 0.0       | 0.2  | 0.0  | 0.0  | 0.0      | 0.2  | 0.0  | 0.1  |
| 4500–4750     | 0.6    | 1.1  | 3.2  | 0.0  | 0.0       | 0.0  | 0.0  | 0.0  | 0.0       | 0.1  | 0.0  | 0.0  | 0.0      | 0.1  | 0.0  | 0.1  |
| 4750–5000     | 0.4    | 1.0  | 2.2  | 0.0  | 0.0       | 0.0  | 0.0  | 0.0  | 0.0       | 0.1  | 0.0  | 0.0  | 0.0      | 0.1  | 0.0  | 0.0  |
| 5000–5250     | 0.2    | 0.7  | 1.2  | 0.0  | 0.0       | 0.0  | 0.0  | 0.0  | 0.0       | 0.0  | 0.0  | 0.0  | 0.0      | 0.0  | 0.0  | 0.0  |
| 5250–5500     | 0.1    | 0.4  | 1.2  | 0.0  | 0.0       | 0.0  | 0.0  | 0.0  | 0.0       | 0.0  | 0.0  | 0.0  | 0.0      | 0.0  | 0.0  | 0.0  |
| 5500–5750     | 0.1    | 0.3  | 0.7  | 0.0  | 0.0       | 0.0  | 0.0  | 0.0  | 0.0       | 0.0  | 0.0  | 0.0  | 0.0      | 0.0  | 0.0  | 0.0  |
| 5750–6000     | 0.0    | 0.2  | 0.6  | 0.0  | 0.0       | 0.0  | 0.0  | 0.0  | 0.0       | 0.0  | 0.0  | 0.0  | 0.0      | 0.0  | 0.0  | 0.0  |
| South America |        |      |      |      |           |      |      |      |           |      |      |      |          |      |      |      |
| 0–250         | 24.1   | 21.8 | 18.9 | 20.2 | 24.2      | 21.9 | 12.6 | 13.1 | 22.3      | 19.9 | 19.4 | 16.9 | 22.3     | 19.9 | 16.1 | 15.0 |
| 250–500       | 30.2   | 31.5 | 24.7 | 25.9 | 31.6      | 35.5 | 19.9 | 20.3 | 27.0      | 27.3 | 22.6 | 27.4 | 27.0     | 27.3 | 21.6 | 19.2 |
| 500–750       | 18.5   | 20.8 | 19.4 | 19.6 | 20.9      | 18.8 | 19.6 | 18.6 | 18.7      | 18.3 | 18.6 | 21.3 | 18.7     | 18.3 | 18.8 | 22.7 |
| 750–1000      | 10.3   | 12.6 | 13.6 | 14.3 | 9.3       | 10.6 | 16.1 | 15.0 | 12.7      | 12.2 | 13.0 | 14.1 | 12.7     | 12.2 | 19.0 | 21.4 |
| 1000–1250     | 4.5    | 6.5  | 8.5  | 9.3  | 6.5       | 5.6  | 10.8 | 11.7 | 7.7       | 8.4  | 8.7  | 7.8  | 7.7      | 8.4  | 11.9 | 9.3  |
| 1250–1500     | 4.0    | 3.1  | 5.2  | 4.8  | 3.8       | 3.2  | 6.9  | 7.4  | 5.1       | 5.2  | 5.5  | 5.1  | 5.1      | 5.2  | 5.8  | 5.7  |
| 1500–1750     | 2.3    | 1.6  | 3.1  | 2.5  | 1.8       | 1.9  | 4.0  | 5.7  | 3.4       | 3.2  | 3.9  | 3.0  | 3.4      | 3.2  | 3.2  | 3.2  |
| 1750–2000     | 1.4    | 0.9  | 2.2  | 1.3  | 0.8       | 0.9  | 2.6  | 3.1  | 1.6       | 2.0  | 2.5  | 1.8  | 1.6      | 2.0  | 1.8  | 1.5  |
| 2000–2050     | 0.7    | 0.5  | 1.4  | 1.0  | 0.6       | 0.6  | 1.6  | 2.1  | 0.7       | 1.5  | 1.7  | 1.2  | 0.7      | 1.5  | 0.6  | 0.8  |
| 2250–2500     | 1.0    | 0.3  | 0.9  | 0.4  | 0.3       | 0.4  | 1.2  | 1.1  | 0.4       | 0.8  | 1.3  | 0.6  | 0.4      | 0.8  | 0.5  | 0.6  |
| 2500–2750     | 0.8    | 0.2  | 0.6  | 0.2  | 0.2       | 0.2  | 1.1  | 0.5  | 0.2       | 0.5  | 0.8  | 0.3  | 0.2      | 0.5  | 0.2  | 0.3  |
| 2750–3000     | 0.7    | 0.1  | 0.4  | 0.1  | 0.0       | 0.1  | 0.6  | 0.4  | 0.1       | 0.3  | 0.7  | 0.3  | 0.1      | 0.3  | 0.1  | 0.2  |
| 3000–3250     | 0.6    | 0.1  | 0.3  | 0.3  | 0.0       | 0.1  | 0.4  | 0.4  | 0.1       | 0.2  | 0.5  | 0.1  | 0.1      | 0.2  | 0.2  | 0.1  |
| 3250–3500     | 0.3    | 0.0  | 0.2  | 0.1  | 0.0       | 0.1  | 0.4  | 0.1  | 0.0       | 0.1  | 0.3  | 0.1  | 0.0      | 0.1  | 0.2  | 0.0  |
| 3500–3749     | 0.4    | 0.0  | 0.2  | 0.0  | 0.0       | 0.1  | 0.2  | 0.1  | 0.0       | 0.1  | 0.2  | 0.0  | 0.0      | 0.1  | 0.0  | 0.0  |
| 3750–4000     | 0.1    | 0.0  | 0.1  | 0.0  | 0.0       | 0.0  | 0.2  | 0.1  | 0.0       | 0.0  | 0.2  | 0.0  | 0.0      | 0.0  | 0.0  | 0.0  |
| 4000–4250     | 0.1    | 0.0  | 0.1  | 0.0  | 0.0       | 0.0  | 0.3  | 0.2  | 0.0       | 0.0  | 0.1  | 0.0  | 0.0      | 0.0  | 0.0  | 0.0  |
| 4250–4500     | 0.0    | 0.0  | 0.1  | 0.0  | 0.0       | 0.0  | 0.6  | 0.1  | 0.0       | 0.0  | 0.0  | 0.0  | 0.0      | 0.0  | 0.0  | 0.0  |
| 4500–4750     | 0.0    | 0.0  | 0.1  | 0.0  | 0.0       | 0.0  | 0.6  | 0.0  | 0.0       | 0.0  | 0.0  | 0.0  | 0.0      | 0.0  | 0.0  | 0.0  |
| 4750–5000     | 0.0    | 0.0  | 0.0  | 0.0  | 0.0       | 0.0  | 0.2  | 0.0  | 0.0       | 0.0  | 0.0  | 0.0  | 0.0      | 0.0  | 0.0  | 0.0  |
| 5000–5250     | 0.0    | 0.0  | 0.0  | 0.0  | 0.0       | 0.0  | 0.1  | 0.0  | 0.0       | 0.0  | 0.0  | 0.0  | 0.0      | 0.0  | 0.0  | 0.0  |
| 5250–5500     | 0.0    | 0.0  | 0.0  | 0.0  | 0.0       | 0.0  | 0.0  | 0.0  | 0.0       | 0.0  | 0.0  | 0.0  | 0.0      | 0.0  | 0.0  | 0.0  |
| 5500–5750     | 0.0    | 0.0  | 0.0  | 0.0  | 0.0       | 0.0  | 0.0  | 0.0  | 0.0       | 0.0  | 0.0  | 0.0  | 0.0      | 0.0  | 0.0  | 0.0  |
| 5750–6000     | 0.0    | 0.0  | 0.0  | 0.0  | 0.0       | 0.0  | 0.0  | 0.0  | 0.0       | 0.0  | 0.0  | 0.0  | 0.0      | 0.0  | 0.0  | 0.0  |



**Table S5b.** Same as Table S5a for Africa and Europe.

|           | Forest |      |      |      | Shrubland |      |      |      | Grassland |      |      |      | Cropland |      |      |      |
|-----------|--------|------|------|------|-----------|------|------|------|-----------|------|------|------|----------|------|------|------|
|           | MAM    | JJA  | SON  | DJF  | MAM       | JJA  | SON  | DJF  | MAM       | JJA  | SON  | DJF  | MAM      | JJA  | SON  | DJF  |
| Africa    |        |      |      |      |           |      |      |      |           |      |      |      |          |      |      |      |
| 0–250     | 15.9   | 15.2 | 8.5  | 13.9 | 17.5      | 10.9 | 7.8  | 12.1 | 9.4       | 12.4 | 8.5  | 10.0 | 9.4      | 12.4 | 14.6 | 13.7 |
| 250–500   | 28.3   | 29.8 | 14.2 | 17.7 | 25.1      | 22.9 | 17.7 | 25.3 | 16.2      | 22.5 | 20.3 | 20.8 | 16.2     | 22.5 | 23.0 | 24.8 |
| 500–750   | 25.5   | 24.7 | 16.5 | 17.9 | 20.2      | 22.5 | 19.6 | 21.8 | 18.0      | 19.2 | 19.0 | 19.7 | 18.0     | 19.2 | 18.2 | 23.8 |
| 750–1000  | 17.8   | 15.0 | 17.0 | 18.5 | 13.8      | 18.1 | 18.5 | 15.4 | 17.1      | 17.3 | 16.7 | 15.8 | 17.1     | 17.3 | 13.3 | 17.0 |
| 1000–1250 | 6.5    | 6.0  | 17.9 | 13.4 | 9.3       | 11.5 | 14.5 | 10.8 | 11.6      | 12.7 | 12.5 | 11.6 | 11.6     | 12.7 | 9.6  | 9.7  |
| 1250–1500 | 3.0    | 5.8  | 12.3 | 8.3  | 5.8       | 6.7  | 9.2  | 6.7  | 9.5       | 7.4  | 8.4  | 7.8  | 9.5      | 7.4  | 7.6  | 4.6  |
| 1500–1750 | 1.9    | 2.0  | 7.1  | 5.9  | 3.5       | 3.5  | 5.1  | 3.4  | 7.0       | 3.9  | 5.1  | 5.1  | 7.0      | 3.9  | 4.6  | 2.7  |
| 1750–2000 | 0.6    | 0.8  | 3.4  | 2.3  | 2.1       | 1.9  | 2.8  | 1.9  | 4.5       | 2.2  | 3.2  | 3.3  | 4.5      | 2.2  | 2.8  | 1.8  |
| 2000–2050 | 0.5    | 0.3  | 1.5  | 1.2  | 1.1       | 1.0  | 1.7  | 1.0  | 2.7       | 1.1  | 2.0  | 2.1  | 2.7      | 1.1  | 2.0  | 0.9  |
| 2250–2500 | 0.0    | 0.2  | 0.6  | 0.6  | 0.7       | 0.6  | 1.0  | 0.6  | 1.7       | 0.6  | 1.3  | 1.4  | 1.7      | 0.6  | 1.5  | 0.5  |
| 2500–2750 | 0.0    | 0.1  | 0.7  | 0.3  | 0.4       | 0.2  | 0.7  | 0.4  | 0.9       | 0.3  | 0.8  | 0.9  | 0.9      | 0.3  | 0.9  | 0.2  |
| 2750–3000 | 0.0    | 0.1  | 0.3  | 0.0  | 0.3       | 0.1  | 0.5  | 0.2  | 0.5       | 0.2  | 0.6  | 0.6  | 0.5      | 0.2  | 0.7  | 0.2  |
| 3000–3250 | 0.0    | 0.0  | 0.0  | 0.0  | 0.2       | 0.1  | 0.3  | 0.2  | 0.4       | 0.1  | 0.4  | 0.3  | 0.4      | 0.1  | 0.6  | 0.1  |
| 3250–3500 | 0.0    | 0.0  | 0.0  | 0.0  | 0.0       | 0.0  | 0.2  | 0.1  | 0.2       | 0.1  | 0.3  | 0.2  | 0.2      | 0.1  | 0.3  | 0.0  |
| 3500–3749 | 0.0    | 0.0  | 0.0  | 0.0  | 0.0       | 0.0  | 0.2  | 0.1  | 0.2       | 0.0  | 0.3  | 0.2  | 0.1      | 0.0  | 0.2  | 0.0  |
| 3750–4000 | 0.0    | 0.0  | 0.0  | 0.0  | 0.0       | 0.0  | 0.1  | 0.0  | 0.1       | 0.0  | 0.2  | 0.1  | 0.1      | 0.0  | 0.1  | 0.0  |
| 4000–4250 | 0.0    | 0.0  | 0.0  | 0.0  | 0.0       | 0.0  | 0.1  | 0.0  | 0.0       | 0.0  | 0.2  | 0.1  | 0.1      | 0.0  | 0.0  | 0.0  |
| 4250–4500 | 0.0    | 0.0  | 0.0  | 0.0  | 0.0       | 0.0  | 0.0  | 0.0  | 0.0       | 0.0  | 0.1  | 0.0  | 0.0      | 0.0  | 0.0  | 0.0  |
| 4500–4750 | 0.0    | 0.0  | 0.0  | 0.0  | 0.0       | 0.0  | 0.0  | 0.0  | 0.0       | 0.0  | 0.1  | 0.0  | 0.0      | 0.0  | 0.0  | 0.0  |
| 4750–5000 | 0.0    | 0.0  | 0.0  | 0.0  | 0.0       | 0.0  | 0.0  | 0.0  | 0.0       | 0.0  | 0.0  | 0.0  | 0.0      | 0.0  | 0.0  | 0.0  |
| 5000–5250 | 0.0    | 0.0  | 0.0  | 0.0  | 0.0       | 0.0  | 0.0  | 0.0  | 0.0       | 0.0  | 0.0  | 0.0  | 0.0      | 0.0  | 0.0  | 0.0  |
| 5250–5500 | 0.0    | 0.0  | 0.0  | 0.0  | 0.0       | 0.0  | 0.0  | 0.0  | 0.0       | 0.0  | 0.0  | 0.0  | 0.0      | 0.0  | 0.0  | 0.0  |
| 5500–5750 | 0.0    | 0.0  | 0.0  | 0.0  | 0.0       | 0.0  | 0.0  | 0.0  | 0.0       | 0.0  | 0.0  | 0.0  | 0.0      | 0.0  | 0.0  | 0.0  |
| 5750–6000 | 0.0    | 0.0  | 0.0  | 0.0  | 0.0       | 0.0  | 0.0  | 0.0  | 0.0       | 0.0  | 0.0  | 0.0  | 0.0      | 0.0  | 0.0  | 0.0  |
| Europe    |        |      |      |      |           |      |      |      |           |      |      |      |          |      |      |      |
| 0–250     | 12.9   | 25.1 | 20.6 | 21.9 | 11.0      | 11.6 | 40.5 | 38.5 | 40.3      | 24.9 | 8.3  | 9.3  | 40.3     | 24.9 | 20.6 | 36.2 |
| 250–500   | 15.8   | 22.0 | 18.0 | 18.0 | 12.9      | 12.6 | 34.0 | 35.1 | 27.9      | 23.0 | 12.8 | 12.7 | 27.9     | 23.0 | 21.3 | 25.6 |
| 500–750   | 16.6   | 15.2 | 12.7 | 12.8 | 20.4      | 18.5 | 25.5 | 26.4 | 15.8      | 13.7 | 17.7 | 17.3 | 15.8     | 13.7 | 16.4 | 20.3 |
| 750–1000  | 12.9   | 7.5  | 13.2 | 13.5 | 18.2      | 16.9 | 0.0  | 0.0  | 6.7       | 6.4  | 14.9 | 14.7 | 6.7      | 6.4  | 12.7 | 9.8  |
| 1000–1250 | 13.0   | 3.0  | 10.4 | 11.3 | 13.6      | 14.4 | 0.0  | 0.0  | 5.2       | 5.9  | 16.2 | 16.1 | 5.2      | 5.9  | 8.7  | 3.2  |
| 1250–1500 | 10.2   | 4.2  | 12.1 | 10.2 | 8.9       | 9.5  | 0.0  | 0.0  | 1.8       | 4.3  | 12.0 | 11.9 | 1.8      | 4.3  | 6.4  | 2.5  |
| 1500–1750 | 8.5    | 3.2  | 7.1  | 6.6  | 5.5       | 5.8  | 0.0  | 0.0  | 1.1       | 5.5  | 7.7  | 7.6  | 1.1      | 5.5  | 5.5  | 0.7  |
| 1750–2000 | 3.7    | 3.8  | 3.0  | 2.8  | 3.1       | 3.2  | 0.0  | 0.0  | 0.5       | 3.6  | 4.0  | 4.0  | 0.5      | 3.6  | 3.2  | 0.4  |
| 2000–2050 | 2.8    | 2.6  | 0.7  | 0.9  | 2.8       | 3.0  | 0.0  | 0.0  | 0.3       | 3.4  | 3.3  | 3.3  | 0.3      | 3.4  | 2.2  | 0.4  |
| 2250–2500 | 1.1    | 4.6  | 1.0  | 1.0  | 1.3       | 1.9  | 0.0  | 0.0  | 0.2       | 4.1  | 1.9  | 1.9  | 0.2      | 4.1  | 1.4  | 0.4  |
| 2500–2750 | 1.0    | 4.4  | 0.5  | 0.4  | 0.6       | 0.7  | 0.0  | 0.0  | 0.1       | 1.5  | 0.6  | 0.6  | 0.1      | 1.5  | 0.7  | 0.2  |
| 2750–3000 | 0.8    | 1.6  | 0.3  | 0.3  | 0.4       | 0.4  | 0.0  | 0.0  | 0.1       | 1.5  | 0.3  | 0.3  | 0.1      | 1.3  | 0.4  | 0.2  |
| 3000–3250 | 0.4    | 1.0  | 0.2  | 0.1  | 0.3       | 0.4  | 0.0  | 0.0  | 0.0       | 1.0  | 0.2  | 0.2  | 0.0      | 1.0  | 0.3  | 0.1  |
| 3250–3500 | 0.2    | 0.6  | 0.2  | 0.1  | 0.3       | 0.2  | 0.0  | 0.0  | 0.0       | 0.8  | 0.1  | 0.1  | 0.0      | 1.0  | 0.2  | 0.0  |
| 3500–3749 | 0.1    | 0.4  | 0.0  | 0.1  | 0.2       | 0.1  | 0.0  | 0.0  | 0.0       | 0.1  | 0.0  | 0.0  | 0.0      | 0.1  | 0.0  | 0.0  |
| 3750–4000 | 0.0    | 0.6  | 0.0  | 0.0  | 0.2       | 0.2  | 0.0  | 0.0  | 0.0       | 0.1  | 0.0  | 0.0  | 0.0      | 0.1  | 0.0  | 0.0  |
| 4000–4250 | 0.0    | 0.2  | 0.0  | 0.0  | 0.1       | 0.1  | 0.0  | 0.0  | 0.0       | 0.1  | 0.0  | 0.0  | 0.0      | 0.1  | 0.0  | 0.0  |
| 4250–4500 | 0.0    | 0.0  | 0.0  | 0.0  | 0.1       | 0.1  | 0.0  | 0.0  | 0.0       | 0.1  | 0.0  | 0.0  | 0.0      | 0.1  | 0.0  | 0.0  |
| 4500–4750 | 0.0    | 0.0  | 0.0  | 0.0  | 0.1       | 0.1  | 0.0  | 0.0  | 0.0       | 0.0  | 0.0  | 0.0  | 0.0      | 0.0  | 0.0  | 0.0  |
| 4750–5000 | 0.0    | 0.0  | 0.0  | 0.0  | 0.0       | 0.1  | 0.0  | 0.0  | 0.0       | 0.0  | 0.0  | 0.0  | 0.0      | 0.0  | 0.0  | 0.0  |
| 5000–5250 | 0.0    | 0.0  | 0.0  | 0.0  | 0.0       | 0.1  | 0.0  | 0.0  | 0.0       | 0.0  | 0.0  | 0.0  | 0.0      | 0.0  | 0.0  | 0.0  |
| 5250–5500 | 0.0    | 0.0  | 0.0  | 0.0  | 0.0       | 0.1  | 0.0  | 0.0  | 0.0       | 0.0  | 0.0  | 0.0  | 0.0      | 0.0  | 0.0  | 0.0  |
| 5500–5750 | 0.0    | 0.0  | 0.0  | 0.0  | 0.0       | 0.0  | 0.0  | 0.0  | 0.0       | 0.0  | 0.0  | 0.0  | 0.0      | 0.0  | 0.0  | 0.0  |
| 5750–6000 | 0.0    | 0.0  | 0.0  | 0.0  | 0.0       | 0.0  | 0.0  | 0.0  | 0.0       | 0.0  | 0.0  | 0.0  | 0.0      | 0.0  | 0.0  | 0.0  |

**Table S5c.** Same as Table S5a, for Boreal Eurasia and South Asia.

|                | Forest |      |      |      | Shrubland |      |      |      | Grassland |      |      |      | Cropland |      |      |      |
|----------------|--------|------|------|------|-----------|------|------|------|-----------|------|------|------|----------|------|------|------|
|                | MAM    | JJA  | SON  | DJF  | MAM       | JJA  | SON  | DJF  | MAM       | JJA  | SON  | DJF  | MAM      | JJA  | SON  | DJF  |
| Boreal Eurasia |        |      |      |      |           |      |      |      |           |      |      |      |          |      |      |      |
| 0–250          | 6.3    | 7.0  | 42.5 | 45.0 | 6.2       | 8.6  | 22.2 | 20.6 | 5.9       | 8.4  | 41.6 | 30.0 | 5.9      | 8.4  | 30.6 | 22.7 |
| 250–500        | 12.1   | 15.8 | 32.9 | 31.4 | 8.8       | 13.7 | 44.5 | 45.3 | 9.5       | 17.0 | 33.4 | 40.0 | 9.5      | 17.0 | 29.8 | 33.3 |
| 500–750        | 15.6   | 22.8 | 24.6 | 23.6 | 11.7      | 15.7 | 23.4 | 23.9 | 13.6      | 19.0 | 25.0 | 30.0 | 13.6     | 19.0 | 20.4 | 22.8 |
| 750–1000       | 18.2   | 19.6 | 0.0  | 0.0  | 19.1      | 15.5 | 4.7  | 5.0  | 17.8      | 20.0 | 0.0  | 0.0  | 17.8     | 20.0 | 9.7  | 10.8 |
| 1000–1250      | 15.6   | 13.3 | 0.0  | 0.0  | 17.2      | 13.8 | 2.1  | 2.1  | 15.5      | 15.6 | 0.0  | 0.0  | 15.5     | 15.6 | 4.9  | 5.5  |
| 1250–1500      | 11.8   | 8.8  | 0.0  | 0.0  | 11.2      | 10.9 | 1.8  | 1.8  | 12.4      | 8.3  | 0.0  | 0.0  | 12.4     | 8.3  | 2.0  | 2.2  |
| 1500–1750      | 7.9    | 5.5  | 0.0  | 0.0  | 7.7       | 8.2  | 0.7  | 0.8  | 9.7       | 4.9  | 0.0  | 0.0  | 9.7      | 4.9  | 1.4  | 1.5  |
| 1750–2000      | 4.7    | 3.3  | 0.0  | 0.0  | 5.2       | 5.5  | 0.2  | 0.2  | 5.8       | 2.9  | 0.0  | 0.0  | 5.8      | 2.9  | 0.6  | 0.6  |
| 2000–2050      | 2.7    | 1.8  | 0.0  | 0.0  | 3.2       | 3.5  | 0.2  | 0.2  | 3.4       | 1.8  | 0.0  | 0.0  | 3.4      | 1.8  | 0.4  | 0.5  |
| 2250–2500      | 1.9    | 1.1  | 0.0  | 0.0  | 3.5       | 2.0  | 0.1  | 0.1  | 2.5       | 0.8  | 0.0  | 0.0  | 2.5      | 0.8  | 0.1  | 0.1  |
| 2500–2750      | 1.2    | 0.5  | 0.0  | 0.0  | 2.6       | 1.2  | 0.1  | 0.0  | 1.4       | 0.5  | 0.0  | 0.0  | 1.4      | 0.5  | 0.1  | 0.0  |
| 2750–3000      | 0.8    | 0.3  | 0.0  | 0.0  | 1.8       | 0.7  | 0.0  | 0.0  | 1.1       | 0.3  | 0.0  | 0.0  | 1.1      | 0.3  | 0.0  | 0.0  |
| 3000–3250      | 0.6    | 0.1  | 0.0  | 0.0  | 1.1       | 0.4  | 0.0  | 0.0  | 0.5       | 0.2  | 0.0  | 0.0  | 0.5      | 0.2  | 0.0  | 0.0  |
| 3250–3500      | 0.3    | 0.1  | 0.0  | 0.0  | 0.6       | 0.2  | 0.0  | 0.0  | 0.4       | 0.1  | 0.0  | 0.0  | 0.4      | 0.1  | 0.0  | 0.0  |
| 3500–3749      | 0.1    | 0.0  | 0.0  | 0.0  | 0.1       | 0.1  | 0.0  | 0.0  | 0.2       | 0.1  | 0.0  | 0.0  | 0.2      | 0.1  | 0.0  | 0.0  |
| 3750–4000      | 0.1    | 0.0  | 0.0  | 0.0  | 0.0       | 0.0  | 0.0  | 0.0  | 0.2       | 0.1  | 0.0  | 0.0  | 0.2      | 0.1  | 0.0  | 0.0  |
| 4000–4250      | 0.1    | 0.0  | 0.0  | 0.0  | 0.0       | 0.0  | 0.0  | 0.0  | 0.1       | 0.0  | 0.0  | 0.0  | 0.1      | 0.0  | 0.0  | 0.0  |
| 4250–4500      | 0.0    | 0.0  | 0.0  | 0.0  | 0.0       | 0.0  | 0.0  | 0.0  | 0.0       | 0.0  | 0.0  | 0.0  | 0.0      | 0.0  | 0.0  | 0.0  |
| 4500–4750      | 0.0    | 0.0  | 0.0  | 0.0  | 0.0       | 0.0  | 0.0  | 0.0  | 0.0       | 0.0  | 0.0  | 0.0  | 0.0      | 0.0  | 0.0  | 0.0  |
| 4750–5000      | 0.0    | 0.0  | 0.0  | 0.0  | 0.0       | 0.0  | 0.0  | 0.0  | 0.0       | 0.0  | 0.0  | 0.0  | 0.0      | 0.0  | 0.0  | 0.0  |
| 5000–5250      | 0.0    | 0.0  | 0.0  | 0.0  | 0.0       | 0.0  | 0.0  | 0.0  | 0.0       | 0.0  | 0.0  | 0.0  | 0.0      | 0.0  | 0.0  | 0.0  |
| 5250–5500      | 0.0    | 0.0  | 0.0  | 0.0  | 0.0       | 0.0  | 0.0  | 0.0  | 0.0       | 0.0  | 0.0  | 0.0  | 0.0      | 0.0  | 0.0  | 0.0  |
| 5500–5750      | 0.0    | 0.0  | 0.0  | 0.0  | 0.0       | 0.0  | 0.0  | 0.0  | 0.0       | 0.0  | 0.0  | 0.0  | 0.0      | 0.0  | 0.0  | 0.0  |
| 5750–6000      | 0.0    | 0.0  | 0.0  | 0.0  | 0.0       | 0.0  | 0.0  | 0.0  | 0.0       | 0.0  | 0.0  | 0.0  | 0.0      | 0.0  | 0.0  | 0.0  |
| South Asia     |        |      |      |      |           |      |      |      |           |      |      |      |          |      |      |      |
| 0–250          | 16.1   | 5.1  | 18.7 | 28.8 | 15.6      | 10.9 | 19.3 | 17.4 | 6.6       | 4.8  | 11.8 | 7.9  | 6.6      | 4.8  | 20.8 | 23.1 |
| 250–500        | 17.7   | 9.3  | 21.8 | 25.7 | 17.5      | 13.9 | 24.8 | 23.9 | 10.4      | 10.1 | 20.5 | 38.5 | 10.4     | 10.1 | 32.0 | 29.6 |
| 500–750        | 16.7   | 17.2 | 18.3 | 20.4 | 16.0      | 15.8 | 19.7 | 25.0 | 13.1      | 10.5 | 18.4 | 20.1 | 13.1     | 10.5 | 22.8 | 19.1 |
| 750–1000       | 15.4   | 18.0 | 17.1 | 11.6 | 13.6      | 13.0 | 12.7 | 17.2 | 14.5      | 11.1 | 15.5 | 15.7 | 14.5     | 11.1 | 13.3 | 11.6 |
| 1000–1250      | 11.9   | 15.3 | 10.7 | 6.4  | 11.4      | 8.4  | 7.0  | 7.4  | 15.1      | 11.6 | 12.0 | 8.2  | 15.1     | 11.6 | 5.6  | 6.1  |
| 1250–1500      | 8.7    | 13.5 | 5.9  | 3.3  | 8.2       | 5.5  | 6.6  | 4.7  | 13.0      | 11.9 | 7.5  | 4.2  | 13.0     | 11.9 | 2.8  | 3.9  |
| 1500–1750      | 5.8    | 10.2 | 3.6  | 1.8  | 5.5       | 5.6  | 4.9  | 2.0  | 9.7       | 11.4 | 5.9  | 2.5  | 9.7      | 11.4 | 1.5  | 2.4  |
| 1750–2000      | 3.4    | 6.3  | 2.6  | 0.9  | 4.0       | 5.9  | 2.1  | 0.9  | 6.7       | 9.9  | 3.6  | 0.6  | 6.7      | 9.9  | 0.5  | 1.8  |
| 2000–2050      | 1.9    | 2.7  | 0.5  | 0.4  | 2.7       | 4.9  | 1.1  | 0.5  | 4.1       | 6.6  | 1.9  | 1.3  | 4.1      | 6.6  | 0.4  | 1.2  |
| 2250–2500      | 1.1    | 1.3  | 0.3  | 0.2  | 2.1       | 2.8  | 0.8  | 0.3  | 2.4       | 4.7  | 1.1  | 0.4  | 2.4      | 4.7  | 0.1  | 0.5  |
| 2500–2750      | 0.6    | 0.6  | 0.2  | 0.1  | 1.5       | 2.4  | 0.1  | 0.2  | 1.5       | 2.6  | 0.6  | 0.2  | 1.5      | 2.6  | 0.1  | 0.3  |
| 2750–3000      | 0.3    | 0.3  | 0.1  | 0.1  | 0.8       | 2.4  | 0.2  | 0.1  | 0.9       | 1.6  | 0.4  | 0.2  | 0.9      | 1.6  | 0.1  | 0.1  |
| 3000–3250      | 0.2    | 0.1  | 0.1  | 0.1  | 0.4       | 2.3  | 0.1  | 0.1  | 0.6       | 1.0  | 0.3  | 0.2  | 0.6      | 1.0  | 0.0  | 0.2  |
| 3250–3500      | 0.1    | 0.1  | 0.1  | 0.1  | 0.3       | 2.2  | 0.0  | 0.1  | 0.5       | 0.6  | 0.1  | 0.0  | 0.5      | 0.6  | 0.0  | 0.1  |
| 3500–3749      | 0.1    | 0.0  | 0.0  | 0.1  | 0.2       | 1.8  | 0.2  | 0.1  | 0.3       | 0.3  | 0.1  | 0.0  | 0.3      | 0.3  | 0.0  | 0.0  |
| 3750–4000      | 0.0    | 0.0  | 0.0  | 0.0  | 0.1       | 1.1  | 0.1  | 0.1  | 0.2       | 0.3  | 0.1  | 0.0  | 0.2      | 0.3  | 0.0  | 0.0  |
| 4000–4250      | 0.0    | 0.0  | 0.0  | 0.0  | 0.1       | 0.5  | 0.1  | 0.0  | 0.2       | 0.3  | 0.1  | 0.0  | 0.2      | 0.3  | 0.0  | 0.0  |
| 4250–4500      | 0.0    | 0.0  | 0.0  | 0.0  | 0.0       | 0.4  | 0.1  | 0.0  | 0.1       | 0.3  | 0.1  | 0.0  | 0.1      | 0.3  | 0.0  | 0.0  |
| 4500–4750      | 0.0    | 0.0  | 0.0  | 0.0  | 0.0       | 0.1  | 0.1  | 0.0  | 0.1       | 0.1  | 0.0  | 0.0  | 0.1      | 0.1  | 0.0  | 0.0  |
| 4750–5000      | 0.0    | 0.0  | 0.0  | 0.0  | 0.0       | 0.1  | 0.0  | 0.0  | 0.0       | 0.1  | 0.0  | 0.0  | 0.0      | 0.1  | 0.0  | 0.0  |
| 5000–5250      | 0.0    | 0.0  | 0.0  | 0.0  | 0.0       | 0.0  | 0.0  | 0.0  | 0.0       | 0.1  | 0.0  | 0.0  | 0.0      | 0.1  | 0.0  | 0.0  |
| 5250–5500      | 0.0    | 0.0  | 0.0  | 0.0  | 0.0       | 0.0  | 0.0  | 0.0  | 0.0       | 0.1  | 0.0  | 0.0  | 0.0      | 0.1  | 0.0  | 0.0  |
| 5500–5750      | 0.0    | 0.0  | 0.0  | 0.0  | 0.0       | 0.0  | 0.0  | 0.0  | 0.0       | 0.0  | 0.0  | 0.0  | 0.0      | 0.0  | 0.0  | 0.0  |
| 5750–6000      | 0.0    | 0.0  | 0.0  | 0.0  | 0.0       | 0.0  | 0.0  | 0.0  | 0.0       | 0.0  | 0.0  | 0.0  | 0.0      | 0.0  | 0.0  | 0.0  |

**Table S5d.** Same as Table S5a for Australia.

|           | Forest |      |      |      | MAM  | Shrubland |      |      |      | MAM  | Grassland |      |      |      | MAM  | Cropland |  |  |  |
|-----------|--------|------|------|------|------|-----------|------|------|------|------|-----------|------|------|------|------|----------|--|--|--|
|           | MAM    | JJA  | SON  | DJF  |      | JJA       | SON  | DJF  | JJA  |      | SON       | DJF  | JJA  | SON  |      | DJF      |  |  |  |
| Australia |        |      |      |      |      |           |      |      |      |      |           |      |      |      |      |          |  |  |  |
| 0–250     | 11.9   | 13.6 | 20.6 | 15.5 | 15.0 | 15.9      | 12.4 | 6.1  | 25.7 | 18.4 | 7.6       | 15.7 | 25.7 | 18.4 | 43.9 | 43.3     |  |  |  |
| 250–500   | 17.2   | 16.9 | 21.6 | 26.4 | 27.5 | 28.6      | 18.5 | 9.7  | 24.6 | 28.9 | 14.4      | 18.9 | 24.6 | 28.9 | 32.1 | 32.4     |  |  |  |
| 500–750   | 16.5   | 16.8 | 21.8 | 34.8 | 20.6 | 26.3      | 18.2 | 9.5  | 18.7 | 22.7 | 15.6      | 15.7 | 18.7 | 22.7 | 24.0 | 24.3     |  |  |  |
| 750–1000  | 17.4   | 17.6 | 13.5 | 9.6  | 12.7 | 15.8      | 15.7 | 10.6 | 12.7 | 13.8 | 17.1      | 12.0 | 12.7 | 13.8 | 0.0  | 0.0      |  |  |  |
| 1000–1250 | 13.0   | 12.4 | 9.3  | 6.3  | 7.5  | 6.9       | 11.3 | 11.1 | 7.6  | 8.5  | 16.7      | 8.5  | 7.6  | 8.5  | 0.0  | 0.0      |  |  |  |
| 1250–1500 | 7.3    | 6.9  | 7.0  | 4.1  | 5.2  | 3.1       | 6.9  | 11.6 | 4.4  | 4.1  | 11.3      | 8.0  | 4.4  | 4.1  | 0.0  | 0.0      |  |  |  |
| 1500–1750 | 3.0    | 2.8  | 3.1  | 1.8  | 3.6  | 1.5       | 4.6  | 10.4 | 2.4  | 1.7  | 7.2       | 6.5  | 2.4  | 1.7  | 0.0  | 0.0      |  |  |  |
| 1750–2000 | 1.6    | 1.5  | 1.6  | 0.8  | 2.4  | 0.8       | 3.2  | 9.3  | 1.6  | 0.8  | 4.3       | 5.5  | 1.6  | 0.8  | 0.0  | 0.0      |  |  |  |
| 2000–2050 | 2.8    | 2.5  | 0.7  | 0.4  | 1.9  | 0.5       | 2.5  | 6.3  | 0.9  | 0.4  | 2.5       | 3.4  | 0.9  | 0.4  | 0.0  | 0.0      |  |  |  |
| 2250–2500 | 1.5    | 1.4  | 0.5  | 0.3  | 1.0  | 0.3       | 1.7  | 5.1  | 0.5  | 0.3  | 1.5       | 2.8  | 0.5  | 0.3  | 0.0  | 0.0      |  |  |  |
| 2500–2750 | 1.6    | 1.5  | 0.1  | 0.0  | 0.7  | 0.2       | 1.2  | 3.4  | 0.4  | 0.2  | 0.8       | 2.2  | 0.4  | 0.2  | 0.0  | 0.0      |  |  |  |
| 2750–3000 | 2.3    | 2.1  | 0.1  | 0.0  | 0.5  | 0.1       | 0.9  | 2.6  | 0.2  | 0.1  | 0.5       | 0.6  | 0.3  | 0.1  | 0.0  | 0.0      |  |  |  |
| 3000–3250 | 1.6    | 1.5  | 0.1  | 0.0  | 0.4  | 0.0       | 1.2  | 1.5  | 0.1  | 0.1  | 0.3       | 0.1  | 0.1  | 0.1  | 0.0  | 0.0      |  |  |  |
| 3250–3500 | 1.0    | 1.0  | 0.0  | 0.0  | 0.3  | 0.0       | 0.6  | 1.1  | 0.1  | 0.0  | 0.2       | 0.1  | 0.1  | 0.0  | 0.0  | 0.0      |  |  |  |
| 3500–3749 | 0.6    | 0.6  | 0.0  | 0.0  | 0.1  | 0.0       | 0.4  | 0.7  | 0.0  | 0.0  | 0.0       | 0.0  | 0.0  | 0.0  | 0.0  | 0.0      |  |  |  |
| 3750–4000 | 0.4    | 0.6  | 0.0  | 0.0  | 0.1  | 0.0       | 0.3  | 0.5  | 0.0  | 0.0  | 0.0       | 0.0  | 0.0  | 0.0  | 0.0  | 0.0      |  |  |  |
| 4000–4250 | 0.2    | 0.2  | 0.0  | 0.0  | 0.1  | 0.0       | 0.2  | 0.3  | 0.0  | 0.0  | 0.0       | 0.0  | 0.0  | 0.0  | 0.0  | 0.0      |  |  |  |
| 4250–4500 | 0.1    | 0.1  | 0.0  | 0.0  | 0.1  | 0.0       | 0.1  | 0.2  | 0.0  | 0.0  | 0.0       | 0.0  | 0.0  | 0.0  | 0.0  | 0.0      |  |  |  |
| 4500–4750 | 0.0    | 0.0  | 0.0  | 0.0  | 0.1  | 0.0       | 0.1  | 0.0  | 0.0  | 0.0  | 0.0       | 0.0  | 0.0  | 0.0  | 0.0  | 0.0      |  |  |  |
| 4750–5000 | 0.0    | 0.0  | 0.0  | 0.0  | 0.1  | 0.0       | 0.0  | 0.0  | 0.0  | 0.0  | 0.0       | 0.0  | 0.0  | 0.0  | 0.0  | 0.0      |  |  |  |
| 5000–5250 | 0.0    | 0.0  | 0.0  | 0.0  | 0.1  | 0.0       | 0.0  | 0.0  | 0.0  | 0.0  | 0.0       | 0.0  | 0.0  | 0.0  | 0.0  | 0.0      |  |  |  |
| 5250–5500 | 0.0    | 0.0  | 0.0  | 0.0  | 0.0  | 0.0       | 0.0  | 0.0  | 0.0  | 0.0  | 0.0       | 0.0  | 0.0  | 0.0  | 0.0  | 0.0      |  |  |  |
| 5500–5750 | 0.0    | 0.0  | 0.0  | 0.0  | 0.0  | 0.0       | 0.0  | 0.0  | 0.0  | 0.0  | 0.0       | 0.0  | 0.0  | 0.0  | 0.0  | 0.0      |  |  |  |
| 5750–6000 | 0.0    | 0.0  | 0.0  | 0.0  | 0.0  | 0.0       | 0.0  | 0.0  | 0.0  | 0.0  | 0.0       | 0.0  | 0.0  | 0.0  | 0.0  | 0.0      |  |  |  |

**Table S6.** AOD- and pixel-weighted percentages of fire smoke injection heights per biome.

|           | EvgrNdl | EvgrBrl | Forest<br>DecNdl | Dec Brl | Mixed | Closed         | Shrubland<br>Open | Woody Sav | Savanna | Grassland<br>Grass | Wetland | Cropland |
|-----------|---------|---------|------------------|---------|-------|----------------|-------------------|-----------|---------|--------------------|---------|----------|
|           |         |         |                  |         |       | AOD-Weighted   |                   |           |         |                    |         |          |
| 0–250     | 5.0     | 12.5    | 5.4              | 14.8    | 8.4   | 5.4            | 7.0               | 9.2       | 8.0     | 11.2               | 11.5    | 7.0      |
| 250–500   | 7.8     | 25.1    | 15.7             | 25.0    | 16.2  | 15.3           | 14.2              | 20.5      | 18.8    | 18.5               | 30.0    | 19.8     |
| 500–750   | 9.0     | 21.0    | 22.8             | 19.3    | 17.8  | 19.2           | 15.1              | 20.7      | 18.8    | 16.5               | 22.5    | 19.5     |
| 750–1000  | 9.4     | 16.1    | 19.3             | 14.2    | 17.1  | 26.4           | 14.1              | 17.2      | 16.5    | 13.5               | 16.0    | 16.5     |
| 1000–1250 | 10.1    | 10.7    | 13.2             | 9.3     | 12.5  | 10.6           | 13.5              | 12.7      | 12.6    | 11.5               | 8.8     | 13.0     |
| 1250–1500 | 8.1     | 6.6     | 8.7              | 5.7     | 9.6   | 13.3           | 11.5              | 7.8       | 8.7     | 8.7                | 4.7     | 9.8      |
| 1500–1750 | 6.6     | 3.8     | 6.0              | 3.4     | 6.5   | 5.5            | 9.1               | 4.4       | 5.7     | 6.9                | 2.7     | 6.3      |
| 1750–2000 | 5.6     | 1.8     | 3.9              | 2.3     | 3.8   | 2.0            | 6.1               | 2.6       | 3.6     | 5.1                | 1.5     | 3.4      |
| 2000–2050 | 4.7     | 1.0     | 2.3              | 1.5     | 2.2   | 1.4            | 3.7               | 1.8       | 2.2     | 3.1                | 0.9     | 1.9      |
| 2250–2500 | 4.0     | 0.6     | 1.4              | 1.0     | 1.4   | 0.5            | 2.3               | 1.2       | 1.5     | 2.0                | 0.6     | 1.1      |
| 2500–2750 | 3.1     | 0.3     | 0.6              | 0.9     | 1.1   | 0.0            | 1.4               | 0.7       | 0.9     | 1.1                | 0.4     | 0.7      |
| 2750–3000 | 2.3     | 0.2     | 0.3              | 0.7     | 0.8   | 0.2            | 0.9               | 0.3       | 0.7     | 0.7                | 0.1     | 0.4      |
| 3000–3250 | 2.0     | 0.1     | 0.2              | 0.6     | 0.7   | 0.2            | 0.5               | 0.2       | 0.5     | 0.4                | 0.0     | 0.3      |
| 3250–3500 | 1.9     | 0.1     | 0.1              | 0.3     | 0.5   | 0.0            | 0.3               | 0.2       | 0.4     | 0.3                | 0.1     | 0.2      |
| 3500–3749 | 2.3     | 0.1     | 0.1              | 0.3     | 0.3   | 0.0            | 0.1               | 0.1       | 0.3     | 0.2                | 0.1     | 0.1      |
| 3750–4000 | 2.6     | 0.0     | 0.0              | 0.2     | 0.2   | 0.0            | 0.1               | 0.1       | 0.3     | 0.1                | 0.0     | 0.0      |
| 4000–4250 | 3.1     | 0.0     | 0.0              | 0.2     | 0.2   | 0.0            | 0.1               | 0.1       | 0.3     | 0.1                | 0.1     | 0.0      |
| 4250–4500 | 3.4     | 0.0     | 0.0              | 0.1     | 0.2   | 0.0            | 0.0               | 0.1       | 0.1     | 0.1                | 0.0     | 0.0      |
| 4500–4750 | 3.0     | 0.0     | 0.0              | 0.1     | 0.1   | 0.0            | 0.0               | 0.1       | 0.1     | 0.0                | 0.0     | 0.0      |
| 4750–5000 | 2.5     | 0.0     | 0.0              | 0.1     | 0.1   | 0.0            | 0.0               | 0.0       | 0.0     | 0.0                | 0.0     | 0.0      |
| 5000–5250 | 1.5     | 0.0     | 0.0              | 0.0     | 0.1   | 0.0            | 0.0               | 0.0       | 0.0     | 0.0                | 0.0     | 0.0      |
| 5250–5500 | 1.0     | 0.0     | 0.0              | 0.0     | 0.1   | 0.0            | 0.0               | 0.0       | 0.0     | 0.0                | 0.0     | 0.0      |
| 5500–5750 | 0.6     | 0.0     | 0.0              | 0.0     | 0.1   | 0.0            | 0.0               | 0.0       | 0.0     | 0.0                | 0.0     | 0.0      |
| 5750–6000 | 0.4     | 0.0     | 0.0              | 0.0     | 0.0   | 0.0            | 0.0               | 0.0       | 0.0     | 0.0                | 0.0     | 0.0      |
|           |         |         |                  |         |       | Pixel-Weighted |                   |           |         |                    |         |          |
| 0–250     | 7.1     | 13.6    | 5.2              | 14.8    | 9.6   | 7.4            | 8.2               | 10.0      | 9.6     | 10.8               | 13.3    | 7.8      |
| 250–500   | 10.9    | 26.6    | 14.7             | 25.6    | 17.7  | 20.1           | 17.1              | 22.1      | 20.5    | 19.3               | 31.4    | 20.7     |
| 500–750   | 11.9    | 21.7    | 21.7             | 19.6    | 17.9  | 25.7           | 16.5              | 21.0      | 19.3    | 16.5               | 22.7    | 18.7     |
| 750–1000  | 10.9    | 15.4    | 19.0             | 13.8    | 16.8  | 23.5           | 14.6              | 16.8      | 16.2    | 13.8               | 15.1    | 15.9     |
| 1000–1250 | 9.9     | 9.5     | 13.7             | 8.9     | 12.8  | 10.1           | 12.1              | 11.9      | 12.0    | 11.8               | 7.8     | 12.8     |
| 1250–1500 | 8.0     | 5.8     | 9.6              | 5.8     | 9.5   | 7.3            | 9.6               | 7.3       | 8.1     | 8.8                | 4.2     | 9.8      |
| 1500–1750 | 5.9     | 3.2     | 6.4              | 3.5     | 6.4   | 2.9            | 7.0               | 4.2       | 5.2     | 6.6                | 2.3     | 6.2      |
| 1750–2000 | 4.7     | 1.8     | 4.1              | 2.5     | 3.7   | 1.5            | 5.0               | 2.5       | 3.3     | 4.6                | 1.2     | 3.4      |
| 2000–2050 | 3.7     | 1.0     | 2.4              | 1.6     | 2.0   | 0.7            | 3.3               | 1.6       | 2.0     | 2.9                | 0.8     | 1.9      |
| 2250–2500 | 3.4     | 0.6     | 1.5              | 1.1     | 1.2   | 0.3            | 2.2               | 1.0       | 1.3     | 1.9                | 0.5     | 1.1      |
| 2500–2750 | 3.0     | 0.3     | 0.8              | 0.8     | 0.8   | 0.1            | 1.5               | 0.6       | 0.8     | 1.1                | 0.3     | 0.7      |
| 2750–3000 | 2.5     | 0.2     | 0.5              | 0.5     | 0.5   | 0.3            | 1.0               | 0.3       | 0.6     | 0.7                | 0.1     | 0.4      |
| 3000–3250 | 2.3     | 0.1     | 0.2              | 0.4     | 0.4   | 0.1            | 0.8               | 0.2       | 0.4     | 0.4                | 0.1     | 0.3      |
| 3250–3500 | 2.1     | 0.1     | 0.1              | 0.3     | 0.2   | 0.0            | 0.5               | 0.2       | 0.2     | 0.3                | 0.1     | 0.2      |
| 3500–3749 | 2.0     | 0.1     | 0.1              | 0.2     | 0.2   | 0.0            | 0.2               | 0.1       | 0.2     | 0.2                | 0.1     | 0.1      |
| 3750–4000 | 2.0     | 0.0     | 0.0              | 0.2     | 0.1   | 0.0            | 0.2               | 0.1       | 0.1     | 0.1                | 0.0     | 0.0      |
| 4000–4250 | 2.1     | 0.0     | 0.0              | 0.2     | 0.1   | 0.0            | 0.1               | 0.1       | 0.1     | 0.1                | 0.0     | 0.0      |
| 4250–4500 | 2.3     | 0.0     | 0.0              | 0.1     | 0.1   | 0.0            | 0.1               | 0.0       | 0.1     | 0.1                | 0.0     | 0.0      |
| 4500–4750 | 1.8     | 0.0     | 0.0              | 0.1     | 0.0   | 0.0            | 0.0               | 0.0       | 0.0     | 0.0                | 0.0     | 0.0      |
| 4750–5000 | 1.4     | 0.0     | 0.0              | 0.0     | 0.0   | 0.0            | 0.0               | 0.0       | 0.0     | 0.0                | 0.0     | 0.0      |
| 5000–5250 | 0.8     | 0.0     | 0.0              | 0.0     | 0.0   | 0.0            | 0.0               | 0.0       | 0.0     | 0.0                | 0.0     | 0.0      |
| 5250–5500 | 0.6     | 0.0     | 0.0              | 0.0     | 0.0   | 0.0            | 0.0               | 0.0       | 0.0     | 0.0                | 0.0     | 0.0      |
| 5500–5750 | 0.4     | 0.0     | 0.0              | 0.0     | 0.0   | 0.0            | 0.0               | 0.0       | 0.0     | 0.0                | 0.0     | 0.0      |
| 5750–6000 | 0.3     | 0.0     | 0.0              | 0.0     | 0.0   | 0.0            | 0.0               | 0.0       | 0.0     | 0.0                | 0.0     | 0.0      |

a) Plume O045402-B047-SPWR01

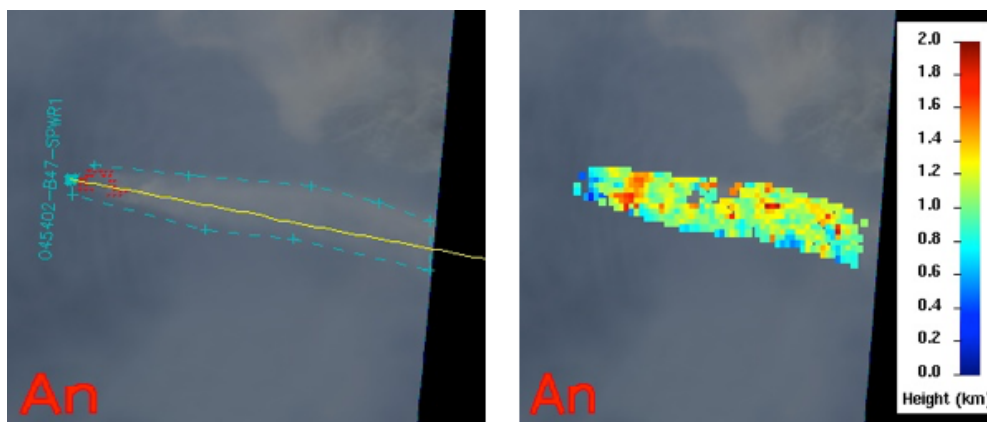

b) Plume O045820-B057-SPWR02

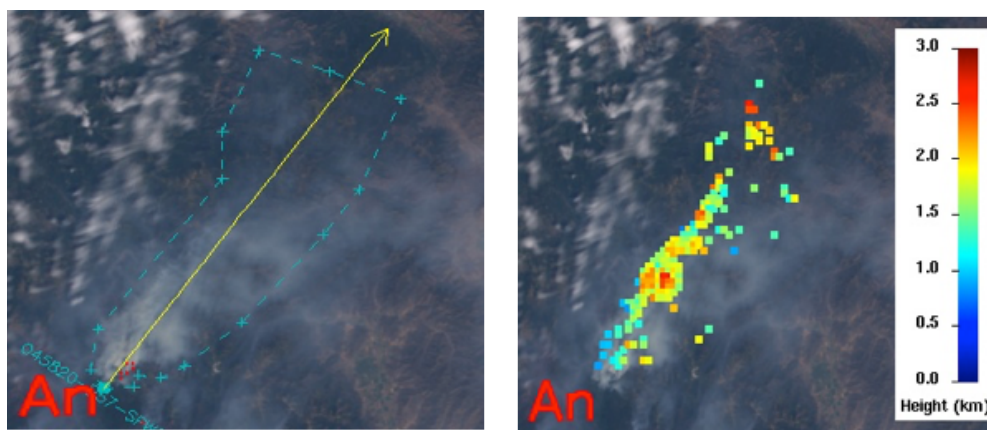

**Figure S1.** Examples of Plume Stereo-height Retrieval Density. a) Plume O045402-B047-SPWR01 with high retrieval density (PctHts-Filled=84%) and high AOD (mean AOD558 = 1.05); b) Plume O045820-B057-SPWR02 with low retrieval density (PctHtsFilled= 40%) and lower AOD (mean AOD558 = 0.2).

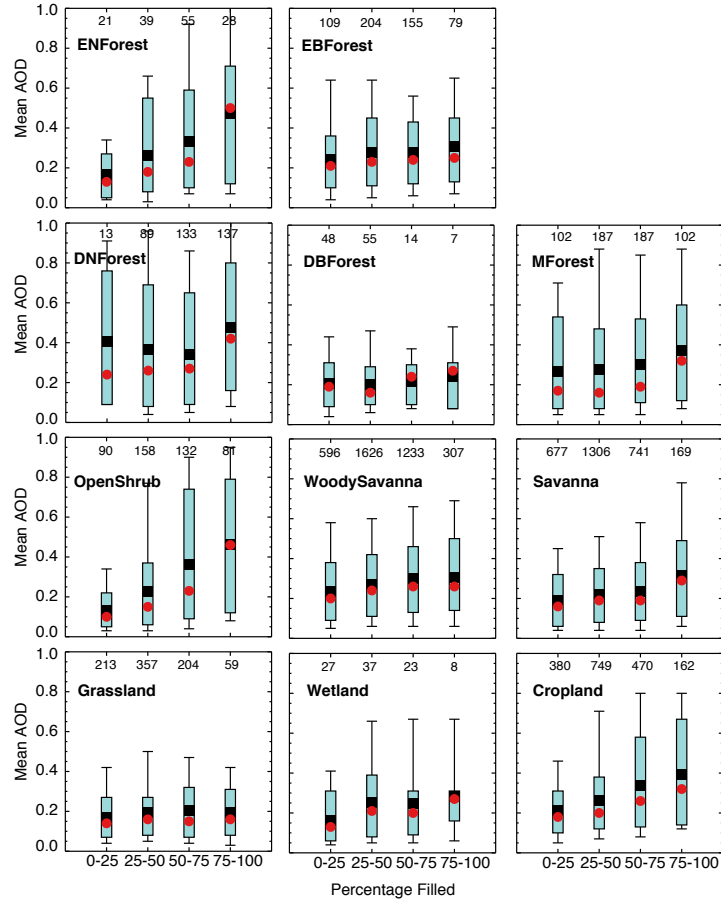

**Figure S2.** Distributions of mean AOD558 with respect to percentage of the DAR filled with successful retrievals (PcntHtsFilled) over 12 biomes for this study. The medians (red circles) and the means (black squares) are shown along with the central 67% (light blue box) and the central 90% (black whiskers). Only biomes with more than 10 plumes are plotted. The number of cases is indicated at the top of each boxplot.

To determine the effect of including the  $\pm 500$  m plume-height measurement uncertainty in the fitting technique, we compare in Figure S3 the histograms of (1) the originally retrieved MISR plume heights for the whole dataset, with those derived by adding statistically generated heights (2) without and (3) with the  $\pm 500$  m measurement uncertainty. To determine the impact of the fitting technique on the results, we also include histograms of the MISR plume heights derived by considering, for each plume, normal distributions having the same mean as the retrieved data and standard deviations equal to (4)  $1xSD$  and (5)  $2xSD$ . This comparison shows that the five distributions are very similar, with medians of 811, 792, 754, 768 and 757 m respectively. Similar results are found with the means of the distributions. The vertical distributions of the stereo-height retrievals with uncertainty added are slightly spread out towards the tails of the original distributions when the stereo-height retrievals within the DAR are included in the analysis. The spread of each plume is increased by including the effect of retrieval variability. Including the 500 m measurement uncertainty to determine the variability of the plume yields similar results as the distribution without including this factor (median of 754 m versus 792 m). Similar results are found if all the plumes are considered having a normal distribution.

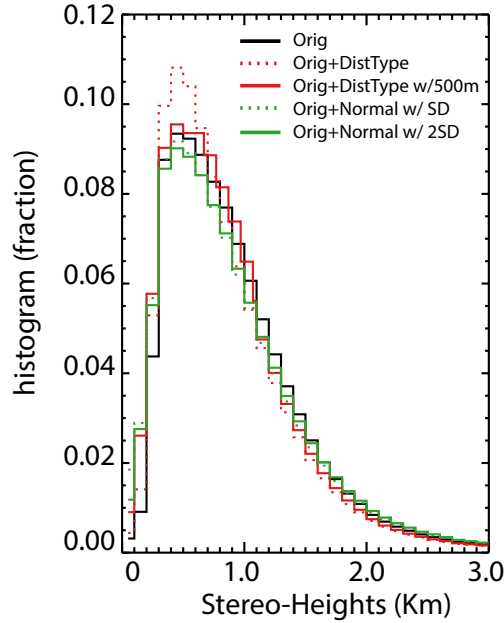

**Figure S3.** Histogram of originally retrieved MISR plume heights (black), originally retrieved and fitted depending on distribution type without  $\pm 500$  m factor (dotted red) and with  $\pm 500$  m factor (solid red), and originally retrieved and fitted to a normal distribution with  $1xSD$  (dotted green) and  $2xSD$  (solid green). Data points having more than 3000 m altitude are not shown to better illustrate the distribution of data values.

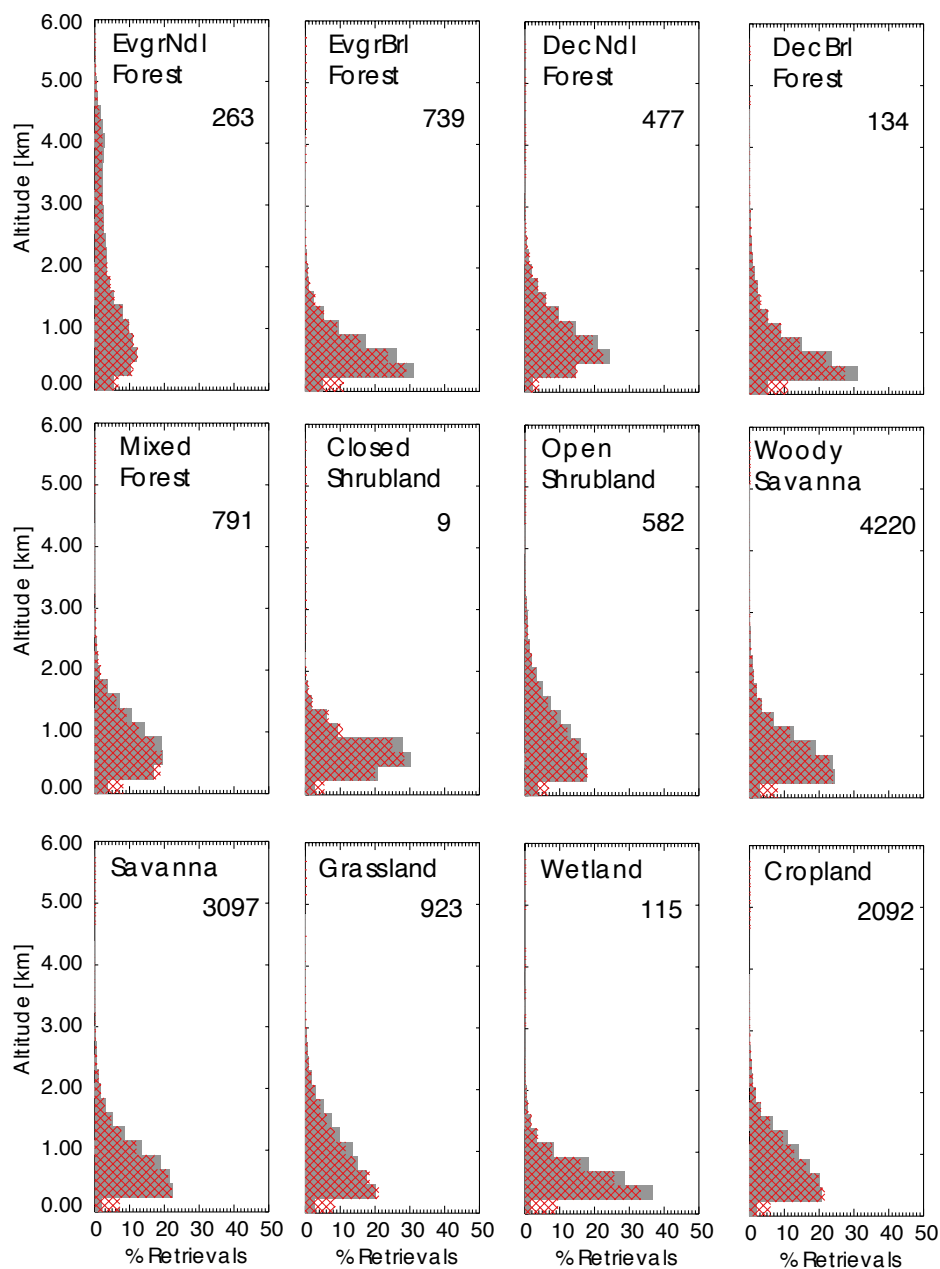

**Figure S4.** Pixel-weighted results. Vertical distribution of number of stereo-height retrievals in 250-meter bins for successful retrievals (gray) and successful + filled retrievals (hatched red), over our 12 biomes. Numeric annotations indicate the number of plumes in each classification.



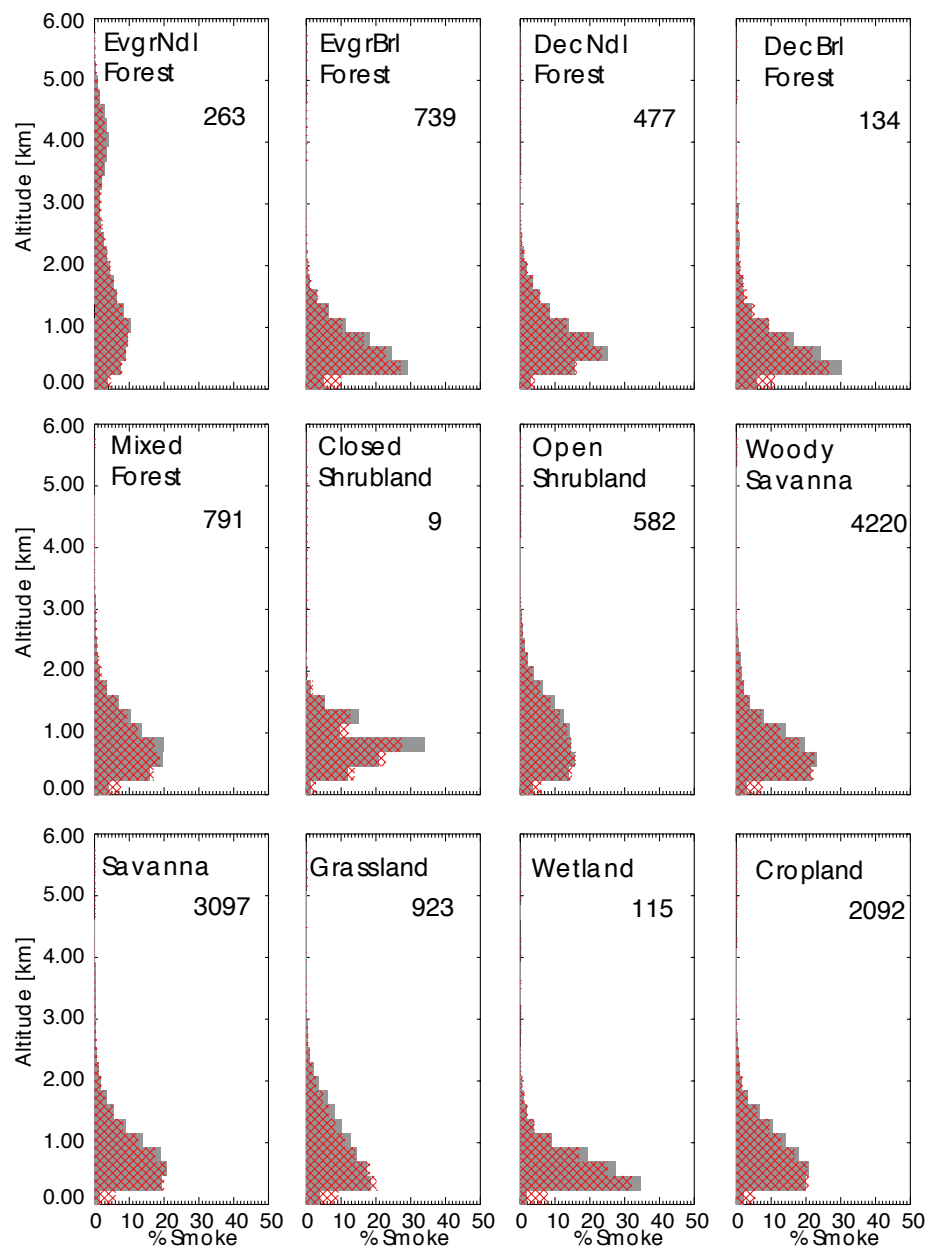

**Figure S5.** AOD-weighted results. Vertical distribution of percentage of smoke in 250-meter bins for original AOD retrievals (gray) and final AOD retrievals (hatched red), over our 12 biomes. Numeric annotations indicate the number of plumes in each classification.

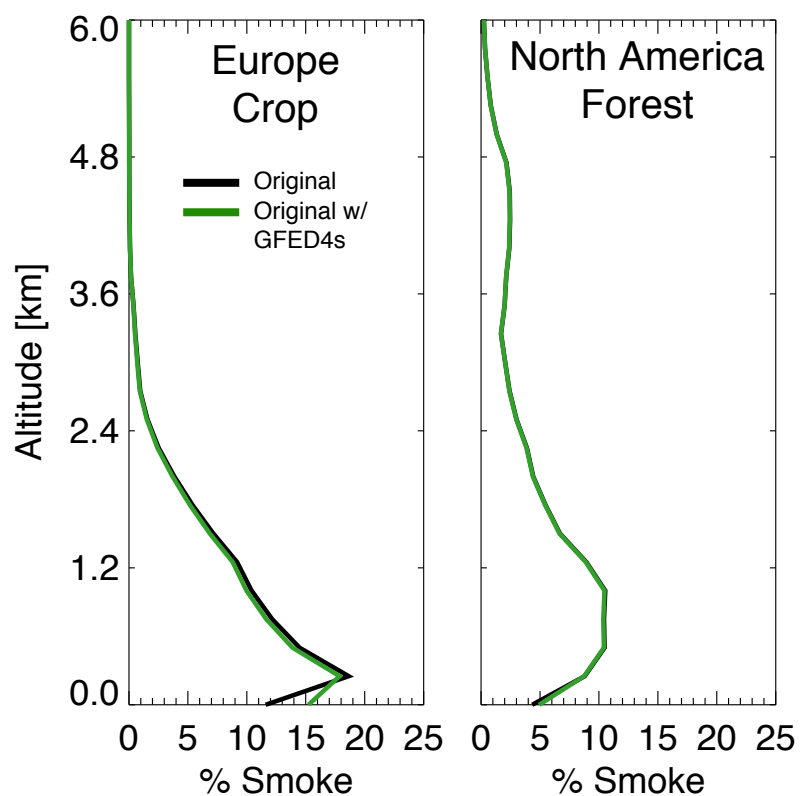

**Figure S6.** Vertical distribution of percentage of smoke calculated with the original+AOD-filled retrievals (black) and original+AOD-filled retrievals adjusted with the GFED4s fraction to account for small fires (green), over cropland fire in Europe and forest fires in North America.

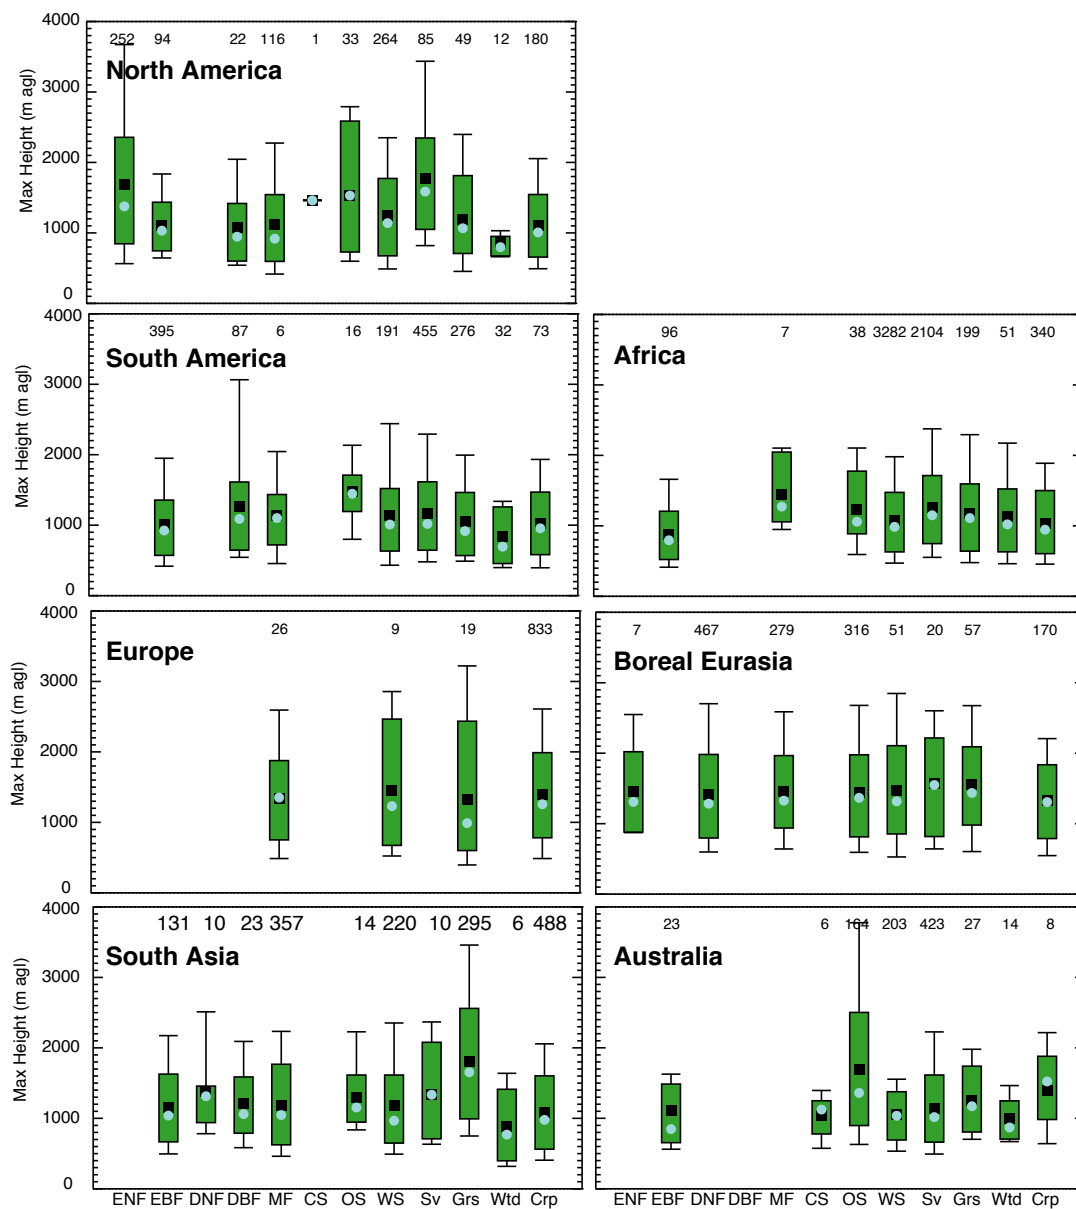

**Figure S7.** MISR maximum plume height summaries by region and biome. The medians (blue circles) and the means (black squares) are shown along with the central 67% (green boxes) and the central 90% (black whiskers). The number of observations included in each distribution are given in the annotation above each bar plot. Only distributions with more than 5 plumes are plotted.

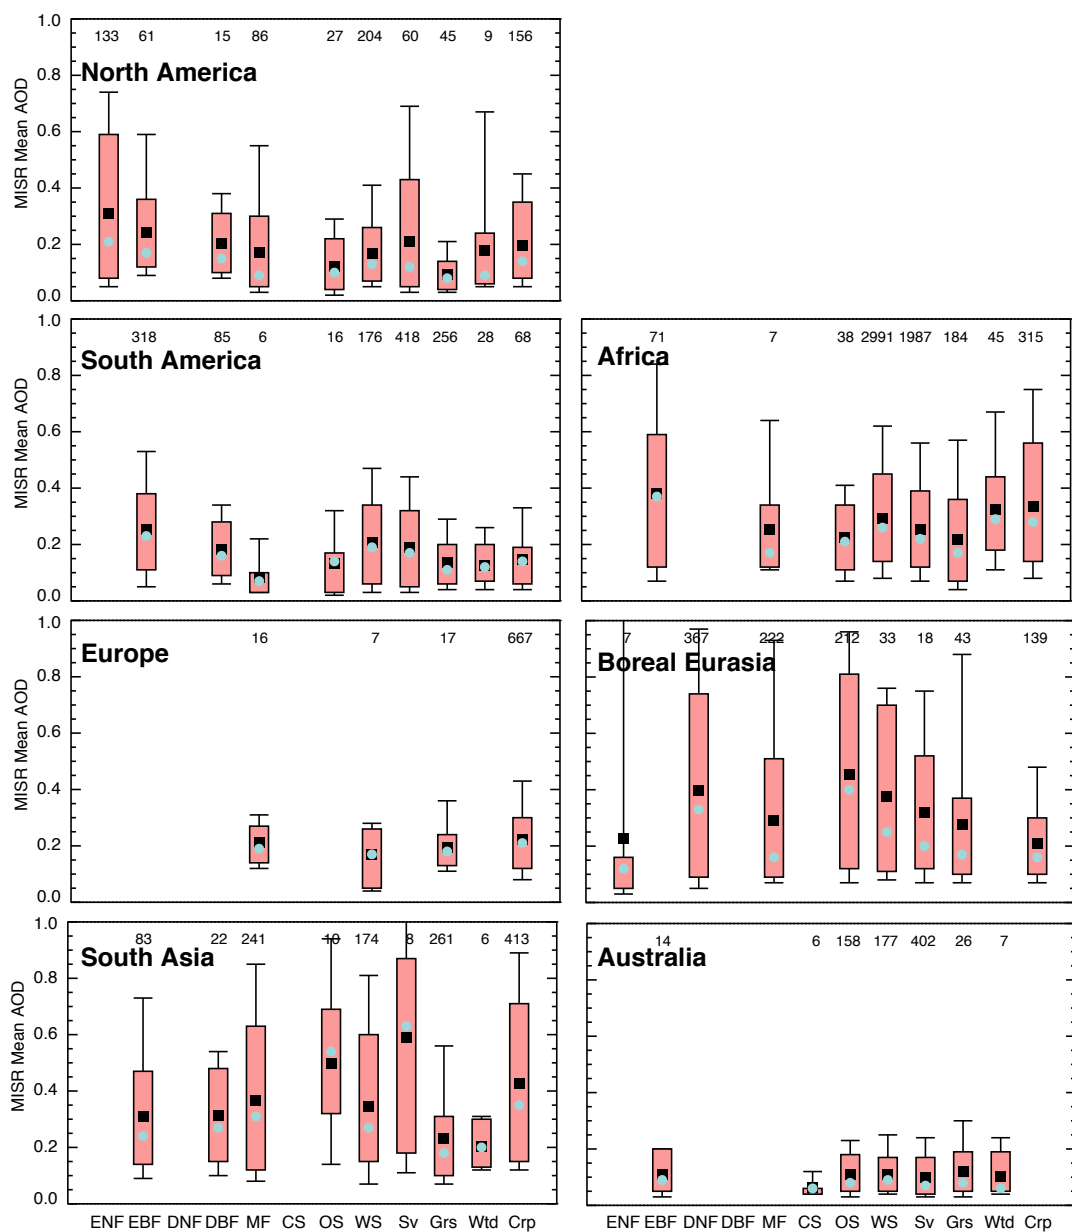

**Figure S8.** MISR mean AOD by region and biome. The medians (blue circles) and the means (black squares) are shown along with the central 67% (light red boxes) and the central 90% (black whiskers). The number of observations included in each distribution are given in the annotation above each bar plot. Only distributions with more than 5 plumes are plotted.

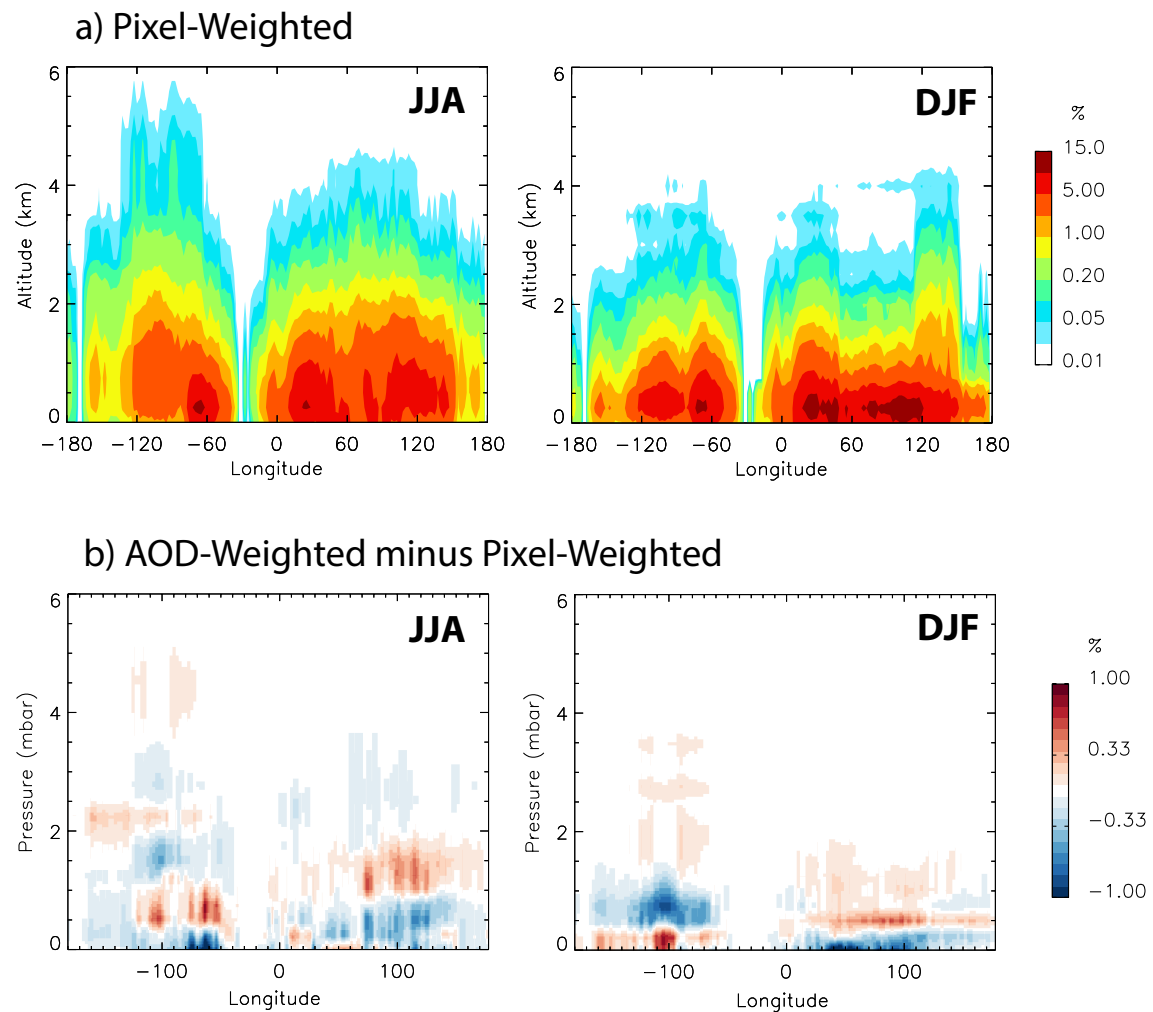

**Figure S9.** Zonal (80S-80N) averages of vertical distribution of biomass burning injection heights with the pixel-weighted method (%) for northern summer (JJA) and winter (DJF) (a). The difference between the AOD-weighted and pixel-weighted methods for JJA and DJF is also shown for comparison (b). The 2008 data were used for these plots.

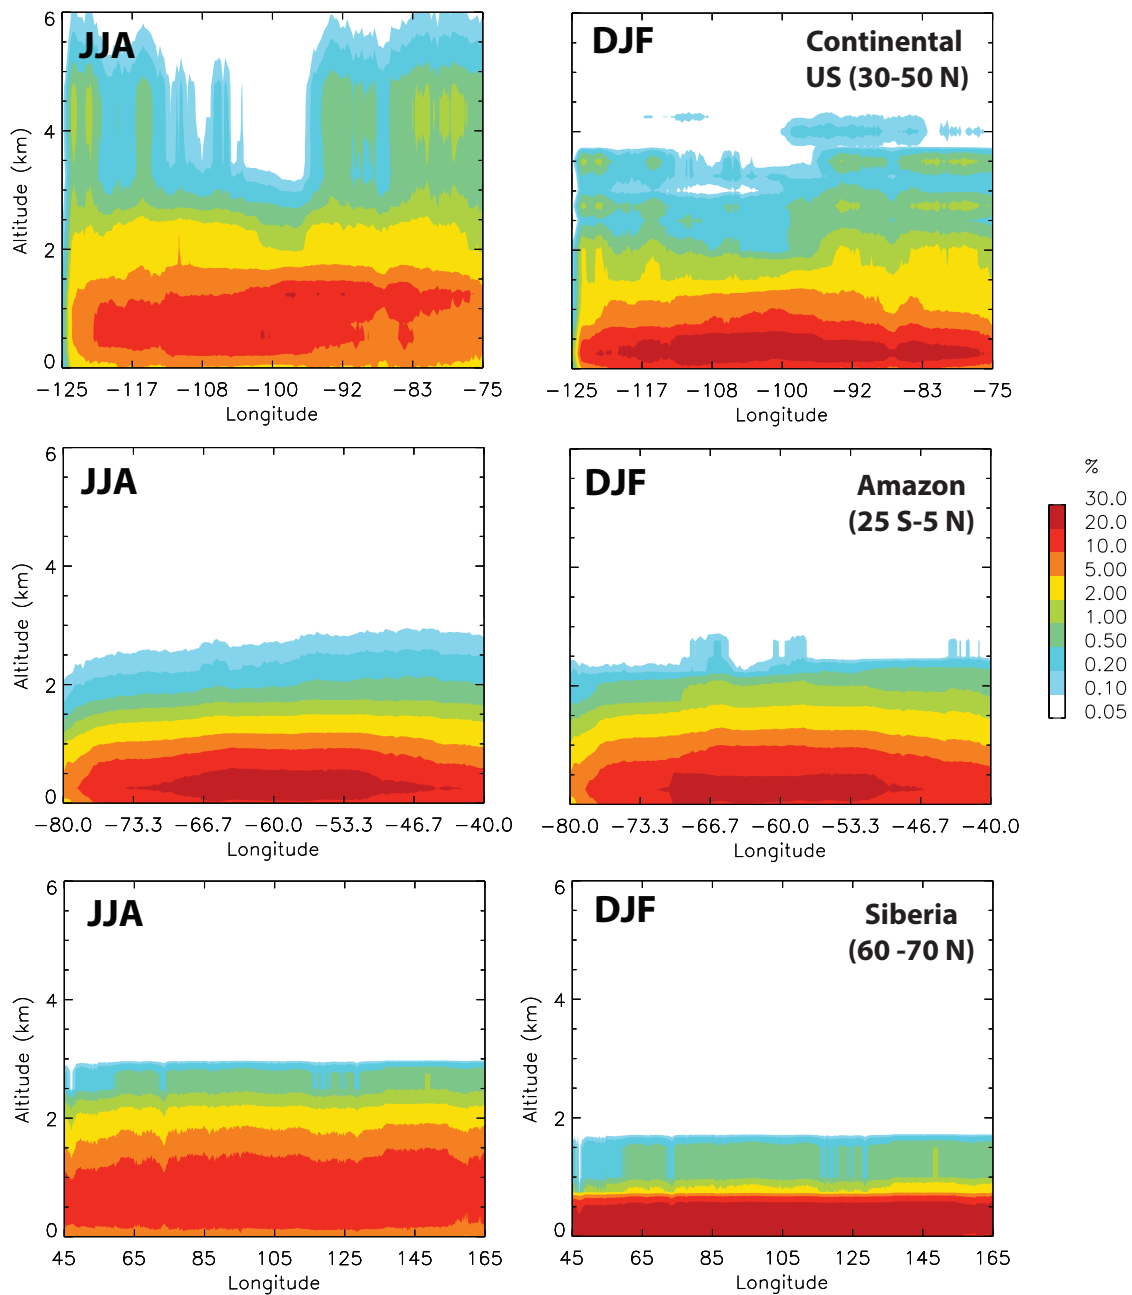

**Figure S10.** Regional zonal averages of vertical distribution of biomass burning injection heights with the AOD-weighted method (%) for northern summer (JJA) and winter (DJF).

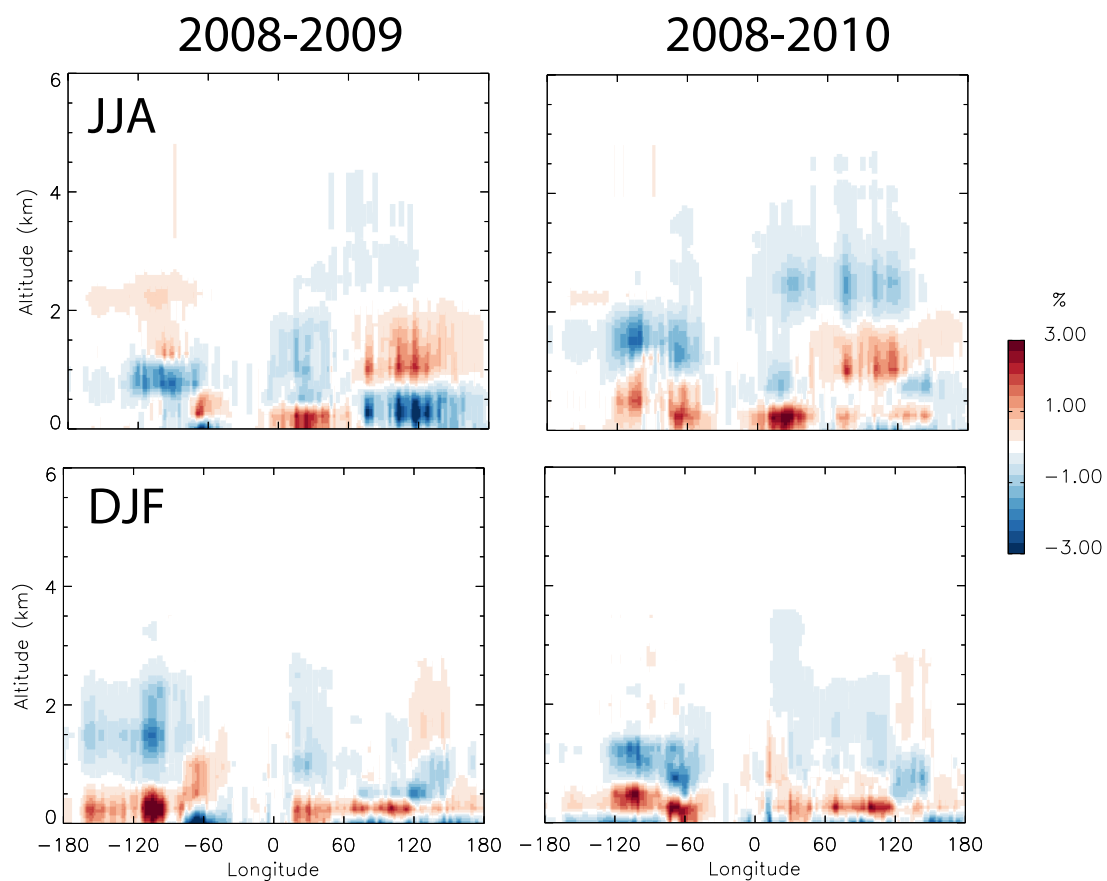

**Figure S11.** Differences in the zonal (80S-80N) annual average vertical distribution of biomass burning injection heights with the AOD-weighted method (%) for 2008-2009 and 2008-2010 for northern summer (JJA) and winter (DJF).

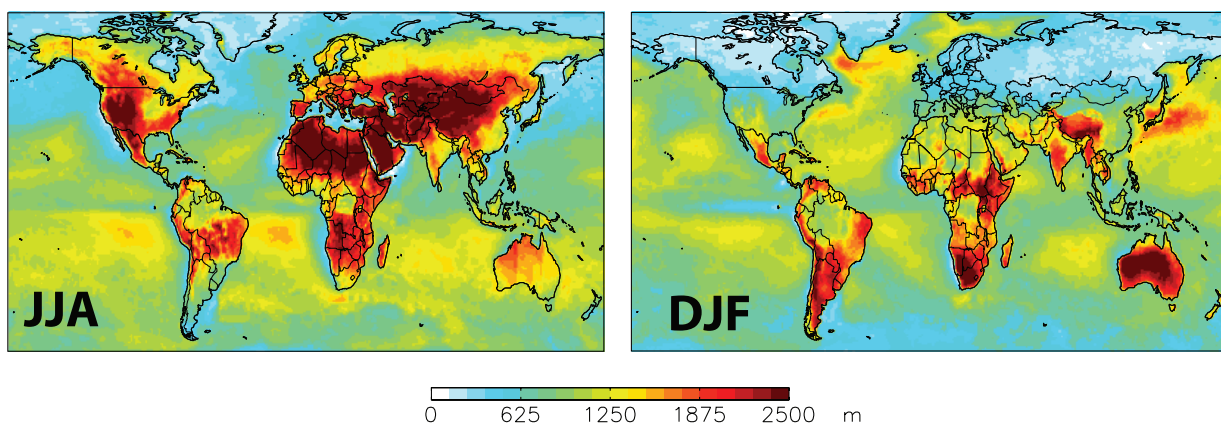

**Figure S12.** Global diurnal planetary boundary layer height from MERRA-2. Hourly PBL heights were average from 10 am to 13 pm (LT) to represent the MISR overpass time over the regions, for northern summer (JJA) and winter (DJF).
