# Supplementary material for: Development and implementation of a new biomassburning emissions injection height scheme for the GEOSChemmodel
Source: Copernicus journal article supplement (doi:10.5194/gmd-2018-93), 2018-06-15
Supplement: Supplementary file [file gmd-2018-93-AC1-supplement.zip]

Article

# A Global Climatology of Wildfire Smoke Injection Height Derived from Space-based Multi-angle Imaging

Maria Val Martin<sup>1,\*</sup>  and Ralph A. Kahn<sup>2</sup> 

<sup>1</sup> Leverhulme Centre for Climate Change Mitigation, Animal Plant Sciences Department, University of Sheffield, UK; m.valmartin@sheffield.ac.uk

<sup>2</sup> Climate and Radiation Laboratory, Code 613, NASA Goddard Space Flight Center, USA; ralph.a.kahn@nasa.gov

\* Correspondence: m.valmartin@sheffield.ac.uk; Tel.: +44 (0) 114 22 20090

Academic Editor: name

Version September 3, 2018 submitted to Remote Sens.

**Abstract:** We present an analysis of over 23,000 globally distributed wildfire smoke plume injection heights derived from MISR space-based, multi-angle stereo imaging. Both pixel-weighted and aerosol optical depth (AOD)-weighted results are given, stratified by region, biome, and month or season. This offers an observational resource for assessing first-principle plume-rise modeling, and can provide some constraints on smoke dispersion modeling for climate and air quality applications. The main limitation is that the satellite is in a sun-synchronous orbit, crossing the equator at about 10:30 local time on the day side. Overall, plumes occur preferentially during the northern mid-latitude burning season, and the vast majority inject smoke near-surface. However, the heavily forested regions of North and South America, and Africa produce the most frequent elevated plumes and the highest AOD values; some smoke is injected to altitudes well above 2 km in nearly all regions and biomes. Planetary boundary layer (PBL) versus free troposphere injection is affected by both the observed injection height and the PBL height; an example assessment is made here, but constraining the PBL height for this application warrants further work.

**Keywords:** MISR, Biomass Burning, Smoke Plumes Climatology

## 1. Introduction

The altitude at which wildfire smoke is injected into the atmosphere is an important predictor of how long smoke will stay aloft, how far it will travel, and ultimately, its environmental impact. Model simulations of smoke dispersion are especially sensitive to the difference between injection into the planetary boundary layer (PBL) and into the free troposphere above it, and often the elevation within the free troposphere can matter significantly as well, due to wind shear aloft [e.g., 1,2].

Although the majority of smoke plumes remain within the PBL, and many modelling efforts assume all smoke is introduced into this well-mixed, near-surface atmospheric layer, some larger fires produce both great quantities of biomass burning particles, and sufficient buoyancy to inject them to higher elevations. Early observational studies have shown that smoke injection height varies with geographic location, vegetation type, and season. For example, using plume heights derived from Multi-angle Imaging SpectroRadiometer (MISR) stereo imagery for Alaska and the Yukon during summer 2004, Kahn *et al.* [3] found that about 18% of fires in this region, vegetated primarily by boreal forest, injected some smoke above the PBL. Val Martin *et al.* [4] looked more broadly at MISR plumes for all of North America over five years, and showed that, conservatively, between 4% and 12% of fires overall injected above the PBL, but in distinct biome and season-related patterns (e.g., as much as

25% for shrubland), as well as with significant inter-annual variability. Above-PBL injection occurred preferentially in the boreal region and in summer, whereas smoke from cropland and grassland remained primarily within the PBL. For peat and tropical forest fires in Borneo and Sumatra, Tosca *et al.* [5] concluded, from an analysis of MISR plume heights lasting from 2001 to 2009, that although fire occurrence was modulated by El Niño, nearly all smoke injection in that region remained within the PBL. However, Mims *et al.* [6] showed that in Australia, even grassland fires could in fact create sufficient buoyancy to place smoke into the free troposphere. In extreme cases, where latent heat is involved, smoke can actually be carried through the troposphere and into the lower stratosphere [e.g., 7,8]. A further conclusion reached by several of these early studies is that when smoke is injected into the free troposphere, it tends to accumulate within layers of relative atmospheric stability aloft [4,9].

However, despite the need to accurately input smoke injection height for climate analysis and air quality forecasting, calculating plume rise from first principles has proven difficult. Physically, injection height depends primarily on the dynamical heat flux generated by the fire, the ambient atmospheric stability structure, and the degree to which ambient air is entrained into the rising plume [9,10]. Yet, constraining these quantities adequately for plume-rise calculations is not straightforward. The 4-micron brightness temperature anomaly, retrieved by space-based remote sensing instruments such as the NASA Earth Observing Systems MODerate resolution Imaging Spectroradiometer (MODIS) and labelled Fire Radiative Power (FRP), is widely used as a proxy indicator of dynamical heat flux [11,12]. In practice, FRP loosely correlates with injection height [e.g., 4,13], but quantitatively, it tends to underestimate heat flux, due in part to (1) 1 km<sup>2</sup> MODIS pixels only partly filled by fire, (2) overlying smoke opacity at 4 microns, and (3) fire elements having non-unit emissivity (e.g., smouldering) at 4 microns [3]. In both diagnostic and prognostic plume-rise models, 4-micron brightness temperature interpreted as fire-generated heat flux must be multiplied by factors of 5 or more to produce sufficient buoyancy to match observed smoke injection height [e.g., 9,13]. Among the three main physical factors, the ambient atmospheric stability structure is generally the best-constrained, a result of the advanced state of numerical weather prediction and reanalysis modelling, at least for relatively homogeneous and cloud-free, over-land cases [e.g., 14]. The parameterizations generally used to represent entrainment are even less well-constrained than the dynamical heat flux [9,13], likely due to the complex spatial and temporal distribution of convective elements in burning areas.

In a detailed evaluation of the state-of-the-art Freitas *et al.* [15] plume-rise model, in which the key input parameters were varied systematically over a broad range of values, Val Martin *et al.* [13] show that statistically, the model smoke plumes reaching higher altitudes are characterized by higher FRP and weaker atmospheric stability conditions than those remaining at lower altitude, which tend to remain confined below the PBL. However, the model simulations generally underestimate the plume height dynamic range observed by MISR and do not reliably identify plumes injected into the free troposphere. A main conclusion of the study is that an observationally based, statistical summary of wildfire smoke-plume injection heights, stratified by region, biome, and season, might offer the best available constraints, particularly for global-scale climate modelling [13]. Paugam *et al.* [10] comprehensively review the status of plume-rise modelling and reach a similar conclusion, as did Kukkonen *et al.* [16].

In this paper, we develop and present a climatology of smoke plume injection heights, stratified by region, biome, and season (Figure 1), based on over 23,000 plume heights retrieved from MISR stereo imagery. The tools used, aggregation and weighting approaches applied, and some limitations of the MISR plume-height record and our attempts at compensating for them, are discussed in Section 2. Results are given in Section 3, beginning with overall statistics on the collection of cases included in this study, then region-by-region smoke plume injection-height summaries, correlations of plume behaviour with meteorological factors, and an assessment of inter-annual variability. Conclusions are presented in Section 4.

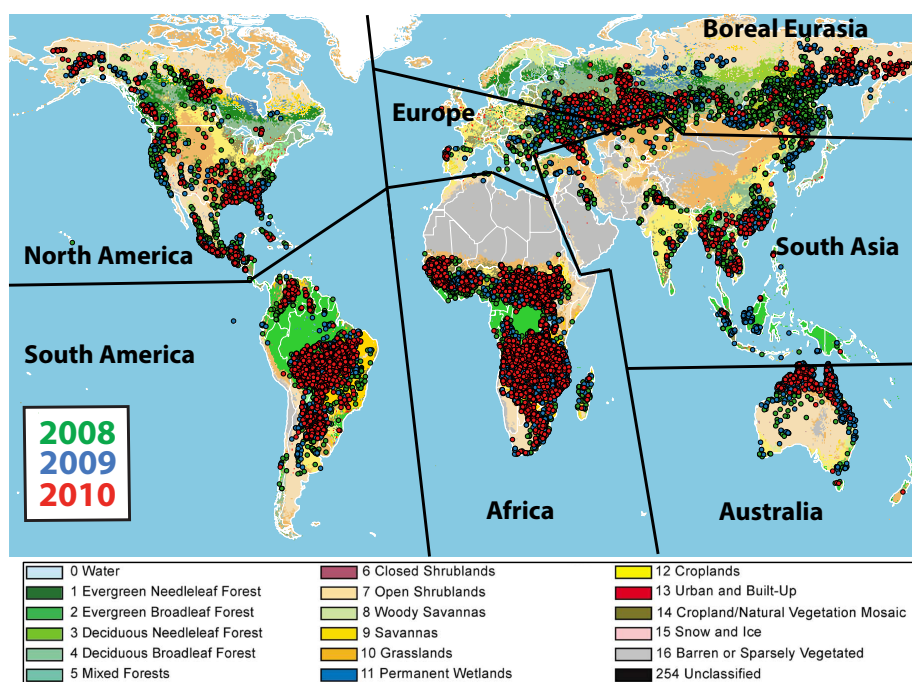

**Figure 1.** Geographic regions used in this study, and associated land-cover types, with dots indicating individual cases included in the dataset.

## 2. Methodology

The primary tool used here for deriving plume heights from MISR imagery is the MISR INteractive eXplorer (MINX) software [17]. MISR flies aboard the NASA Earth Observing System's Terra satellite, along with MODIS and three other Earth-observing instruments. MODIS 4-micron brightness temperature anomalies [18, <https://modis.gsfc.nasa.gov/data/dataproduct/mod14.php>] are used to help locate fires in the MISR imagery. This section summarizes the data and analysis approach used, along with the strengths and limitations of the MISR smoke plume injection-height dataset.

### 2.1. MISR Plume-Height Retrievals—MINX

The MISR instrument obtains imagery of each location within its 380 km-wide swath at nine view angles, ranging from 70° forward, through nadir, to 70° aft, along the orbit track, in each of four spectral bands centered at 446 (blue), 558 (green), 672 (red), and 866 nm (near infrared, NIR) wavelengths [19]. As it takes about 7 minutes for all nine views of a given location to be acquired, these data can be used to extract both the parallax and the proper motion of contrast features such as clouds and aerosol plumes [20,21]. For wildfire smoke, desert dust, and volcanic plumes in particular, more precise results can be obtained if the aerosol source, wind direction, and plume horizontal extent are specified explicitly by inspection of the imagery. The MINX tool asks the operator to provide these inputs interactively, and then calculates the wind speed and the elevation of contrast elements in the 1.1 km pixel data [17]. Both zero-wind and wind-corrected height retrievals are produced from both the red and blue-band imagery. The red-band data are acquired by MISR at 275 m horizontal resolution at all nine MISR view angles, and these provide the highest vertical resolution from the geometric retrieval approach. However, where contrast is poor within plume features and between the plume and the surface, blue-band retrievals, acquired at 1.1 km in the MISR off-nadir cameras, usually provide better plume-element discrimination. In this work, we selected plumes digitized having "good" or "fair" MINX quality flags, with the MISR color band (i.e., blue-band or red-band retrievals) judged as superior for each digitized aerosol region given within the database. As nearly all the smoke plumes in the current study were observed over land, blue band retrievals yielded better

quality results for 94% of the plumes in the database. In practice, vertical resolution of the MINX results is between 250 and 500 m. Heights reported by MINX are measured above mean sea level (MSL) in 250 m bins from 0 up to at least 12 km; where needed, terrain elevation must be taken into account explicitly.

As plume digitizing with MINX is a labor-intensive process, teams of students at the Jet Propulsion Laboratory, the NASA Goddard Space Flight Center, and the University of Sheffield, UK, participated over a period of years in collecting the data used in this study (see Acknowledgements, below). Global smoke-plume data for the years 2008, 2009, and 2010 are included in the dataset. Data acquired for individual plumes were stratified by region, season, and biome, and stored by geographic region in MINX digitized aerosol region (DAR) files. Biomes are associated with geographic regions based on the Global Land-cover Types; there are 18 vegetated land cover types from among the 22 in this database [22]. For the current study, the wildfire plumes were stratified into 12 of these biomes, covering the major vegetation types around the globe (Figure 1): Evergreen Needle Leaf Forest ("EN Forest"), Evergreen BroadLeaf Forest ("EB Forest"), Deciduous Needle Leaf Forest ("DN Forest"), Deciduous BroadLeaf Forest ("DB Forest"), "Mixed Forest", "Closed Shrub", "Open Shrub", "Woody Savanna", "Savanna", "Grassland", "Wetland" and "Cropland." Plume coverage and distribution statistics for this dataset are summarized in Section 3.1 below.

## 2.2. Determining Stereo-Height-Retrieval Smoke Concentration for Individual Plumes

To develop a parameterization of fire emission injection height, we need to determine the percentage of smoke injected into different altitude bins. The distributions of AOD and smoke plume stereo-height values are both involved. For pixels within the plume having both AOD and height retrievals, we assign the AOD to the retrieved height. This assumes that the column mid-visible aerosol optical depth at 558 nm ( $AOD_{558}$ ) for each pixel is concentrated in the retrieved-altitude layer of that pixel. Although this might not be true for the pixels immediately around the fire source due to the vertical extent of the smoke column, for the plume overall, smoke tends to concentrate either in the PBL or within thin ( $\sim 1$  km) layers of relative atmospheric stability aloft [4,9]. With this assumption, the smoke amount at a specific elevation for the entire plume is equal to the sum of AOD values associated with all pixels in the plume region assigned to that elevation. AOD from the MISR Standard Version 22 aerosol product is reported at 17.6 km resolution and is included in the MINX output for each plume. The 1.1 km MINX pixels within the AOD retrieval region are given this value.

However, the distributions of smoke plume stereo height and AOD values each can have near-source biases. The percentage of available and missing individual retrievals with AOD and stereo-height values in the dataset, stratified by biome, is shown in Figure 2. The forest biomes have fewer samples though generally bigger fires than the crop, shrub, grass, and savannah biomes. Partitioning of retrieval results also tends to vary more among the forest biomes. Overall, between about 45% and 65% of all pixels in all designated plume areas have stereo height retrievals and between 35% and over 80% have AOD results. But only about 2–15% of all pixels are missing both AOD and height values.



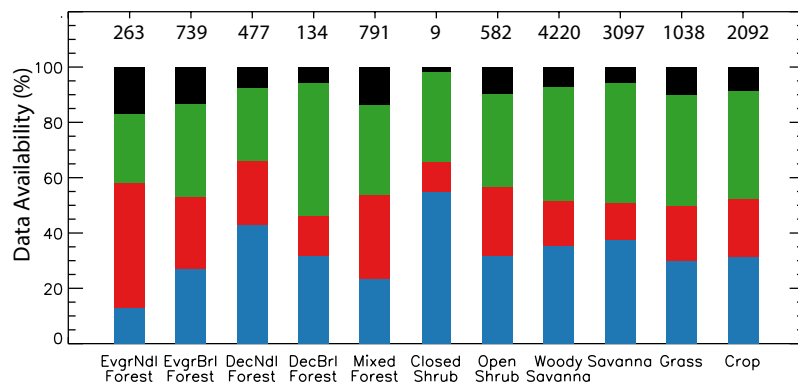

**Figure 2.** Data availability in the 2008 plume dataset determined per biome. Bars represent percentage of individual pixels with both stereo-height and AOD retrievals (blue), percentage with height but missing AOD retrievals (red), percentage with AOD but missing stereo-height retrievals (green) and percentage with missing stereo-height and AOD retrievals (black). The number of plumes included in each distribution is given above the bar plots.

This dichotomy is explained as follows: very high plume AOD favors height but not AOD retrievals, whereas low AOD favors AOD but not plume-height retrievals. Specifically, when the aerosol mid-visible optical depth exceeds a value between about 0.4 and 1, the retrieval tends to underestimate AOD [23], and when the AOD exceeds values around 2 or 3, the plume becomes too optically thick for the surface to be visible in the multi-angle imagery, and the AOD retrieval is indeterminate. This occurs in the optically thickest parts of large plumes.

Conversely, at very low AOD, contrast features in the plume can be difficult to discern in the imagery, and stereo height retrieval becomes progressively more difficult to obtain. The specific conditions under which this occurs depend on the aerosol and the surface properties. In practice, the percent of pixels missing height retrievals depends on how much of the plume has well-defined or poorly-defined features, and also on how the MINX operator defines the limits of the plume area. Picking a larger plume area, where the AOD in places might be low and the existence of the plume might be ambiguous, will yield a larger percent of pixels missing height retrievals. This is illustrated in Figure S1 in Supplemental Material, which gives an example of a plume with high stereo-height retrieval density and one with low stereo-height retrieval density. We designate the percentage of stereo-heights that fills the plume area as a measure of "stereo-height retrieval density" (PcntHtsFilled in the DAR files). This density is given by the number of successful stereo-height retrievals multiplied by the area of a single retrieval pixel ( $1.21 \text{ km}^2$ ) and divided by the total area of the plume ( $\text{km}^2$ ). We examine the relationship between mid-visible AOD and PcntHtsFilled in plumes in Figure 3, which shows the distribution of AOD relative to PcntHtsFilled for evergreen needleleaf forest. As expected, the largest average AOD values (0.5) are associated with the largest PcntHtsFilled values (75–100%). Similar relationships are found for each biome considered in the study, except for deciduous boreal forests and grasslands (see Figure S2 in Supplemental Material).

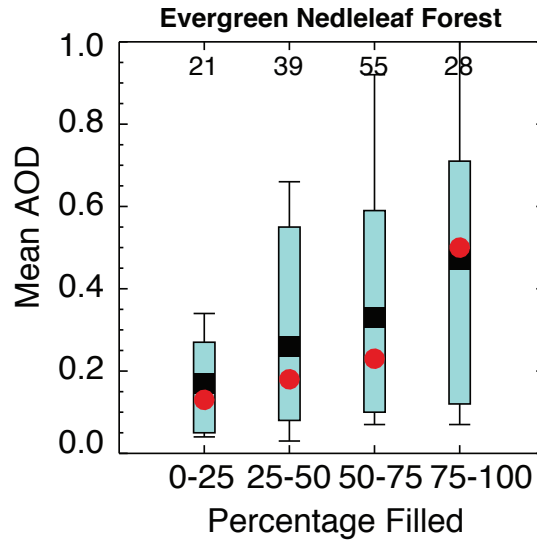

**Figure 3.** Distribution of mean AOD<sub>558</sub> with respect to percentage of the DAR filled with successful retrievals (PcntHtsFilled) over evergreen needle-leaf forest. The medians (red circles) and the means (black squares) are shown along with the central 67% (light blue box) and the central 90% (black whiskers). Similar plots for other biomes are given in Figure S2 in Supplemental Material. The number of cases is indicated at the top of each boxplot.

We aim for a practical approach that makes use of the unique information these data provide, and then characterize the uncertainties to the extent possible. Missing AOD values are filled with the maximum AOD recorded in that plume. Lacking additional information, this provides at least lower bound on the AOD, and in most cases, the highest AOD pixels represent a small fraction of the total plume area.

Filling missing stereo height values for the current application requires a more involved process. The low number of stereo heights retrieved for plumes with low PcntHtsFilled is generally associated with poor plume optical quality (i.e., low AOD, situations for which we usually have measured AOD but not height values), rather than a complete lack of smoke within the DAR. To reduce the potential bias that would occur by treating all raw individual stereo-height retrievals equally, we therefore smooth out inconsistencies among plumes characterized by different stereo-height retrieval densities using the AOD-PcntHtsFilled relationship. Our approach is to "fill the non-retrieved height points within the DAR using points randomly sampled from a distribution that best fit the available retrieved height points". The underlying assumption here is that smoke elevation for locations within the plume area that do not produce height retrievals follow a height distribution statistically similar to that of the locations for which retrievals were obtained. This assumption is supported by the typically thin smoke layering downwind of the immediate source, and is explained by the extent to which the main factors determining the actual smoke plume height are affected more by initial plume buoyancy and atmospheric stability structure than by smoke amount.

To identify the statistical distributions of plume height, we carried out a fitting analysis separately for each biome. This consists of a linear regression of the dataset  $\{f_{\Theta}(z_i), \Theta^{-1}[\frac{(i-0.5)}{N}]\}$ ,  $i = 1, 2, \dots, N$ , where  $z_i$  is the MISR stereo height,  $\Theta^{-1}$  is the inverse of the theoretical cumulative distribution frequency (CDF, computed numerically),  $N$  is the number of successful retrievals in a plume, and  $f$  is a function that relates  $z_i$  to  $N$ , and depends on the type of CDF under consideration [24]. The fit analysis is conducted by testing different types of CDF (e.g., uniform, log normal, etc.). The "goodness" of fit for the sampled distribution is assessed based on the accuracy with which the  $z_i$  versus  $N$  regression

line approximates the sample. This accuracy is quantified in relation to how well the coefficient of determination  $r^2$  approaches unity. An analysis of the robustness of this filling approach is given with Figure S3 in Supplemental Material.

Our fitting analysis shows that for the MISR plume database, 46% of the plumes fit a normal effective  $N$  versus height distribution, and 54% fit a lognormal distribution. The difference is probably related to differences in the vertical stability structure of the atmosphere at the altitude of the smoke layer. For example, Val Martin *et al.* [13] (figures 1 and 6) show cases where normal vertical distributions are associated with weak atmospheric stability, and log-normal distributions correspond with strong stability. The  $r^2$  values exceed 0.85, 0.90 and 0.95 for about 94%, 86%, and 58% of the plumes, respectively. For each plume, the new points are sampled from a distribution, either normal or lognormal, having the same average as the points successfully retrieved and a standard deviation calculated from that of the successful retrievals appropriately increased to account for the  $\pm 500$  m measurement uncertainty associated with MISR plume heights. In addition, to avoid including points very near to or on the ground, we limit the minimum height to 250 m. Table S1 summarizes the equations used in this fitting approach. Figures 4 (a) and (c) show examples of the pixel-count-weighted vertical distribution of the stereo-height retrievals for two plumes that fit normal and lognormal distributions, respectively, with and without the smoothing approach.

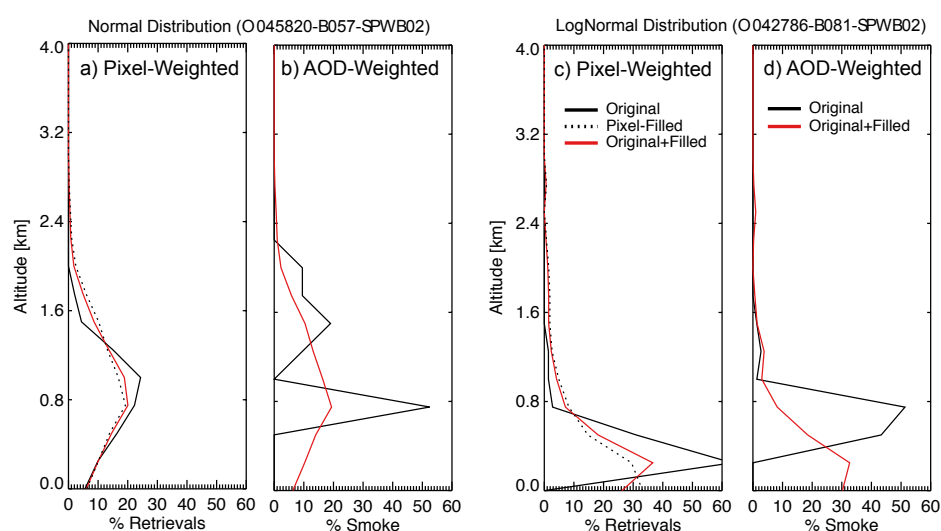

**Figure 4.** Examples of stereo-height retrieval vertical distributions for smoke plumes with normal (O045820-B057-SPWB02, shown in Figure S1 bottom row; panels a and b here) and lognormal (O042786-B081-SPWB02; panels c and d here) distribution fits. (a) and (c) Distributions weighted by pixel counts. Solid black lines indicate original successful retrievals, dashed black lines represent missing retrievals that were filled as described in Section 2.2, and red lines are the sum of original and filled retrievals. (b) and (d) Distributions weighted by AOD. Solid black lines indicate original retrievals with AOD values, and red lines are the sum of original AOD and filled retrievals, in which missing AOD values were filled by the maximum AOD in each plume.

As an alternative approach, we present the AOD-weighted vertical distribution of smoke, by calculating the percentage of smoke in each 250 m bin using the AOD. For that, we first calculate the total AOD in each 250-m bin and then determine the corresponding percentage with respect to the total column. As in the stereo-height retrievals and to avoid including a potential bias due to missing stereo-height retrievals without AOD values, we filled the missing AOD data with the maximum AOD recorded in each plume, as discussed above. Figure 4 (b) and (d) show examples of AOD-weighted vertical profiles with the original and original + filled AOD values.

### 2.3. Aggregation by Region and Biome

Individual cases, as treated in Section 2.2 above are then aggregated by region and biome, giving percent injection heights at the MISR 250 m levels. Figure 5 shows examples of the normalized, pixel and AOD-weighted heights as retrieved by MISR for each 250 m altitude bin, including all the plumes over the North American mixed forest fires and African woody savanna. These are clear examples in which the filling technique yields vertical distributions of stereo-height retrievals slightly spread out towards the tails of the original distribution. This effect is important for plumes characterized by low numbers of successful retrievals. Additional vertical distributions for other biomes are given in Figures S4 and S5 in Supplemental Material for the pixel-weighted and AOD-weighted distributions, respectively.

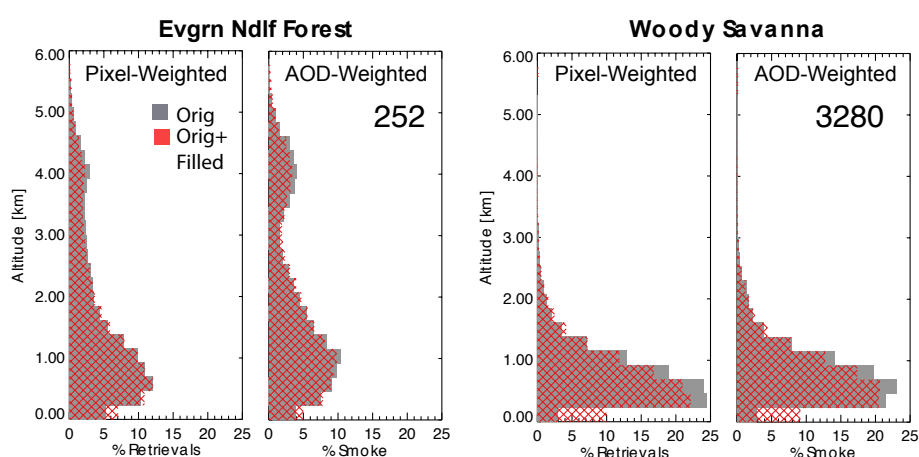

**Figure 5.** Vertical distribution of percentage of pixel-weighted and AOD-weighted stereo-height retrievals in 250-meter bins for original retrievals (gray) and the missing height and AOD-filled retrievals (hatched red), over North American evergreen needleleaf forest and African woody savanna. Numeric annotations indicate the number of plumes in each classification.

### 2.4. Limitations of the MISR Plume-Height Record Sampling

Some limitations of the MISR plume-height record sampling include: (1) the 380 km-wide MISR swath, which limits global coverage to about once per week, varying with latitude from 8 days at the equator to 2 days near the poles, (2) the day-side equator crossing time for the Terra satellite carrying the MISR instrument is 10:30 AM, well before the afternoon peak in fire activity at most locations, (3) the inability to observe smoke plumes in the presence of overlying cloud cover, and (4) the lower bounds on fire and plume size that are detectable from remote sensing. A brief assessment of the biases associated with these issues, and attempts at compensating for them, are covered here.

The vast majority of small fires inject smoke only into the PBL. To account for small fires that are typically under-detected by MISR, we apply a correction to the lowest level of our vertical profiles (0–250 m). Based on Randerson *et al.* [25], we calculate the fraction of small fires that were potentially missed by MISR, using the area burned estimated by GFED4s from large and small fires in each of our regions, biomes and season. We classify seasons as northern hemisphere spring (MAM), summer (JJA), fall (SON) and winter (DJF). Table S2 in Supplemental Material summarizes the minimum and maximum correction fractions applied to the lowest level of our distributions to account for small fires. To normalize the distribution throughout the column, we adjust the remaining fractions evenly to sum to unity. Figure S6 shows two examples of this correction. For cropland fires over Europe during the summertime, we apply a correction of 30%, and the percentage of smoke injected in the lowest level is increased from 11.6 to 15.2%. The fraction of small fires over forests in North America is smaller (13%) and a lower increase from 5.1 to 5.7% is applied.

Accounting for the other MISR sampling limitations is more difficult. For example, at least a qualitative assessment of the diurnal representativeness of the MISR plume-height record might be made by comparing the FRP from Terra MODIS with corresponding values from satellites in other polar orbits, such as the MODIS instrument on NASA's Aqua satellite, and possibly geostationary FRP detectors. Such extensions would be worth exploring, but are beyond the scope of the current study.

### 3. Results

We begin this section with summary statistics characterizing the plume-height dataset overall, followed by the analysis of more detailed, region-specific behavior. The section concludes with a brief consideration of possible relationships between the observed plume injection and boundary layer elevation.

#### 3.1. Smoke Plume Coverage and Distribution Statistics

Figure 6 presents a statistical summary of the number of plumes stratified by year, month, geographic region and biome. The largest number of plumes were digitized for year 2008, with about 13,000 plumes (56% of the total climatology), versus about 5,700 and 4,600 plumes in 2009 and 2010, respectively. We note that the 2008 plume record is missing two weeks in October (1–16th) due to a MISR instrument technical problem and that the 2010 record includes plumes for all but three months: April, June, and December.



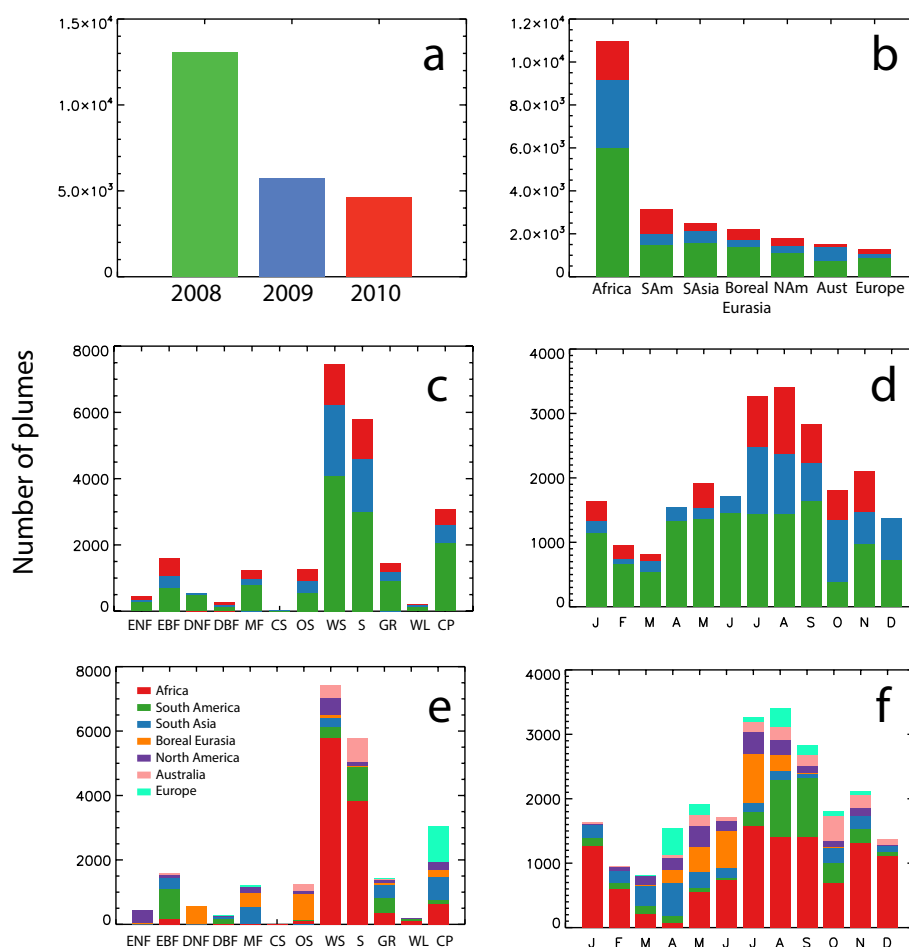

**Figure 6.** Summary of the MISR plume height database stratified by (a) year, (b) region and year, (c) biome and year, (d) month and year, (e) biome and region, and (f) month and region. The 12 biomes included in this dataset are listed at the end of Section 2.1, and illustrated in Figure 1.

Most of the plumes in this database (40%) occurred between July and September (Figure 6d), which is typically the peak of the burning season in mid-latitude vegetated regions. Boreal fire counts peak in northern spring and early summer (May–July; Figure 6f). The fire season in Africa has two peaks, in northern mid-late summer (JAS) and in southern early-mid winter (NDJ). Africa is also the fire region with the largest number of plumes (47%; Figure 6b), though they are generally smaller than boreal forest fires, and tend to produce less smoke per fire. The dominant biomes in terms of fire counts are woody savanna (32%) and savanna (25%), follow by croplands (13%).

Some additional characteristics of the overall dataset are included in Supplemental Material. In particular, Figures S7 and S8 summarize the maximum plume heights and mean AOD, respectively, stratified by region and biome, and Table S3 provides maximum height and AOD data, stratified by biome and year. Sampling varies considerably by biome and region, in part because some biomes dominate in certain regions. Further, individual fires occur much more frequently in some biome types, such as savannah and cropland, than in forests. As anticipated from Figure 2, in Africa, South America, and Boreal Eurasia, the savannah, grass, and crop maximum plume-height distributions tend to be similar (Figure S7). The mean AOD, shown in Figure S8, depends in part on how the plume area is defined (e.g., Figure S1), and is much more variable than maximum height for most regions. In regions containing substantial areas of thick forest, such as North and South America, and Africa, the forest

biomes tend to produce the highest mean and most extreme AOD plumes, as might be expected. For Boreal Eurasia, open shrubland and woody savannah tend to produce comparably elevated plumes.

Our dataset is designed primarily to assess injection height for fires in the dominant biomes of each major biomass burning region. These are statistically well-represented in our dataset. Within the sampling limitations discussed in Section 2.4 above, the patterns suggest that we have sufficient statistics for this purpose, at least for early to mid-day local time, which is when MISR acquires data.

### 3.2. Global and Region-Specific Plume Injection Height Statistics

The main result of this paper is illustrated in Figure 7, which shows the AOD-weighted and pixel-weighted plume height distributions for the entire dataset, aggregated over each of the seven primary biomass burning regions and four most widely distributed biomes in our dataset. The full AOD-weighted and pixel-weighted digital data are presented in Tables S4 and S5, respectively. Similar plots, for all 12 biomes, are given in Figures S4 and S5 in Supplemental Material for pixel-weighted and AOD-weighted vertical distributions, respectively, with the full digital data in Table S6.

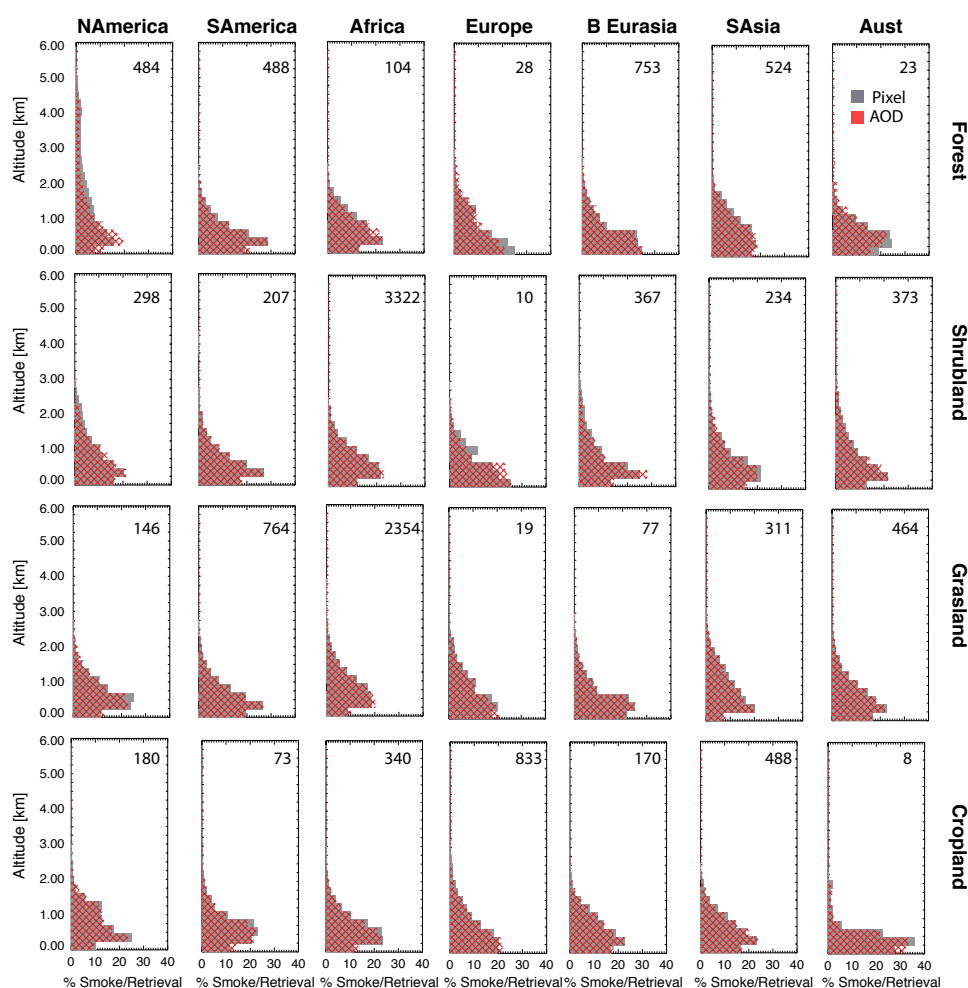

**Figure 7.** Vertical distribution of percentage of pixel-weighted (grey) and AOD-weighted (hatched red) stereo-height retrievals in 250-meter bins. Profiles show the stereo-height retrievals pixel-filled and AOD-filled and adjusted by the GFED4s to account small fires. Numeric annotations indicate the number of plumes in each classification.

The dominance of near-surface injection is evident in Figure 7. However, smoke is injected to altitudes well above 2 km at times in nearly all the regions and biomes shown. This is easier to discern in Figure 8, which provides zonally averaged, seasonally stratified, AOD-weighted percent injection as a function of longitude and altitude. (The corresponding pixel-weighted values, and plots of the difference between AOD-weighted and pixel-weighted values, are given in Figure S9 in Supplemental Material. There is very little difference between the AOD and pixel-weighted plots with this broad aggregation.) Averaged over the western hemisphere, smoke is injected into the mid-troposphere in northern spring, summer, and autumn, with peak heights occurring in summer, as might be expected. The eastern hemisphere produces a secondary peak in the global distribution that actually spans the entire year, and includes most of the region during northern spring and summer, but tends to be concentrated in the western and eastern extremes in autumn and winter. Injection-height seasonal variations show considerable regional dependence, and they tend to be greater in the boreal regions than in the tropics, also as expected. This appears in Figure S10 in Supplemental Material, which presents injection-heights stratified regionally for Continental US, Amazon, and Siberia; seasonal differences are greatest over North America (where summertime boreal fires tend to be most severe), are also significant but more muted over Siberia, but are negligible over the Amazon.

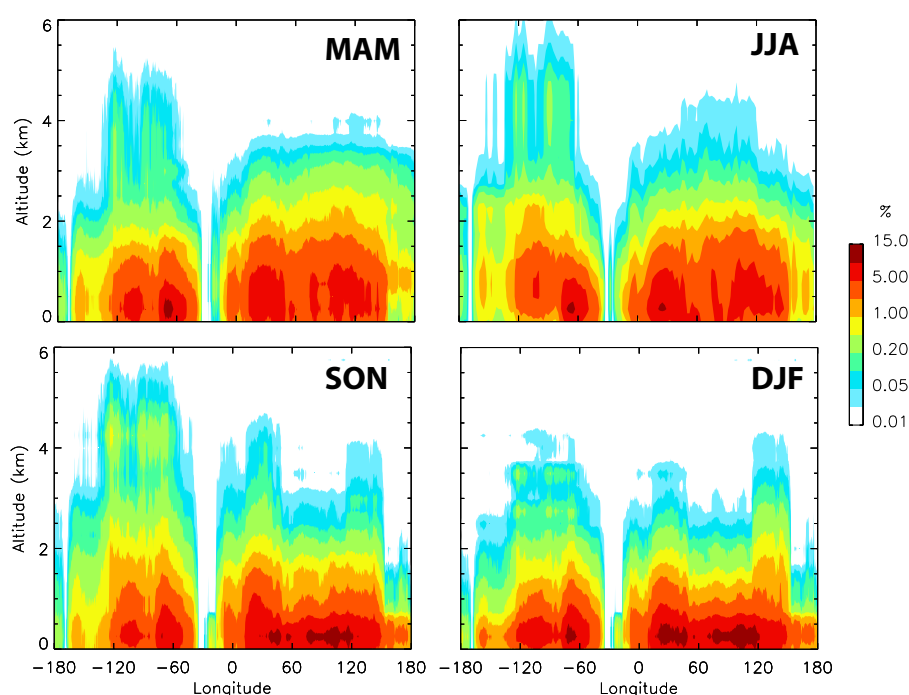

**Figure 8.** Zonal (80S–80N) averages of vertical distribution of biomass burning injection heights with the AOD-weighted method (%) for northern spring (MAM), summer (JJA), fall (SON) and winter (DJF). The 2008 data were used for these plots.

Fire severity also varies significantly from year to year, especially on a regional basis [e.g., 26]. This is illustrated in Figure 9, which shows the zonally and annually averaged, AOD-weighted plume height distribution covering available data for the three years in our dataset. Interannual differences in the zonally and annually averaged plume-height distributions are given in Figure S11. Even in the averaged data, it is evident, for example, that in the western hemisphere, the peak injection heights, e.g., around longitude -120, were greater for 2008 than 2009 and 2010, corresponding to an especially severe summer fire season in California, when over 380,000 acres burned, compared to about 81,000 acres in 2009 and under 134,500 acres in 2010 [27]. In the eastern hemisphere, peak injection was less and injection was concentrated closer to the surface in 2008 than in 2009 and 2010.

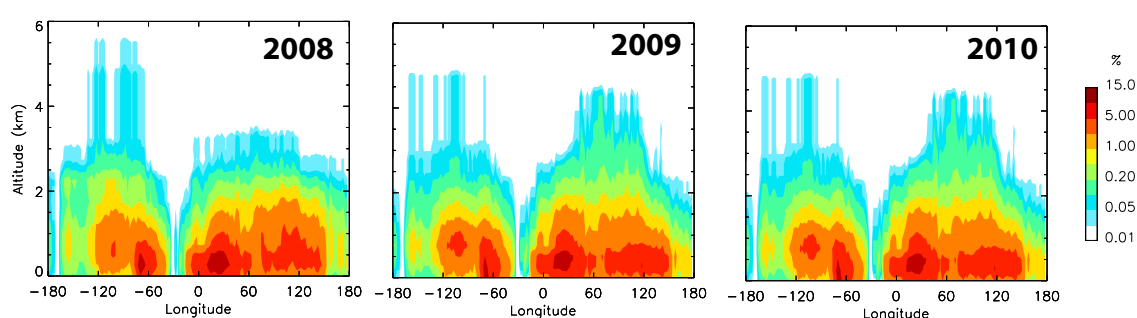

**Figure 9.** Zonal (80S–80N) annual averages of vertical distribution of biomass burning injection heights with the AOD-weighted method (%) for 2008, 2009 and 2010.

There is a deeper question that addresses when and where smoke tends to be injected above the local planetary boundary layer (PBL) into the free troposphere (FT). The challenge here is defining the PBL height for this application, which is not straightforward [e.g., 4]. Modeling results vary, and measurements are best primarily in the few locations globally where radiosonde or lidar data are acquired. To make a preliminary assessment of where and when injection height above the boundary layer was more frequent, we use the PBL heights given by the second Modern Era Retrospective-analysis for Research and Applications (MERRA-2) [28], shown in Figure S12 in Supplemental Material. These PBL height data are at a horizontal resolution of  $0.625^\circ$  longitude by  $0.5^\circ$  latitude and a vertical resolution of 42 levels of vertical pressure-levels between the surface and 0.01 hPa. MERRA-2 provides hourly PBL above ground level and we determine the PBL height at the time of the MISR overpass time at each MERRA grid, that is, we average the PBL heights at 10:00–13:00 Local time. Figure 10 presents one assessment of the PBL-FT injection-height dichotomy. Given the uncertainties in the plume and BL heights, in Figure 10, we added 500 m to the nominal MERRA-2 BL height values, providing a conservative estimate of the fraction of plumes injection into the FT. Globally, injection occurs most often into the PBL, and significant injection into the FT is found primarily in the boreal forests of North America and Siberia in northern summer. As the PBL itself is generally lower in the local winter season (Figure S12), the percent injection into the FT based on the MERRA assessment expands geographically in northern winter to include parts of the eastern US and Canada, as well as parts of subtropical west Asia (Kazakhstan) and northeast China. Given the uncertainties discussed above, more detailed, regional assessments, beyond the scope of the current paper, would be needed to take advantage of the quantitative injection-height values derived from the multi-angle stereo observations.

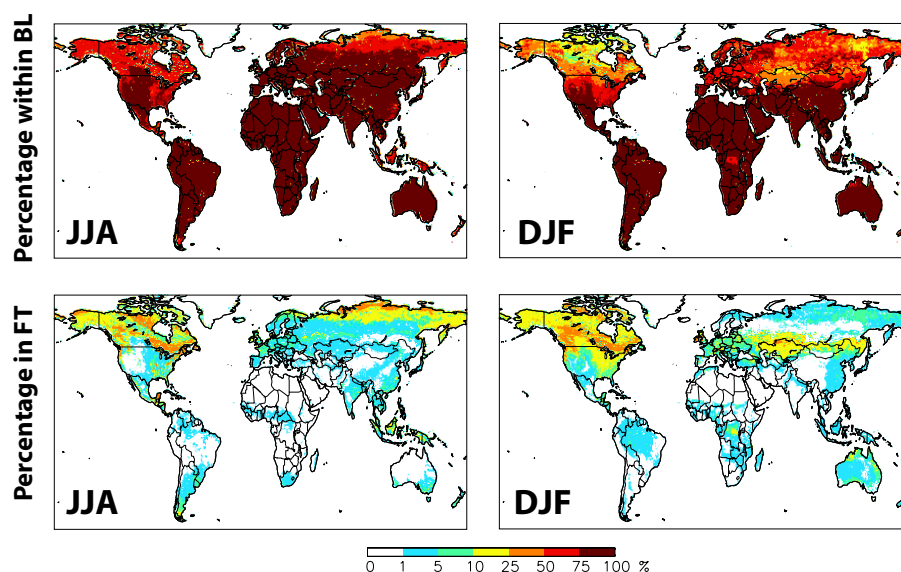

**Figure 10.** Percentage of total column biomass burning emissions emitted within the BL and into the FT (above PBL+500 m to 6 km) in each grid cell in northern summer (JJA) and winter (DJF), based on the estimated AOD-weighted injection heights.

#### 4. Conclusions

We present an analysis of over 23,000 wildfire smoke plume injection heights derived from MISR space-based, multi-angle stereo imaging. The results are aimed at providing an observational resource, to complement and help improve first-principle attempts at modeling wildfire plume rise, and as a constraint on modeling smoke dispersion for climate and air quality applications. Both pixel-weighted and AOD-weighted statistics are included, and the results are stratified by region, biome, and month or season. Interannual variability is assessed by comparing the full global dataset from 2008 with partial data from 2009 and 2010, which captures moderate and severe fire seasons in different regions.

The main limitation of the dataset as a constraint on general smoke-plume-injection modeling is that diurnal coverage is precluded by the sun-synchronous MISR orbit, crossing the equator at approximately 10:30 local time on the day side. There is also a lower limit to the size of wildfires that can be detected by the spacecraft instrument, though most such fires inject smoke only into the PBL, and meteorological cloud masking underlying smoke is an issue in some regions. Missing AOD values occur preferentially in the optically thick parts of plumes, whereas missing stereo-height retrievals are found most often in the thin plume periphery. We filled the missing AOD values with the maximum AOD values observed in the plume, which provides a conservative lower bound on the actual AOD for those pixels in most cases. The missing stereo heights were filled based on the statistical distribution of observed heights for the plume in question, as the missing height retrievals tend to occur in low AOD regions toward the plume edges. These filling techniques yield stereo-height vertical distributions that are slightly spread out towards the tails of the original distributions.

Within the MISR plume database, the retrieved elevations of smoke pixels for about half the plumes are best represented as a normal distribution, whereas about half are better fit with a lognormal distribution. The difference is probably related to differences in the vertical stability structure of the atmosphere at the altitude of the smoke layer. Overall, the plumes occur preferentially (about 40% of the total) during the northern mid-latitude burning season, between July and September, but with significant regional differences (Figure 6). The savanna biomes provide the highest fire counts, whereas the heavily forested regions of North and South America, and Africa produce the highest mean and most extreme AOD plumes. Open shrubland and woody savannah in Boreal Eurasia also tend to produce comparably elevated plumes.



Figure 7 and Figures S4 and S5 in Supplemental Material summarize the features of the database, and Tables S4, S5, and S6 in Supplemental Material present the digital data for both pixel-weighted and AOD-weighted results. The dominance of near-surface injection is evident in these data, but some smoke is injected to altitudes well above 2 km at times in nearly all regions and biomes. Injection-height seasonal variations tend to be greater in the boreal regions than in the tropics; interannual variability is also substantial, especially on a regional basis.

Determination of PBL versus free troposphere injection requires estimates of the PBL height, which entail additional uncertainties. We present an example using PBL heights derived from the MERRA-2 reanalysis (Figure 10); the combination of more elevated plumes and lower model-based PBL height mediates the results. This important question, which affects simulations of smoke-climate impacts as well as downwind air quality predictions warrants further study with PBL heights obtained from different sources. Efforts at using MISR stereo-derived plume heights to initialize model plume injection, and to begin assessing the impacts on downwind smoke dispersion, include Vernon *et al.* [2] and Zhu *et al.* [29]. Further work is also indicated in terms of expanding the database. Digitizing plumes is labor-intensive [17], and fully automating the process using AI techniques has thus far proved elusive [e.g., 30]. Yet, with more than 18 years of MISR global observations, the raw data exist to strengthen the statistics presented here, to better quantify interannual variability and to derive smoke-injection-height characteristics in regions where fire plumes are less abundant in the current dataset.

**Supplementary Materials:** The following are available online at <http://www.mdpi.com/2072-4292/xx/1/1/s1>, Figure S1: Examples of Plume Stereo-height Retrieval Density, Figure S2: Distributions of mean AOD<sub>558</sub> with respect to percentage of the DAR filled with successful retrievals (PcntHtsFilled) over 12 biomes for this study, Figure S3: Histogram of originally retrieved MISR plume heights, Figure S3: Histogram of originally retrieved MISR plume heights, originally retrieved and fitted depending on distribution type with and without  $\pm 500$  m factor, and originally retrieved and fitted to a normal distribution with 1xSD and 2xSD, Figure S4: Vertical distribution of number of stereo-height retrievals in 250-meter bins for successful retrievals and successful+filled retrievals (Pixel-weighted results), Figure S5: Vertical distribution of percentage of smoke in 250-meter bins for original AOD retrievals and final AOD retrievals (AOD-weighted results), Figure S6: Vertical distribution of percentage of smoke calculated with the original+AOD-filled retrievals and original+AOD-filled retrievals adjusted with the GFED4s fraction to account for small fires, over cropland fire in Europe and forest fires in North America, Figure S7: MISR maximum plume height summaries by region and biome, Figure S8: MISR mean AOD by region and biome, Figure S9: Zonal (80S–80N) averages of vertical distribution of biomass burning injection heights with the pixel-weighted method for northern summer and winter, and the difference between the AOD-weighted and pixel-weighted methods, Figure S10: Regional zonal averages of vertical distribution of biomass burning injection heights with the AOD-weighted method, Figure S11: Differences in the zonal (80S–80N) annual average vertical distribution of biomass burning injection heights with the AOD-weighted method for 2008–2009 and 2008–2010, Figure S12: Global diurnal planetary boundary layer height from MERRA-2, Table S1: Summary of equations used to calculate the fitting technique parameters, Table S2: Percentages (minimum and maximum) applied to the vertical distribution lowest level to account for small fires under detected by MISR, Table S3: Statistical summary of maximum plume heights and mean AOD per biome in the MISR climatology, Table S4: AOD-weighted percentages of fire smoke injection heights per fire region, main biomes and seasons, Tables S5: Pixel-weighted percentages of fire smoke injection heights per fire region, broad biomes and seasons.

**Author Contributions:** "Conceptualization, M.V.M. and R.A.K.; Methodology, M.V.M. and R.A.K.; Validation, M.V.M. and R.A.K.; Formal Analysis, M.V.M.; Investigation, M.V.M. and R.A.K.; Writing—Original Draft Preparation, R.A.K.; Writing—Review & Editing, R.A.K. and M.V.M.; Supervision, R.A.K."

**Funding:** The work of M. Val Martin is supported by the NASA Award Number NNX14AN47G and the Leverhulme Trust through a Leverhulme Research Centre Award (RC-2015-029). The work of R. Kahn is supported in part by NASA's Climate and Radiation Research and Analysis Program under H. Maring, NASA's Atmospheric Composition Program under R. Eckman, and the NASA Earth Observing System's MISR project.

**Acknowledgments:** Many students and some colleagues participated in digitizing plumes used in this study; in particular, we thank David Nelson, Mika Tosca, and Laura Gonzalez-Alonso. We also thank The University of Sheffield OnCampus Placement program for supporting the digitizing effort at University of Sheffield, Y. Chen (University of California, Irvine) for the GFEDv4s data, and D. Bau (University of Sheffield) for helpful discussions about the statistical fit analysis.

**Conflicts of Interest:** "The authors declare no conflict of interest."

1. Turquety, S.; Logan, J.A.; Jacob, D.J.; Hudman, R.C.; Leung, F.Y.; Heald, C.L.; Yantosca, R.M.; Wu, S.; Emmons, L.K.; Edwards, D.P.; Sachse, G.W. Inventory of boreal fire emissions for North America in 2004: Importance of peat burning and pyroconvective injection. *J. Geophys. Res.* **2007**, *112*, 1–13. doi:10.1029/2006JD007281.
2. Vernon, C.J.; Bolt, R.; Canty, T.; Kahn, R.A. The Impact of MISR-derived Injection Height Initialization on Wildfire and Volcanic Plume Dispersion in the HYSPLIT Model. *Atmospheric Measurement Techniques Discussions* **2018**, *2018*, 1–41. doi:10.5194/amt-2018-123.
3. Kahn, R.A.; Chen, Y.; Nelson, D.L.; Leung, F.Y.; Li, Q.; Diner, D.J.; Logan, J.A. Wildfire smoke injection heights: Two perspectives from space. *Geophysical Research Letters* **2008**, *35*.
4. Val Martin, M.; Logan, J.A.; Kahn, R.A.; Leung, F.Y.; Nelson, D.L.; Diner, D.J. Smoke injection heights from fires in North America: analysis of 5 years of satellite observations. *Atmos. Chem. Phys* **2010**, *10*, 1491–1510.
5. Tosca, M.; Randerson, J.; Zender, C.; Nelson, D.; Diner, D.; Logan, J. Dynamics of fire plumes and smoke clouds associated with peat and deforestation fires in Indonesia. *Journal of Geophysical Research: Atmospheres* **2011**, *116*.
6. Mims, S.R.; Kahn, R.A.; Moroney, C.M.; Gaitley, B.J.; Nelson, D.L.; Garay, M.J. MISR stereo heights of grassland fire smoke plumes in Australia. *IEEE Transactions on Geoscience and Remote Sensing* **2010**, *48*, 25–35.
7. Trentmann, J.; Luderer, G.; Winterrath, T.; Fromm, M.; Servranckx, R.; Textor, C.; Herzog, M.; Graf, H.F.; Andreae, M. Modeling of biomass smoke injection into the lower stratosphere by a large forest fire (Part I): reference simulation. *Atmospheric Chemistry and Physics* **2006**, *6*, 5247–5260.
8. Peterson, D.A.; Hyer, E.J.; Campbell, J.R.; Fromm, M.D.; Hair, J.W.; Butler, C.F.; Fenn, M.A. The 2013 Rim Fire: Implications for Predicting Extreme Fire Spread, Pyroconvection, and Smoke Emissions. *Bulletin of the American Meteorological Society* **2015**, *96*, 229–247, [<https://doi.org/10.1175/BAMS-D-14-00060.1>]. doi:10.1175/BAMS-D-14-00060.1.
9. Kahn, R.A.; Li, W.H.; Moroney, C.; Diner, D.J.; Martonchik, J.V.; Fishbein, E. Aerosol source plume physical characteristics from space-based multiangle imaging. *Journal of Geophysical Research: Atmospheres* **2007**, *112*.
10. Paugam, R.; Wooster, M.; Freitas, S.; Val Martin, M. A review of approaches to estimate wildfire plume injection height within large-scale atmospheric chemical transport models. *Atmospheric Chemistry and Physics* **2016**, *16*, 907–925. doi:10.5194/acp-16-907-2016.
11. Ichoku, C.; Kaufman, Y.J. A method to derive smoke emission rates from MODIS fire radiative energy measurements. *IEEE transactions on Geoscience and Remote Sensing* **2005**, *43*, 2636–2649.
12. Ichoku, C.; Ellison, L. Global top-down smoke-aerosol emissions estimation using satellite fire radiative power measurements. *Atmospheric Chemistry and Physics* **2014**, *14*, 6643–6667. doi:10.5194/acp-14-6643-2014.
13. Val Martin, M.; Kahn, R.A.; Logan, J.A.; Paugam, R.; Wooster, M.; Ichoku, C. Space-based observational constraints for 1-D fire smoke plume-rise models. *Journal of Geophysical Research: Atmospheres* **2012**, *117*.
14. Garratt, J. Review: the atmospheric boundary layer. *Earth-Science Reviews* **1994**, *37*, 89 – 134. doi:[https://doi.org/10.1016/0012-8252\(94\)90026-4](https://doi.org/10.1016/0012-8252(94)90026-4).
15. Freitas, S.R.; Longo, K.M.; Chatfield, R.; Latham, D.; Silva Dias, M.; Andreae, M.; Prins, E.; Santos, J.; Gielow, R.; Carvalho Jr, J. Including the sub-grid scale plume rise of vegetation fires in low resolution atmospheric transport models. *Atmospheric Chemistry and Physics* **2007**, *7*, 3385–3398.
16. Kukkonen, J.; Nikmo, J.; Sofiev, M.; Riikonen, K.; Petäjä, T.; Virkkula, A.; Levula, J.; Schobesberger, S.; Webber, D.M. Applicability of an integrated plume rise model for the dispersion from wild-land fires. *Geoscientific Model Development* **2014**, *7*, 2663–2681. doi:10.5194/gmd-7-2663-2014.
17. Nelson, D.L.; Garay, M.J.; Kahn, R.A.; Dunst, B.A. Stereoscopic height and wind retrievals for aerosol plumes with the MISR Interactive eXplorer (MINX). *Remote Sensing* **2013**, *5*, 4593–4628.
18. Giglio, L.; Van der Werf, G.; Randerson, J.; Collatz, G.; Kasibhatla, P. Global estimation of burned area using MODIS active fire observations. *Atmospheric Chemistry and Physics* **2006**, *6*, 957–974.
19. Diner, D.J.; Beckert, J.C.; Reilly, T.H.; Bruegge, C.J.; Conel, J.E.; Kahn, R.A.; Martonchik, J.V.; Ackerman, T.P.; Davies, R.; Gerstl, S.A.; others. Multi-angle Imaging SpectroRadiometer (MISR) instrument description and experiment overview. *IEEE Transactions on Geoscience and Remote Sensing* **1998**, *36*, 1072–1087.

20. Moroney, C.; Davies, R.; Muller, J.P. Operational retrieval of cloud-top heights using MISR data. *IEEE Transactions on Geoscience and Remote Sensing* **2002**, *40*, 1532–1540.
21. Muller, J.P.; Mandanayake, A.; Moroney, C.; Davies, R.; Diner, D.J.; Paradise, S. MISR stereoscopic image matchers: Techniques and results. *IEEE Transactions on Geoscience and Remote Sensing* **2002**, *40*, 1547–1559.
22. Bartholomé, E.; Belward, A.S. GLC2000: a new approach to global land cover mapping from Earth observation data. *International Journal of Remote Sensing* **2005**, *26*, 1959–1977, [\[https://doi.org/10.1080/01431160412331291297\]](https://doi.org/10.1080/01431160412331291297). doi:10.1080/01431160412331291297.
23. Kahn, R.A.; Gaitley, B.J.; Garay, M.J.; Diner, D.J.; Eck, T.F.; Smirnov, A.; Holben, B.N. Multiangle Imaging SpectroRadiometer global aerosol product assessment by comparison with the Aerosol Robotic Network. *Journal of Geophysical Research: Atmospheres* **2010**, *115*.
24. Hahn, G.J.; Shapiro, S.S. *Statistical Models in Engineering*; John Wiley & Sons, Inc., New York, 1994.
25. Randerson, J.T.; Chen, Y.; Werf, G.R.; Rogers, B.M.; Morton, D.C. Global burned area and biomass burning emissions from small fires. *Journal of Geophysical Research: Biogeosciences*, *117*, [\[https://agupubs.onlinelibrary.wiley.com/doi/pdf/10.1029/2012JG002128\]](https://agupubs.onlinelibrary.wiley.com/doi/pdf/10.1029/2012JG002128). doi:10.1029/2012JG002128.
26. Williamson, G.J.; Prior, L.D.; Jolly, W.M.; Cochrane, M.A.; Murphy, B.P.; Bowman, D.M.J.S. Measurement of inter- and intra-annual variability of landscape fire activity at a continental scale: the Australian case. *Environmental Research Letters* **2016**, *11*, 035003.
27. CalFire. Cal Fire web site. [http://www.fire.ca.gov/fire\\_protection/fire\\_protection\\_fire\\_info\\_redbooks](http://www.fire.ca.gov/fire_protection/fire_protection_fire_info_redbooks), accessed 24 August, 2018., 2018.
28. Bosilovich, M.G.; Lucchesi, R.; Suarez, M. MERRA-2: File Specification. GMAO Office Note No. 9 (Version 1.1) 73 pp, available from [http://gmao.gsfc.nasa.gov/pubs/office\\_notes](http://gmao.gsfc.nasa.gov/pubs/office_notes), accessed 24 August, 2018., 2016.
29. Zhu, L.; Val Martin, M.; Hecobian, A.; Gatti, L.V.; Kahn, R.; Fischer, E.V. Development and implementation of a new biomass burning emissions injection height scheme for the GEOSChem model. *Geoscientific Model Development Discussions* **2018**, *2018*, 1–30. doi:10.5194/gmd-2018-93.
30. Mazzoni, D.; Logan, J.A.; Diner, D.; Kahn, R.; Tong, L.; Li, Q. A data-mining approach to associating MISR smoke plume heights with MODIS fire measurements. *Remote Sens. Environ.* **2007**, *107*, 138–148.

© 2018 by the authors. Submitted to *Remote Sens.* for possible open access publication under the terms and conditions of the Creative Commons Attribution (CC BY) license (<http://creativecommons.org/licenses/by/4.0/>).
